# Supplementary material for: Zirconium-mediated carbon–fluorine bond functionalisation through cyclohexyne “umpolung”
Source: Royal Society of Chemistry journal article supplement (doi:10.1039/d4sc08522a), 2025-01-01
Supplement: d4sc08522a1.pdf [file d4sc08522a1.pdf]

## Zirconium-Mediated Carbon-Fluorine Bond Functionalization Through Cyclohexyne “Umpolung”

Sara Bonfante,<sup>a,b</sup> Theo F. N. Tanner,<sup>b</sup> Christian Lorber,<sup>a\*</sup> Jason M. Lynam,<sup>b\*</sup> Antoine  
Simonneau<sup>a\*</sup> and John M. Slattery<sup>b\*</sup>

<sup>a</sup> LCC-CNRS, Université de Toulouse, CNRS, UPS, 205 route de Narbonne, BP 44099, F-31077 Toulouse cedex  
4, France.

<sup>b</sup> Department of Chemistry, University of York, Heslington, York YO10 5DD, UK.

### Supporting Information

## Contents

|          |                                                                                                              |           |
|----------|--------------------------------------------------------------------------------------------------------------|-----------|
| <b>1</b> | <b>Experimental Details.....</b>                                                                             | <b>3</b>  |
| 1.1      | General methods .....                                                                                        | 3         |
| 1.2      | Procedure for the synthesis of the 1-bromocyclohexene .....                                                  | 4         |
| 1.3      | Procedure for the synthesis of the methylzirconocene chloride.....                                           | 5         |
| 1.4      | Procedure for the synthesis of complex 1.....                                                                | 6         |
| 1.5      | Procedure for the stability test of complex 1.....                                                           | 7         |
| 1.6      | Procedure for the synthesis of complex 3.....                                                                | 8         |
| 1.7      | Procedure for the synthesis of 2,4-difluoro-6-(2-iodocyclohexen-1-yl)-pyridine .....                         | 11        |
| 1.8      | Procedure for the solvent optimisation in the synthesis of complex 3 .....                                   | 14        |
| 1.9      | Procedure for the synthesis of complex 2.....                                                                | 15        |
| 1.10     | Procedure for the synthesis of complex 5 and its iodinolysis .....                                           | 18        |
| 1.11     | Study of the reactivity of the zirconocene-cyclohexyne transient intermediate with Py-F <sub>5</sub> .....   | 23        |
| 1.12     | Procedure for the synthesis of 6 .....                                                                       | 24        |
| 1.13     | Procedure for the ligand liberation of complex 6 via HCl addition.....                                       | 26        |
| 1.14     | Procedure for the ligand liberation of complex 6 via I <sub>2</sub> addition.....                            | 27        |
| 1.15     | Study on the solvent optimisation for the synthesis of complex 6 .....                                       | 28        |
| 1.16     | Study on the temperature optimisation for the synthesis of complex 6 .....                                   | 29        |
| 1.17     | Study on the concentration optimisation for the synthesis of complex 6 .....                                 | 30        |
| 1.18     | Study on the reagent ratio optimisation for the synthesis of complex 6 .....                                 | 30        |
| 1.19     | Procedure for the reactivity test of 1 with difluorophosphoranes 8 and F <sub>2</sub> PMe <sub>3</sub> ..... | 31        |
| <b>2</b> | <b>X-ray crystal structure.....</b>                                                                          | <b>33</b> |
| 2.1      | Molecular structure of 3 .....                                                                               | 33        |
| 2.2      | Structural data comparison .....                                                                             | 34        |
| <b>3</b> | <b>DFT calculations .....</b>                                                                                | <b>36</b> |
| 3.1      | General Methods .....                                                                                        | 36        |
| 3.2      | Collated Energies and xyz coordinates .....                                                                  | 37        |
| <b>4</b> | <b>References .....</b>                                                                                      | <b>95</b> |

## 1 Experimental Details

### 1.1 General methods

Unless otherwise indicated, all reactions were performed in flame- or oven-dried glassware with rigorous exclusion of air and moisture, using a nitrogen or argon-filled glove box ( $O_2 < 1$  ppm,  $H_2O < 1$  ppm) or regular Schlenk techniques.<sup>1</sup> Liquids were transferred using either plastic syringes, Teflon canulae with or without filtering tip, or Hamilton™ microsyringes. Anhydrous  $Et_2O$ ,  $CH_2Cl_2$ , pentane and toluene were pre-dried by passing through a Puresolv MD 7 solvent purification machine. THF, deuterated-THF, deuterated toluene and  $C_6D_6$  were dried over metallic sodium, purified by trap-to-trap transfer and degassed by three cycles of freeze-pump-thaw.  $CD_2Cl_2$  and  $CD_3CN$  were dried over calcium hydride for three days, purified by trap-to-trap transfer and degassed by freeze-pump-thaw. Cyclohexane and deuterated cyclohexane were dried over molecular sieves prior to use. Reagents were purchased from commercial suppliers and purity was confirmed by NMR spectroscopy. The fluorinated aromatics were purchased from Sigma Aldrich, Fluorochem and Apollo Scientific and dried over molecular sieves prior to use.

All NMR spectra were obtained using J. S. Young's NMR tubes sealed under argon or nitrogen.  $^1H$ ,  $^{13}C\{^1H\}$ ,  $^{29}Si$ ,  $^{19}F$  and  $^{31}P\{^1H\}$  NMR spectra were recorded on Bruker Avance II 400 MHz. Chemical shifts are in parts per million (ppm) downfield from tetramethylsilane and are referenced to the residual solvent resonances as the internal standard ( $C_6HD_5$ :  $\delta$  reported = 7.16 ppm;  $CHDCl_2$ :  $\delta$  reported = 5.32 ppm;  $C_6HD_{11}$  = 1.38 ppm;  $C_4HD_7O$  = 3.58 ppm;  $C_7HD_{12}$  = 2.09 ppm for  $^1H$  NMR).  $^{13}C\{^1H\}$  NMR spectra were calibrated according to the IUPAC recommendation using a unified chemical shift scale based on the proton resonance of tetramethylsilane as primary reference.<sup>2,3</sup>  $^{19}F$  NMR chemical shift  $\delta$  are reported in ppm, relative to the resonance shift of an external solvent  $CFCl_3$ , at  $\delta$  0.0 ppm.  $^{31}P\{^1H\}$  and  $^{31}P$  NMR chemical shifts reported in ppm, relative to the resonance shift of an external solvent  $H_3PO_4$  at  $\delta$  0.0 ppm. Data are reported as follows: chemical shift, multiplicity (br = broad, s = singlet, d = doublet, t = triplet, q = quartet, p = quintet, sext = sextet, hept = heptet, m = multiplet, mc = multiplet center, tm = triplet of multiplets, dm = doublet of multiplets), coupling constant (Hz) and integration.  $^1H$  and  $^{13}C\{^1H\}$  resonance signals were attributed by means of 2D  $^1H$  COSY,  $^1H$ - $^{13}C$  HSQC,  $^1H$ - $^{13}C$  HMBC,  $^1H$ - $^{31}P$  HMBC and  $^1H$ - $^{19}F$  HMBC experiments. The yields of compounds **1** and **3** are isolated yields. The NMR yields of compounds **2**, **5**, **6** were calculated from the ratio of the integrals of the signals of complex **1** and the deuterated solvent ( $C_6D_6$  or  $C_6D_{12}$ ) before the reaction (blank sample) and the ratio of the signals of the products and solvent at the end of the reaction.

Elemental analyses were performed in the facility available in Laboratoire de Chimie de Coordination (CNRS) using PerkinElmer 2400 Series Analyser. GC/MS analyses were performed with a Shimadzu QP2010 Ultra equipped with a ZB-5MS GC column (electronic impact ionizer and orbitrap analyzer). Mass spectral data are

quoted as the  $m/z$  ratio along with the relative peak height in brackets (base peak = 100). Mass to charge ratios ( $m/z$ ) are reported in Daltons.

Single-crystals diffraction data were collected using a SuperNova diffractometer at 100 K using Cu  $K\alpha$  radiation ( $\lambda = 1.54184 \text{ \AA}$ ) filtered through a graphite monochromator.

## 1.2 Procedure for the synthesis of the 1-bromocyclohexene

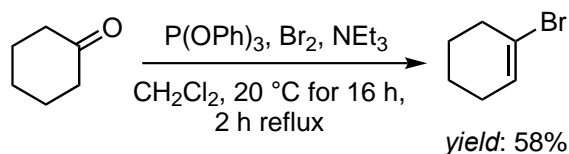

1-Bromocyclohexene was prepared according to a reported procedure.<sup>4</sup> To a cold solution of triphenyl phosphite (9.25 mL, 35.0 mmol, 1.1 equiv.) in anhydrous  $CH_2Cl_2$  (100 mL) maintained at  $-60 \text{ }^\circ C$  under Ar flow, bromine (2.00 mL, 38.5 mmol, 1.2 equiv.) was added dropwise. Anhydrous triethylamine (6.00 mL, 42.0 mmol, 1.3 equiv.) and cyclohexanone (3.14 g, 32.0 mmol, 1.0 equiv.) were added to the resulting pale orange solution. The reaction mixture was stirred for 16 hours, while warming to room temperature, and then heated to reflux for a further 2 hours. Purification by chromatography column (pentane) of the crude ( $R_f = 0.7$ , pentane) followed by trap-to-trap transfer yielded a colourless liquid (2.98 g, 18.5 mmol, 58% yield).

**$^1H$  NMR (600 MHz,  $CDCl_3$ ):**  $\delta$  6.03 (tt,  $^3J_{HH} = 4.0 \text{ Hz}$ ,  $^4J_{HH} = 1.7 \text{ Hz}$ , 1H), 2.44 – 2.39 (m, 2H), 2.10 – 2.04 (m, 2H), 1.77 – 1.70 (m, 2H), 1.64 – 1.57 (m, 2H). The NMR analysis is in agreement with that reported in the literature.<sup>4</sup>

### 1.3 Procedure for the synthesis of the methylzirconocene chloride

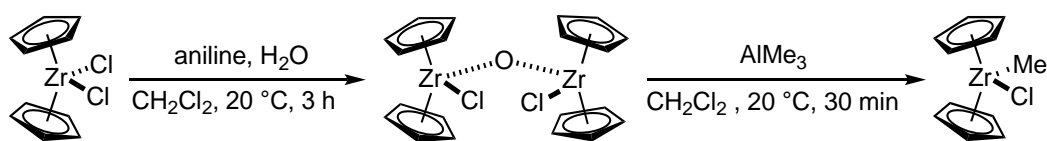

Methylzirconocene chloride was synthesised following a reported procedure.<sup>5</sup>

#### *First step: synthesis of $[(\text{Cp}_2\text{ZrCl})_2(\mu\text{-O})]$*

A 250 mL Schlenk flask was charged with  $\text{Cp}_2\text{ZrCl}_2$  (10.00 g, 34.2 mmol, 1.0 equiv.),  $\text{CH}_2\text{Cl}_2$  (80 mL) followed by aniline (3.4 mL, 37.2 mmol, 1.1 equiv.). After stirring for 5 minutes, distilled water (0.43 mL, 23.8 mmol, 0.7 equiv.) was added and a white solid of aniline hydrochloride salt was observed instantly. Stirring was continued for about 3 hours at  $20\text{ }^\circ\text{C}$ . The flask was placed in the fridge ( $+4\text{ }^\circ\text{C}$ ) for 15 hours. Cold filtration under argon of the resulting mixture afforded a clear yellowish filtrate. The remaining solid was washed once with cold ( $0\text{ }^\circ\text{C}$ )  $\text{CH}_2\text{Cl}_2$  (10 mL) and the combined  $\text{CH}_2\text{Cl}_2$  layers were concentrated to a yellowish solid. Dry pentane (11 mL) was added and the suspension was stirred for 20 minutes. The supernatant was filtered-off and the remaining white solid was washed once with dry pentane (11 mL) and dried under high vacuum for 1 hour to afford the zirconium bridged oxide  $[(\text{Cp}_2\text{ZrCl})_2(\mu\text{-O})]$  (7.04 g, 13.3 mmol, 78% yield) as a pale pink solid.

**$^1\text{H}$  NMR (400 MHz,  $\text{C}_6\text{D}_6$ ):**  $\delta$  6.02 (s, Cp).

#### *Second step: synthesis of the methylzirconocene chloride*

To a 100 mL Schlenk flask containing a suspension of  $[(\text{Cp}_2\text{ZrCl})_2(\mu\text{-O})]$  (7.04 g, 13.3 mmol, 1.0 equiv.) in dry  $\text{CH}_2\text{Cl}_2$  (65 mL) was added a trimethylaluminium solution (2M in hexane, 16.7 mL, 33.3 mmol, 2.5 equiv.) at  $20\text{ }^\circ\text{C}$ . After a few seconds the mixture became a homogenous yellowish solution, no exotherm was observed. After 30 minutes, dry  $\text{Et}_2\text{O}$  (26 mL) was added, and stirring was stopped after 2 minutes. The solvent was slowly evaporated until the first yellow solids started to precipitate (about 3–5 mL left in the flask). Stirring on, dry pentane (26 mL) was added. After 10 minutes stirring, the white solid obtained was filtered under argon and washed twice with dry pentane (17 mL each) and finally dried under vacuum for 3 hours to afford the methylzirconocene chloride (4.47 g, 16.5 mmol, 62%) as a white solid.

**$^1\text{H}$  NMR (400 MHz,  $\text{C}_6\text{D}_6$ ):**  $\delta$  5.74 (s, 10H, Cp), 0.45 (s, 3H,  $\text{CH}_3$ ). The NMR analysis is in agreement with that reported in the literature.<sup>5</sup>

#### 1.4 Procedure for the synthesis of complex 1

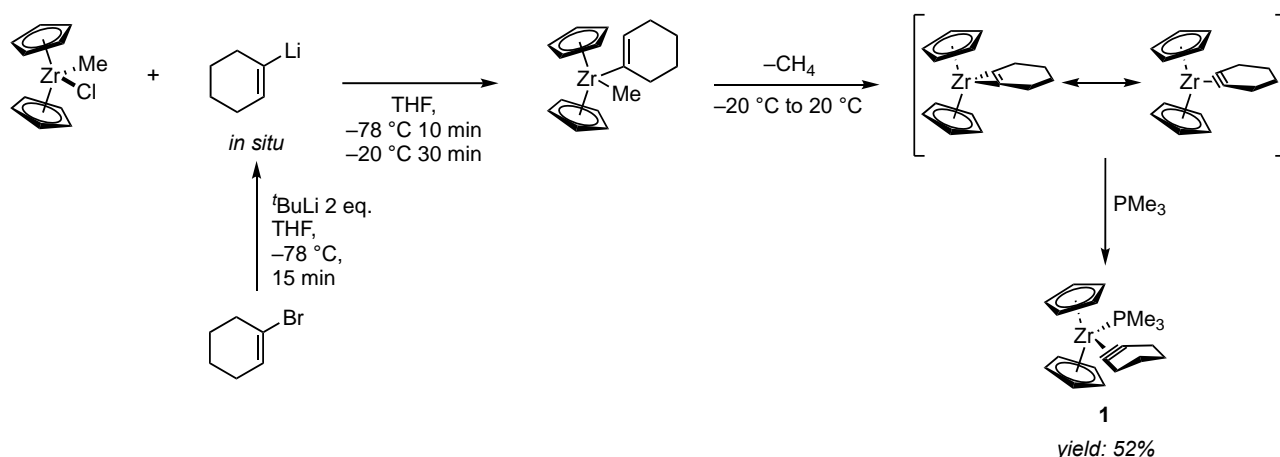

Complex **1** was prepared according to a reported procedure.<sup>6</sup> To a Schlenk flask under argon was added dry THF (21 mL), which was cooled to  $-78\text{ }^\circ\text{C}$ .  $t\text{BuLi}$  in pentane 1.72 M (5.8 mL, 10.7 mmol, 2.1 equiv.) was added with stirring. 1-Bromocyclohexene (0.86 g, 5.4 mmol, 1.1 equiv.) was added to the solution dropwise, *via* syringe and the yellow reaction mixture was allowed to stir at  $-78\text{ }^\circ\text{C}$  for 15 minutes. The 1-lithiocyclohexene, so formed, was added dropwise *via* cannula to a  $-78\text{ }^\circ\text{C}$  solution of methylzirconocene chloride (1.44 g, 5.1 mmol, 1.0 equiv.) in THF (28 mL). The reaction mixture was stirred for 10 minutes at  $-78\text{ }^\circ\text{C}$  and was then warmed to  $-20\text{ }^\circ\text{C}$  and stirred for an additional 10 min. At this point, trimethylsilyl chloride (0.05 mL, 0.3 mmol, 0.1 equiv.) was added *via* syringe (to destroy excess alkenyllithium) and the brown reaction mixture was stirred at  $-20\text{ }^\circ\text{C}$  for additional 10 minutes. Trimethylphosphine (0.81 mL, 8.0 mmol, 1.6 equiv.) was added *via* syringe and the deep red reaction mixture was allowed to stir at  $20\text{ }^\circ\text{C}$  for 16 hours. The resulting mixture was concentrated *in vacuo* and the solid residue was extracted with toluene (7 mL) and filtered under argon. The remaining lithium salts were washed with five portions of toluene (10 mL each) and the toluene solution was concentrated to dryness to afford **6** (1.00 g, 2.7 mmol, 52%) as a dark red solid.

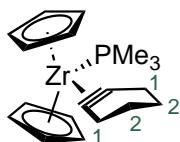

**$^1\text{H}$  NMR (400 MHz,  $\text{C}_6\text{D}_6$ ):**  $\delta$  5.25 (d,  $J_{\text{HP}} = 5.8\text{ Hz}$ , 10H, Cp), 2.85 (t,  $^3J_{\text{HH}} = 5.9\text{ Hz}$ , 2H, 1-*H*), 2.28 (tt  $^3J_{\text{HH}} = 5.8\text{ Hz}$ ,  $^4J_{\text{HH}} = 1.7\text{ Hz}$ , 2H, 1-*H*), 1.77 – 1.62 (m, 4H, 2-*H*), 0.96 (d,  $^2J_{\text{HP}} = 5.8\text{ Hz}$ , 9H,  $\text{PCH}_3$ ).

**$^{31}\text{P}$  NMR (243 MHz,  $\text{C}_6\text{D}_6$ ):**  $\delta$  -2.22 (bs).

The NMR analysis is in agreement with that reported in the literature.<sup>6</sup>

### 1.5 Procedure for the stability test of complex **1**

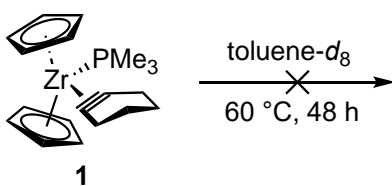

The following manipulation was carried out in an Ar-filled glovebox. Complex **1** (15.0 mg, 0.04 mmol) was dissolved in toluene- $d_8$  (0.7 mL) in an NMR tube equipped with a J. S. Young's valve. The mixture was heated up to 60 °C for 48 hours and analysed by  $^1\text{H}$  and  $^{31}\text{P}$  NMR spectroscopy, which showed that no decomposition occurred.

## 1.6 Procedure for the synthesis of complex 3

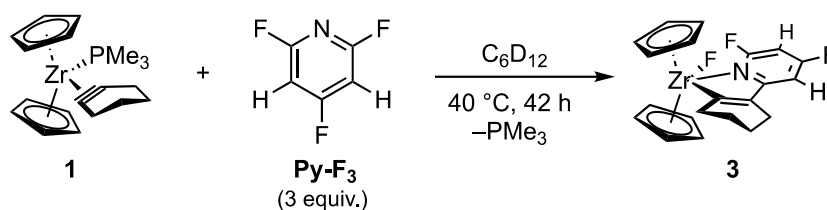

The following manipulation was carried out in an Ar-filled glovebox. Complex **1** (62.0 mg, 0.16 mmol, 1.0 equiv.) was dissolved in cyclohexane-*d*<sub>12</sub> (0.7 mL) in an NMR tube equipped with a J. S. Young's valve. 2,4,6-trifluoropyridine (39.9  $\mu\text{L}$ , 0.48 mmol, 3.0 equiv.) was added and the mixture was kept at 40 °C for 42 hours. The product was dried under reduced pressure to afford **3** as a dark red solid (49.4 mg, isolated yield 71%). 50 mg of the solid were dissolved in toluene and set for crystallisation by vapor diffusion with tetramethylsilane as antisolvent. The obtained crystals were suitable for X-ray diffraction analysis and are reported in section 3.1.

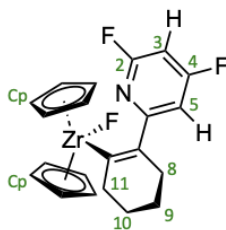

**<sup>1</sup>H NMR (400 MHz, C<sub>6</sub>D<sub>6</sub>):** 6.35 (dd, 1H, <sup>3</sup>J<sub>HF</sub> = 9.7 Hz, <sup>4</sup>J<sub>HH</sub> = 2.3 Hz, 3-*H*), 5.96 (s, 10H, Cp), 5.58 (mc, 1H, 5-*H*), 2.96 (mc, 2H, 11-*H*), 1.94 (mc, 2H, 8-*H*), 1.66 (mc, 4H, 9-*H*, 10-*H*).

**<sup>19</sup>F NMR (377 MHz, C<sub>6</sub>D<sub>6</sub>):** 35.3 (s, 1F, F-Zr), -60.7 (mc, 1F, 6-F), -94.7 (mc, 1F, 4-F).

**<sup>13</sup>C{<sup>1</sup>H} NMR (101 MHz, C<sub>6</sub>D<sub>6</sub>):** 215 (d, <sup>2</sup>J<sub>CF</sub> = 3.7 Hz, 12-C), 185 (s, 7-C), 172.23 (dd, <sup>1</sup>J<sub>CF</sub> = 264.1 Hz, <sup>3</sup>J<sub>CF</sub> = 15.1 Hz, 6-C), 163 (dd, <sup>1</sup>J<sub>CF</sub> = 246.2 Hz, <sup>3</sup>J<sub>CF</sub> = 15.1 Hz, 4-C), 138 (d, <sup>3</sup>J<sub>CF</sub> = 3.1 Hz, 2-C), 111 (s, Cp), 102 (dd, <sup>2</sup>J<sub>CF</sub> = 19.4 Hz, <sup>4</sup>J<sub>CF</sub> = 3.4 Hz, 3-C), 92.4 (dd, <sup>2</sup>J<sub>CF</sub> = 38.6 Hz, <sup>2</sup>J<sub>CF</sub> = 24.4 Hz, 5-C), 38.3 (d, <sup>3</sup>J<sub>CF</sub> = 14.3 Hz, 11-C), 27.6 (s, 10-C), 24.4 (d, <sup>4</sup>J<sub>CF</sub> = 3.6 Hz, 8-C), 23.5 (s, 9-C).



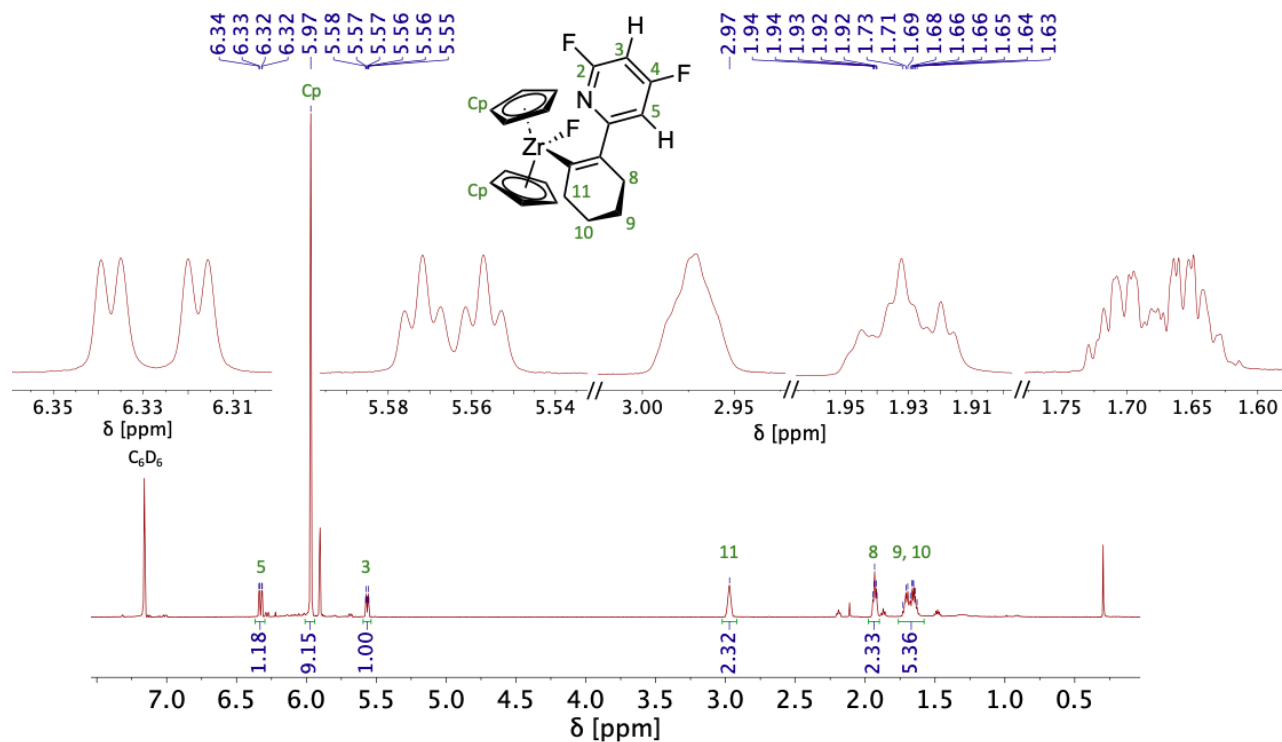

Figure S1  $^1\text{H}$  NMR (500 MHz,  $\text{C}_6\text{D}_6$ ) spectrum of the crude reaction mixture of the reaction between the zirconocene- $\text{PMe}_3$  adduct **1** (1 equiv.) with **Py-F<sub>3</sub>** (3 equiv.) in cyclohexane at 40 °C for 42 hours, dried and dissolved in  $\text{C}_6\text{D}_6$ . Magnifications of the signals of complex **3** are given.

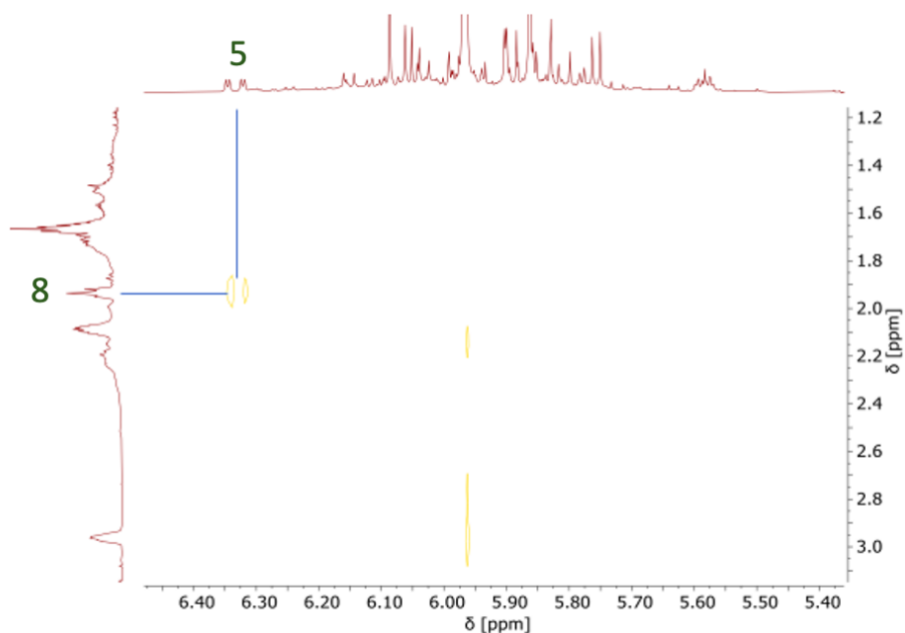

Figure S2  $^1\text{H}$  NOESY (500 MHz,  $\text{C}_6\text{D}_6$ ) spectrum of the crude reaction mixture of the reaction between the zirconocene- $\text{PMe}_3$  adduct **1** (1 equiv.) with **Py-F<sub>3</sub>** (3 equiv.) in cyclohexane at 40 °C for 42 hours, dried and dissolved in  $\text{C}_6\text{D}_6$ . The spatial correlation between protons in position 5 and 8 is highlighted.

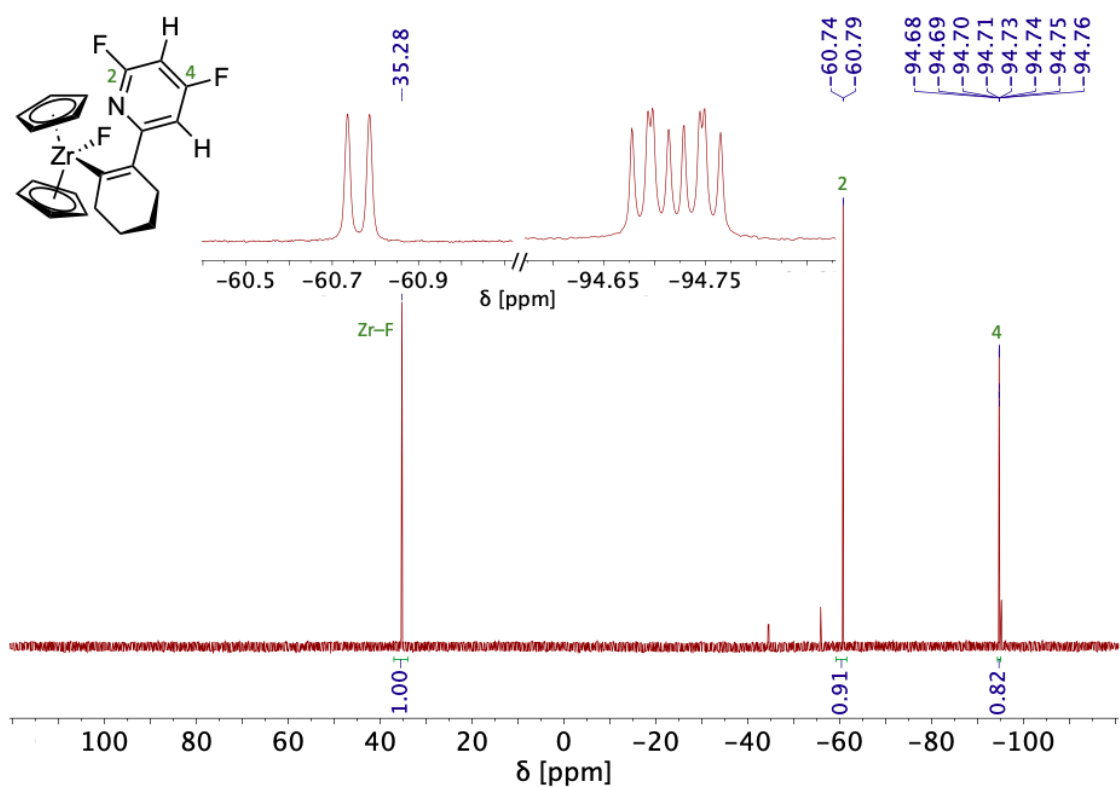

Figure S3  $^{19}\text{F}$  NMR (377 MHz,  $\text{C}_6\text{D}_6$ ) spectrum of the crude reaction mixture of the reaction between the zirconocene- $\text{PMe}_3$  adduct **1** (1 equiv.) with **Py-F<sub>3</sub>** (3 equiv.) in cyclohexane at 40 °C for 42 hours, dried and dissolved in  $\text{C}_6\text{D}_6$ . Magnifications of the signals of complex **3** are given.

## 1.7 Procedure for the synthesis of 2,4-difluoro-6-(2-iodocyclohexen-1-yl)-pyridine

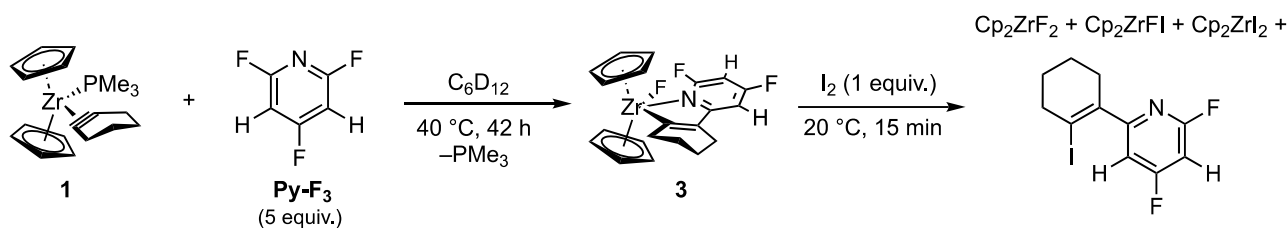

The following manipulation was carried out in an Ar-filled glovebox. Complex **1** (62.0 mg, 0.16 mmol, 1.0 equiv.) was dissolved in cyclohexane- $d_{12}$  (0.7 mL) in an NMR tube equipped with a J. S. Young's valve. 2,4,6-trifluoropyridine (68.2  $\mu\text{L}$ , 0.82 mmol, 5.0 equiv.) was added and the mixture was kept at 40 °C for 42 hours. The dark solid was filtered, the filtrate was dried under reduced pressure and dissolved in 0.6 mL of  $\text{C}_6\text{D}_6$ .  $\text{I}_2$  (40.0 mg, 0.16 mmol, 1.0 equiv.) was added to get a mixture of 2,4-difluoro-6-(2-iodocyclohexen-1-yl)-pyridine,  $\text{Cp}_2\text{ZrF}_2$ ,  $\text{Cp}_2\text{ZrFI}$ ,  $\text{Cp}_2\text{ZrI}_2$  after 30 min reaction time at 20 °C.

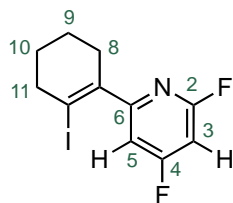

### 2,4-difluoro-6-(2-iodocyclohexen-1-yl)-pyridine:

$^1\text{H}$  NMR (400 MHz,  $\text{C}_6\text{D}_6$ ): 6.63 (ddd,  $^3J_{\text{HF}} = 8.5$  Hz,  $J_{\text{HH}} = 1.9$  Hz,  $^5J_{\text{HF}} = 0.7$  Hz, 1H, 5-*H*), 5.90 – 5.83 (m, 1H, 3-*H*), 2.50 – 2.41 (m, 2H, 11-*H*), 2.31 – 2.20 (m, 2H, 8-*H*), 1.40 – 1.30 (m, 1H, 10-*H*), 1.24 – 1.18 (m, 2H, 9-*H*).

$^{19}\text{F}$  NMR (377 MHz,  $\text{C}_6\text{D}_6$ ): –63.3 (d,  $^3J_{\text{HF}} = 22.6$  Hz, 1F, 2-*F*), –97.9 (mc, 1F, 4-*F*).

$^{13}\text{C}\{^1\text{H}\}$  NMR (101 MHz,  $\text{C}_6\text{D}_6$ ): 174.2 (d,  $^1J_{\text{CF}} = 290.1$  Hz, 2-*C*), 165.1 (d,  $^1J_{\text{CF}} = 192.2$  Hz, 4-*C*), 142.4 (d,  $^3J_{\text{CF}} = 3.4$  Hz, 6-*C*), 110.1 (dd,  $J_{\text{CF}} = 18.9$  Hz,  $J_{\text{CF}} = 5.5$  Hz, 5-*C*), 100.3 (s, 7-*C*), 96.1 (dd,  $J_{\text{CF}} = 42.5$  Hz,  $J_{\text{CF}} = 22.3$  Hz, 3-*C*), 41.6 (s, 8-*C*), 31.6 (s, 11-*C*), 25.0 (s, 10-*C*), 21.9 (s, 9-*C*).

GC(EI)-MS:  $[\text{C}_{11}\text{H}_{10}\text{F}_2\text{N}]^{*+}$  321,  $[\text{C}_{11}\text{H}_{10}\text{F}_2\text{N}]^{*+}$  194 *m/z*.

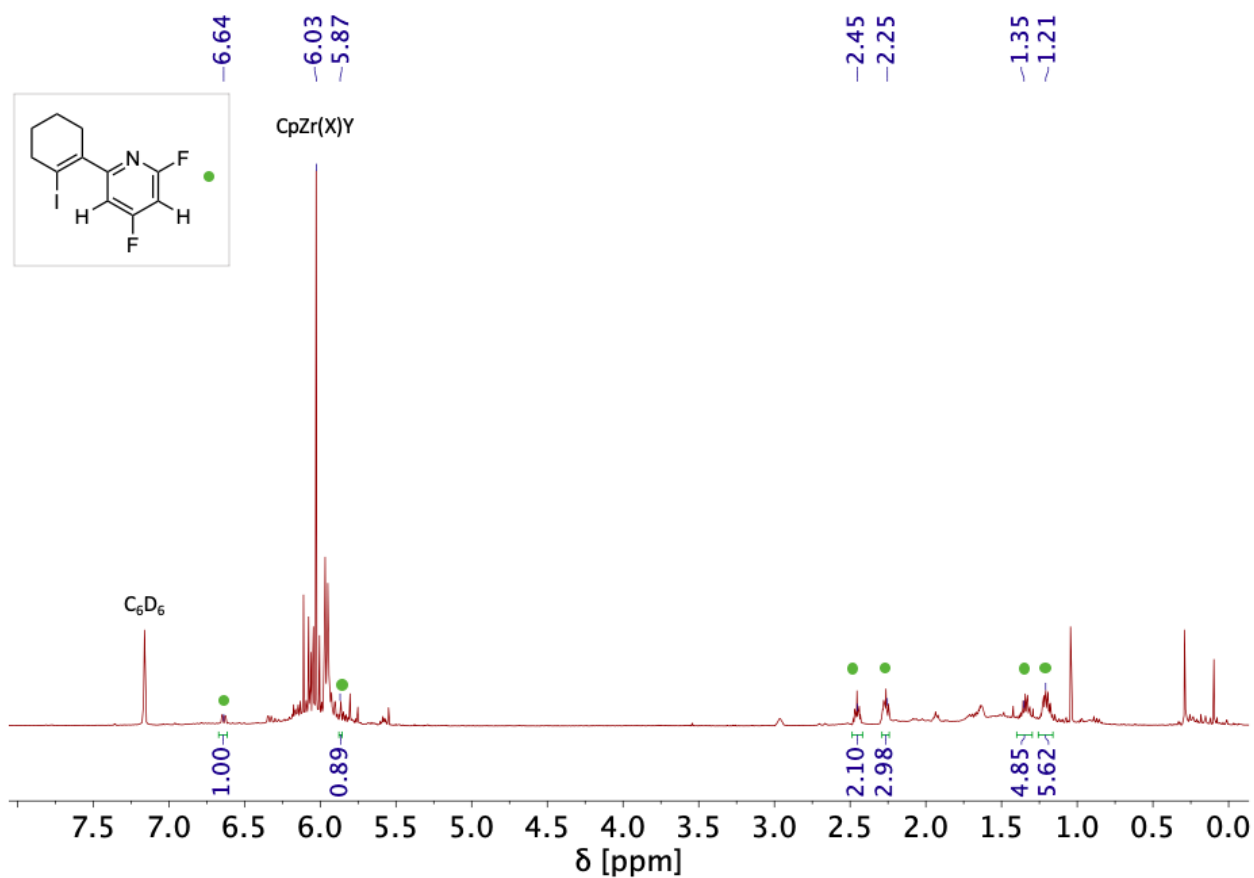

Figure S4 <sup>1</sup>H NMR (400 MHz, C<sub>6</sub>D<sub>6</sub>) spectrum of the iodolysed (I<sub>2</sub>, 1 equiv.) crude reaction mixture of the reaction between the zirconocene-PMe<sub>3</sub> adduct **1** (1 equiv.) with Py-F<sub>3</sub> (3 equiv.) in cyclohexane at 40 °C for 42 hours.

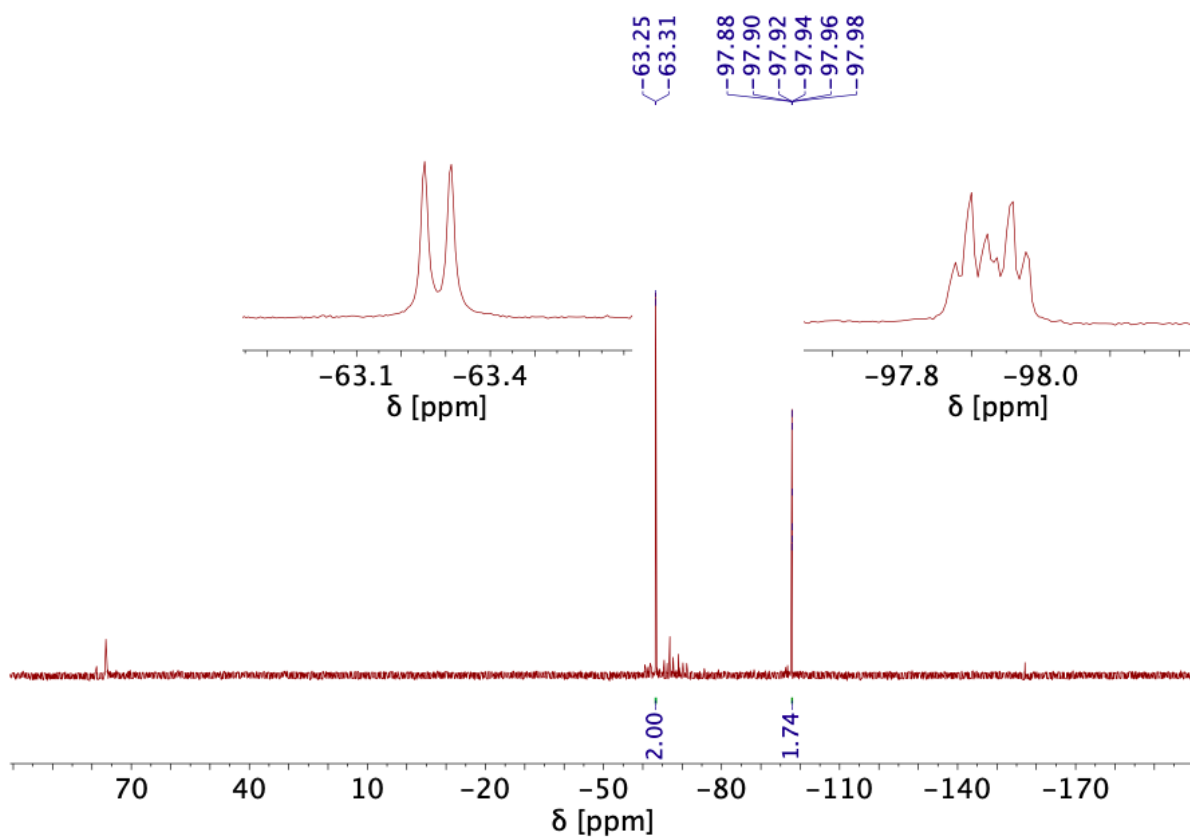

Figure S5  $^{19}\text{F}$  NMR (377z MHz,  $\text{C}_6\text{D}_6$ ) spectrum of the iodinated ( $\text{I}_2$ , 1 equiv.) crude reaction mixture of the reaction between the zirconocene- $\text{PMe}_3$  adduct **1** (1 equiv.) with  $\text{Py-F}_3$  (3 equiv.) in cyclohexane at 40 °C for 42 hours. Magnifications of the signals of complex **3** are given.

### 1.8 Procedure for the solvent optimisation in the synthesis of complex 3

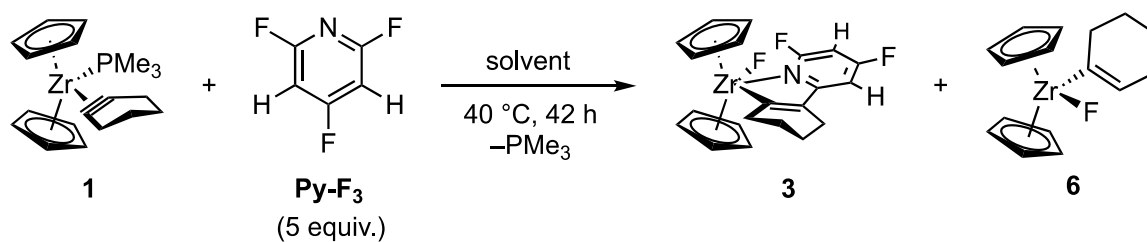

The following manipulation was carried out in an Ar-filled glovebox. Complex **1** (62.0 mg, 0.16 mmol, 1.0 equiv.) was dissolved in 0.7 mL of the tested solvent (i.e., C<sub>6</sub>D<sub>6</sub>, toluene-*d*<sub>8</sub>, cyclohexane, chlorobenzene, Et<sub>2</sub>O, THF-*d*<sub>8</sub>) in an NMR tube equipped with a J. S. Young's valve. 2,4,6-trifluoropyridine (67.7 μL, 0.82 mmol, 5.0 equiv.) was added. The mixture was kept at 40 °C and monitored over time by <sup>1</sup>H, <sup>31</sup>P and <sup>19</sup>F NMR spectroscopy.

| Solvent                              | <b>6 : 3</b> ratio <sup>a</sup> |
|--------------------------------------|---------------------------------|
| Tetrahydrofuran                      | 65 : 35                         |
| Chlorobenzene- <i>d</i> <sub>5</sub> | 45 : 55                         |
| Toluene- <i>d</i> <sub>8</sub>       | 39 : 61                         |
| Benzene- <i>d</i> <sub>6</sub>       | 39 : 61                         |
| Diethyl ether                        | 24 : 76                         |
| Cyclohexane                          | 3 : 97                          |

Table S1 Conditions: 0.04 mmol of complex **3** (1 equiv.), 0.04 mmol of **Py-F<sub>3</sub>** (1 equiv.), 0.7 mL of solvent, 40 °C, 48 hours.

<sup>a</sup> Determined by <sup>19</sup>F NMR spectroscopy.

## 1.9 Procedure for the synthesis of complex 2

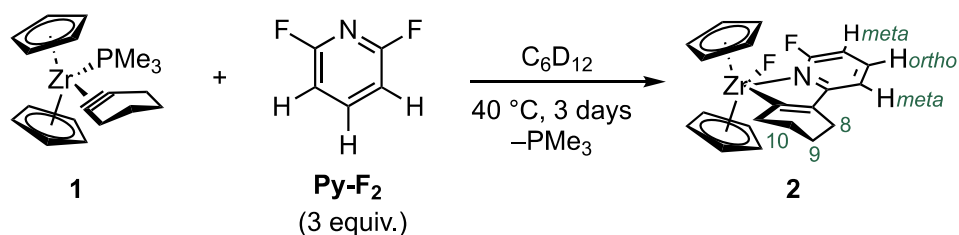

The following manipulation was carried out in an Ar-filled glovebox. Complex **1** (15.0 mg, 0.04 mmol, 1.0 equiv.) was dissolved in cyclohexane-*d*<sub>12</sub> (0.7 mL) in an NMR tube equipped with a J. S. Young's valve. 2,6-difluoropyridine (10.8  $\mu\text{L}$ , 0.12 mmol, 3.0 equiv.) was added and product **2** was obtained in 72% NMR yield after 3 days at 40  $^\circ\text{C}$ . The reaction evolution was monitored by  $^1\text{H}$ ,  $^{31}\text{P}$  and  $^{19}\text{F}$  NMR spectroscopy.

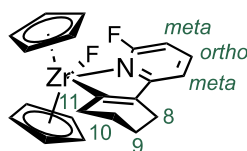

**$^1\text{H}$  NMR (500 MHz,  $\text{C}_6\text{D}_{12}$ ):** 7.74 (*pseudo* q,  $J = 7.8$  Hz, 1H, *para-H*), 7.02 (*pseudo* dt,  $^3J_{\text{HH}} = 7.8$  Hz,  $J = 1.2$  Hz, 1H, *meta-H*), 6.57 (*pseudo* dt,  $^3J_{\text{HH}} = 7.9$  Hz,  $J = 1.2$  Hz, 1H, *meta-H*), 5.93 (s, 10H, Cp), 2.60 – 2.53 (m, 2H, 11-H), 2.27 (tt,  $^3J_{\text{HH}} = 6.4$  Hz,  $^4J_{\text{HH}} = 2.2$  Hz, 2H, 8-H), 1.76 – 1.70 (m, 2H, 9-H), 1.54 – 1.49 (m, 2H, 10-H).

**$^1\text{H}$  NMR (500 MHz,  $\text{C}_6\text{D}_6$ ):** 6.89 (*pseudo* q,  $J = 7.9$  Hz, 1H, *para-H*), 6.55 (*pseudo* dt,  $^3J_{\text{HH}} = 7.9$  Hz,  $J = 1.2$  Hz, 1H, *meta-H*), 6.02 (s, 10H, Cp), 5.89 (*pseudo* dt,  $^3J_{\text{HH}} = 8.0$  Hz,  $J = 1.2$  Hz, 1H, *meta-H*), 3.04 – 2.99 (m, 2H, 11-H), 2.17 (tt,  $^3J_{\text{HH}} = 6.4$  Hz,  $^4J_{\text{HH}} = 2.2$  Hz, 2H, 8-H), 1.84 – 1.77 (m, 2H, 9-H), 1.76 – 1.70 (m, 2H, 10-H).

**$^{19}\text{F}$  NMR (471 MHz,  $\text{C}_6\text{D}_{12}$ ):** 33.7 (s, 1F, F–Zr), –64.5 (d,  $J = 7.6$  Hz, 1F, *ortho-F*).

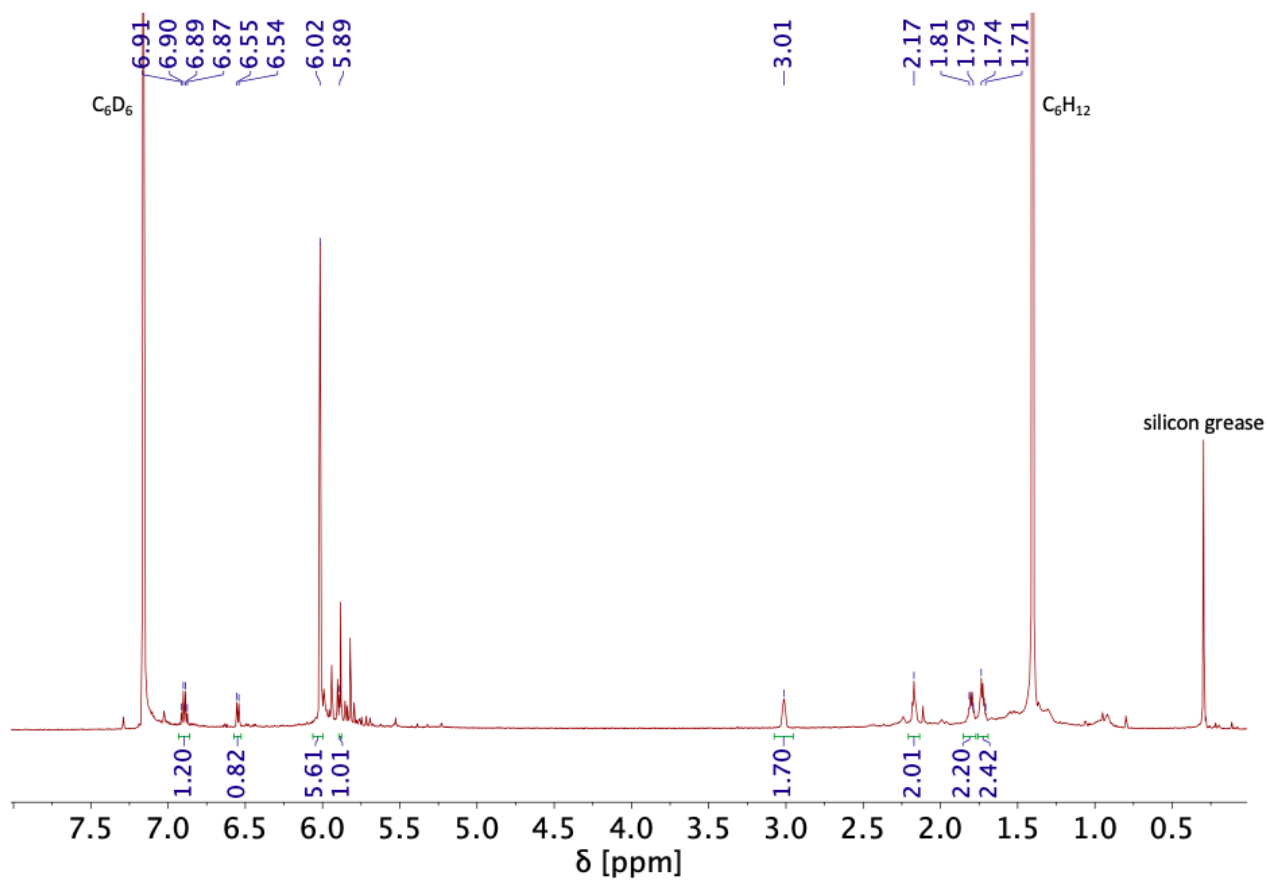

Figure S6  $^1\text{H}$  NMR (600 MHz,  $\text{C}_6\text{D}_6$ ) spectrum of the crude reaction mixture of the reaction between the zirconocene- $\text{PMe}_3$  adduct **1** (1 equiv.) with **Py-F<sub>2</sub>** (3 equiv.) in cyclohexane at 40 °C for 3 days, dried and dissolved in  $\text{C}_6\text{D}_6$ .



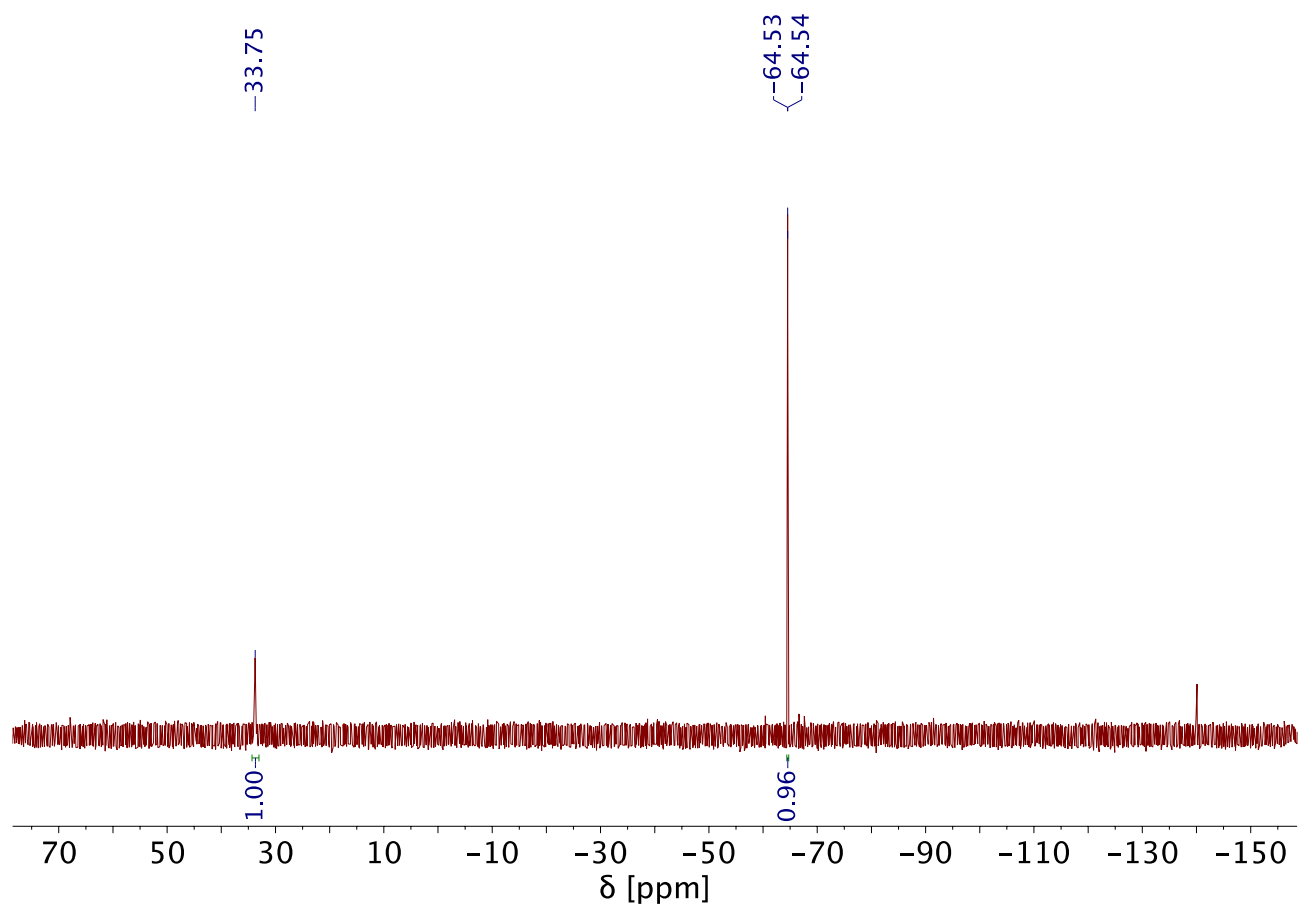

Figure S7  $^{19}\text{F}$  NMR (565 MHz,  $\text{C}_6\text{D}_6$ ) spectrum of the crude reaction mixture of the reaction between the zirconocene- $\text{PMe}_3$  adduct **1** (1 equiv.) with **Py-F<sub>2</sub>** (3 equiv.) in cyclohexane at 40 °C for 3 days, dried and dissolved in  $\text{C}_6\text{D}_6$ .

### 1.10 Procedure for the synthesis of complex 5 and its iodinolysis

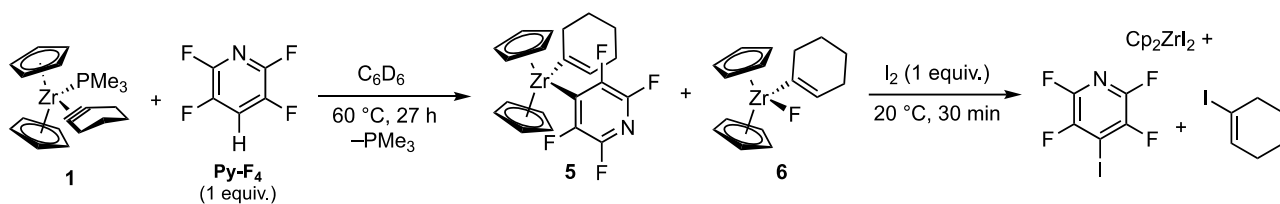

The following manipulation was carried out in an Ar-filled glovebox. Complex **1** (15.0 mg, 0.04 mmol, 1.0 equiv.) was dissolved in cyclohexane (0.7 mL) in an NMR tube equipped with a J. S. Young's valve. 2,3,5,6-tetrafluoropyridine (4.2  $\mu\text{L}$ , 0.04 mmol, 1.0 equiv.) was added and the mixture was kept at 60 °C and monitored by  $^1\text{H}$ ,  $^{31}\text{P}$  and  $^{19}\text{F}$  NMR. A small amount of dark red solid was formed during the reaction. After 48 hours at 60 °C, complex **5** (45% NMR yield), **6** (6% NMR yield) and unreacted **1** (9%) were observed in the  $^1\text{H}$  and  $^{19}\text{F}$  NMR spectra. At longer times, a decrease of the concentration of **5** along with an increase of the concentration of **6** were observed (e.g., after 48 hours at 60 °C, **5** was present in 45% NMR yield, **6** in 9% NMR yield). This mixture was dried under reduced pressure, dissolved in 0.6 mL of  $\text{C}_6\text{D}_6$  and  $\text{I}_2$  (9.6 mg, 0.04 mmol, 1 equiv.) was added to afford a mixture of 2,4-difluoro-6-(2-iodocyclohexen-1-yl)-pyridine and  $\text{Cp}_2\text{ZrI}_2$  after 30 min reaction time at 20 °C.

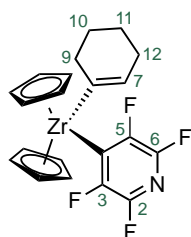

$^1\text{H}$  NMR (400 MHz,  $\text{C}_6\text{D}_6$ ):  $\delta$  5.40 (s, 10H, Cp), 5.09 – 5.00 (m, 1H, 7-*H*), 2.40 – 2.31 (m, 2H, 9-*H*), 1.97 – 1.87 (m, 2H, 12-*H*), 1.53 – 1.38 (m, 4H, 10-*H*, 11-*H*).

$^{19}\text{F}$  NMR (377 MHz,  $\text{C}_6\text{D}_6$ ): -97.7 (mc, 2F, *ortho*-F), -114.8 (mc, 2F, *meta*-F).

**1-iodocyclohexene:**

$^1\text{H}$  NMR (400 MHz,  $\text{C}_6\text{D}_6$ ): 6.17 – 6.13 (m, 1H, vinyl-*H*), 2.31 – 2.25 (m, 2H,  $\text{CH}_2$ ), 1.68 – 1.60 (m, 2H,  $\text{CH}_2$ ), 1.26 – 1.18 (m, 2H,  $\text{CH}_2$ ).

$^{13}\text{C}\{^1\text{H}\}$  NMR (101 MHz,  $\text{C}_6\text{D}_6$ ): 138.1 (s, 2-C), 97.0 (s, 1-C), 39.6 (s, 3-C), 29.0 (s, 2-C), 25.3 (s, 4-C), 20.9 (s, 4-C).

The NMR analysis is in agreement with that reported in the literature.<sup>7</sup>

### 2,3,5,6-tetrafluoro-4-iodopyridine:

$^{19}\text{F}$  NMR (376 MHz,  $\text{C}_6\text{D}_6$ ):  $-90.2$  (mc, 2F, *ortho*-F),  $-123.5$  (mc, 2F, *meta*-F).

The NMR analysis is in agreement with that reported in the literature.<sup>8</sup>

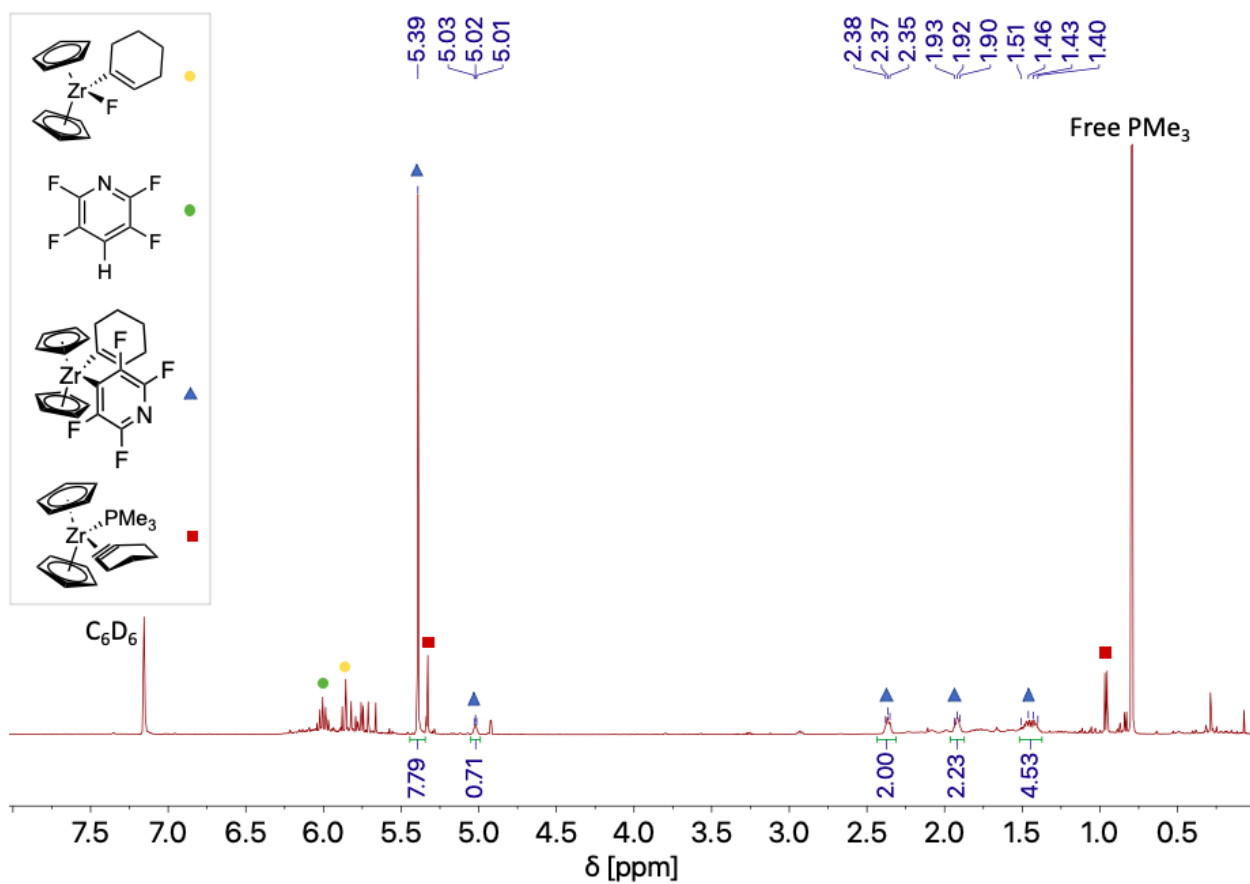

Figure S8  $^1\text{H}$  NMR (400 MHz,  $\text{C}_6\text{D}_6$ ) spectrum of the crude reaction mixture of the reaction between the zirconocene- $\text{PMe}_3$  adduct **1** (1 equiv.) with **Py-F<sub>4</sub>** (1 equiv.) in  $\text{C}_6\text{D}_6$  at 60 °C for 27 hours.

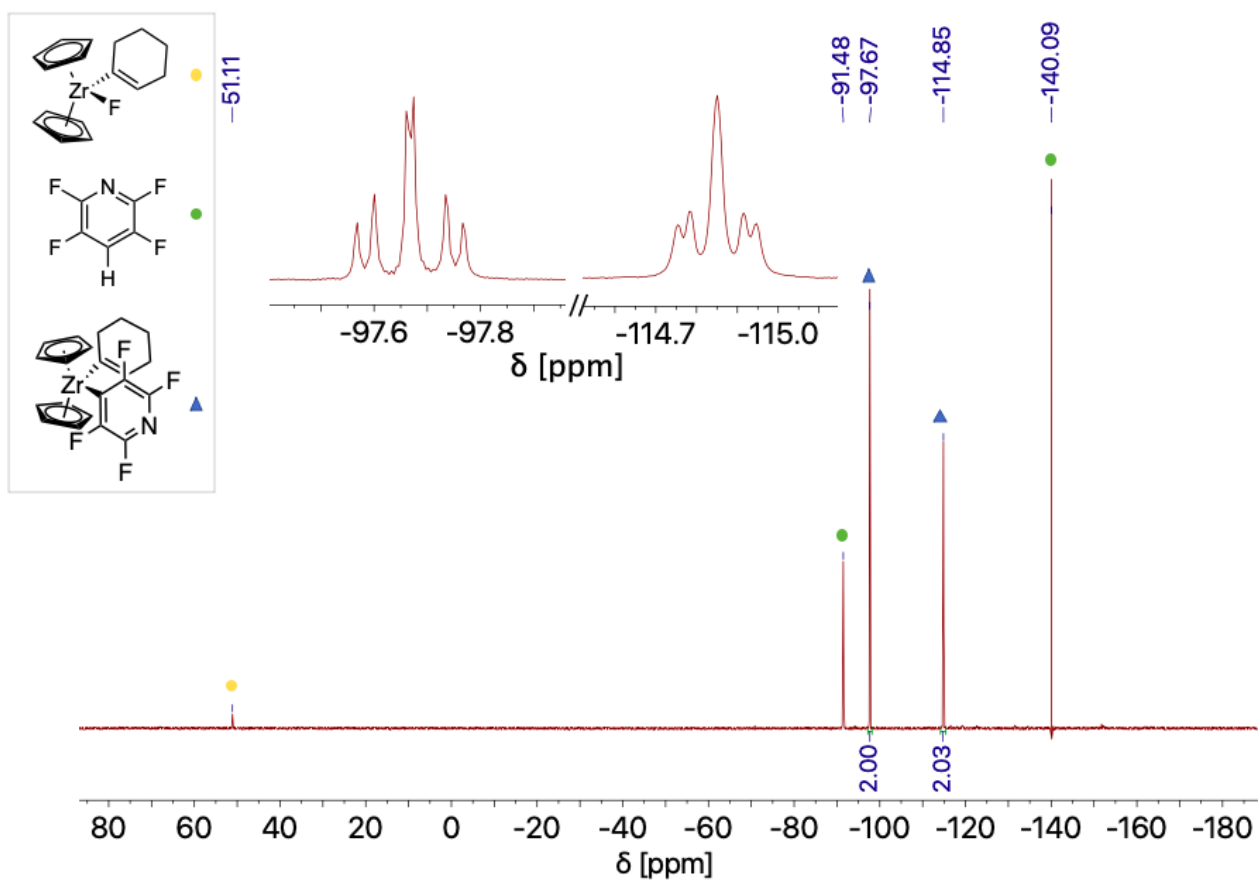

Figure S9  $^{19}\text{F}$  NMR (377 MHz,  $\text{C}_6\text{D}_6$ ) spectrum of the crude reaction mixture of the reaction between the zirconocene- $\text{PMe}_3$  adduct **1** (1 equiv.) with **Py-F<sub>4</sub>** (1 equiv.) in  $\text{C}_6\text{D}_6$  at 60 °C for 27 hours.

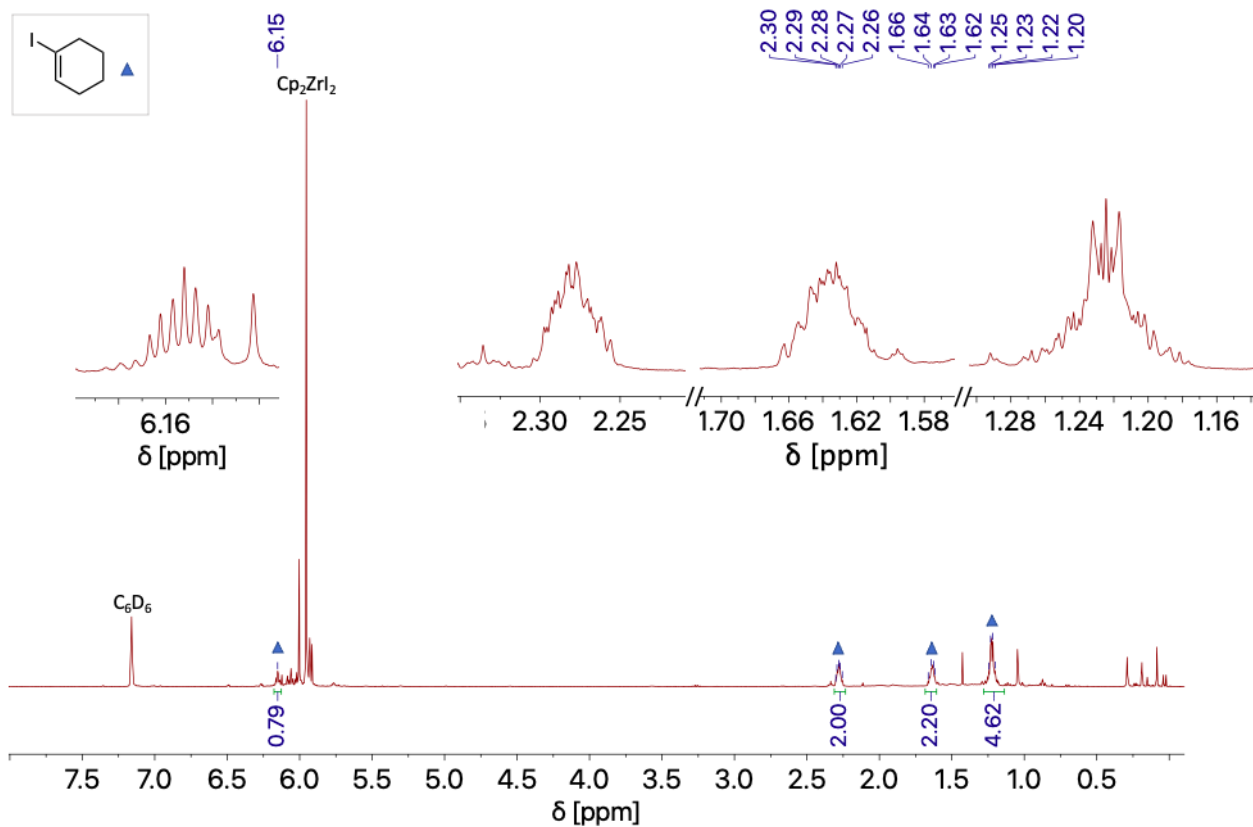

Figure S10 <sup>1</sup>H NMR (400 MHz, C<sub>6</sub>D<sub>6</sub>) spectrum of the crude reaction mixture of the reaction between the zirconocene-PMe<sub>3</sub> adduct **1** (1 equiv.) with **Py-F<sub>4</sub>** (1 equiv.) in C<sub>6</sub>D<sub>6</sub> at 60 °C for 27 hours, after the addition of I<sub>2</sub> (1 equiv., 20 °C, 30 min).

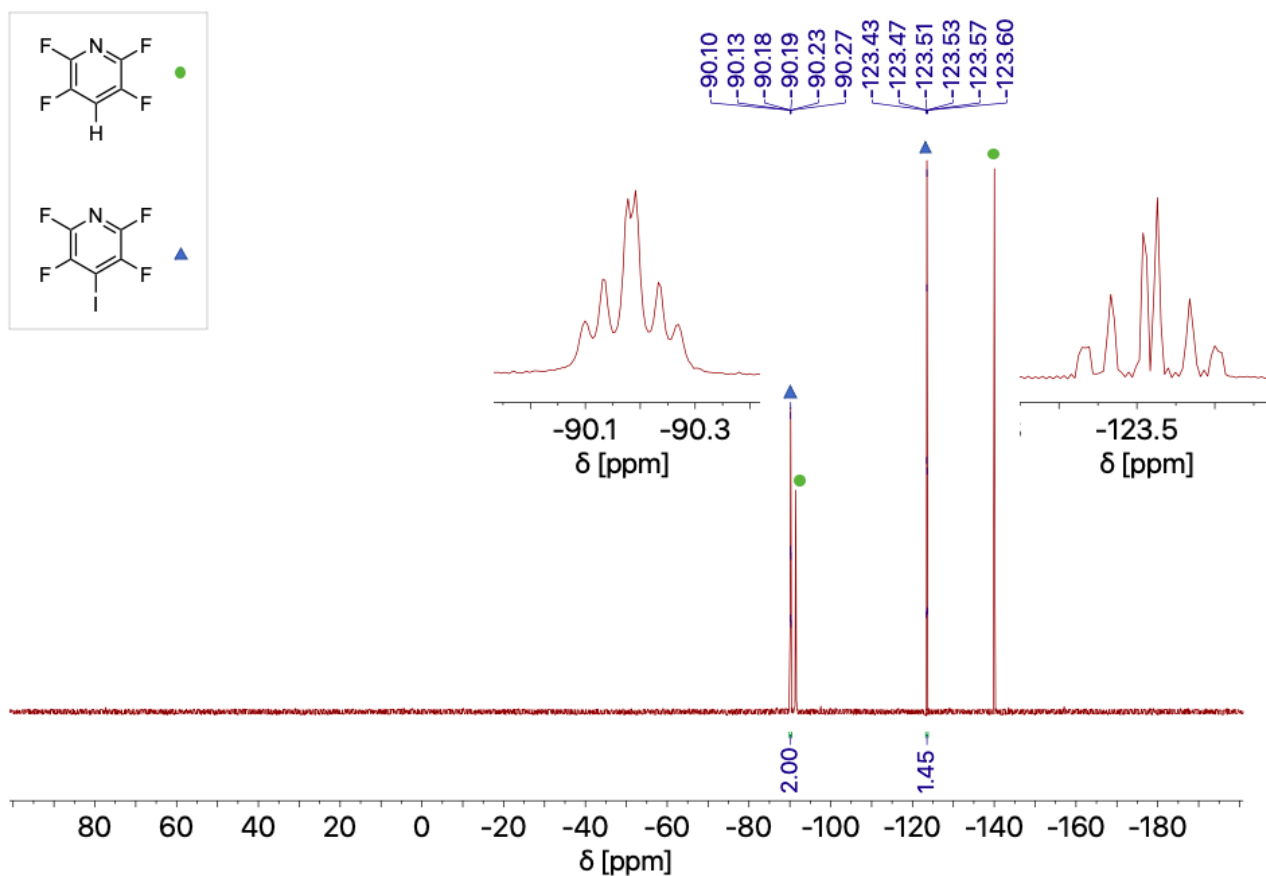

Figure S11  $^{19}\text{F}$  NMR (377 MHz,  $\text{C}_6\text{D}_6$ ) spectrum of the crude reaction mixture of the reaction between the zirconocene- $\text{PMe}_3$  adduct **1** (1 equiv.) with **Py-F<sub>4</sub>** (1 equiv.) in  $\text{C}_6\text{D}_6$  at 60 °C for 27 hours, after the addition of  $\text{I}_2$  (1 equiv., 20 °C, 30 min).

### 1.11 Study of the reactivity of the zirconocene-cyclohexyne transient intermediate with Py-F<sub>5</sub>

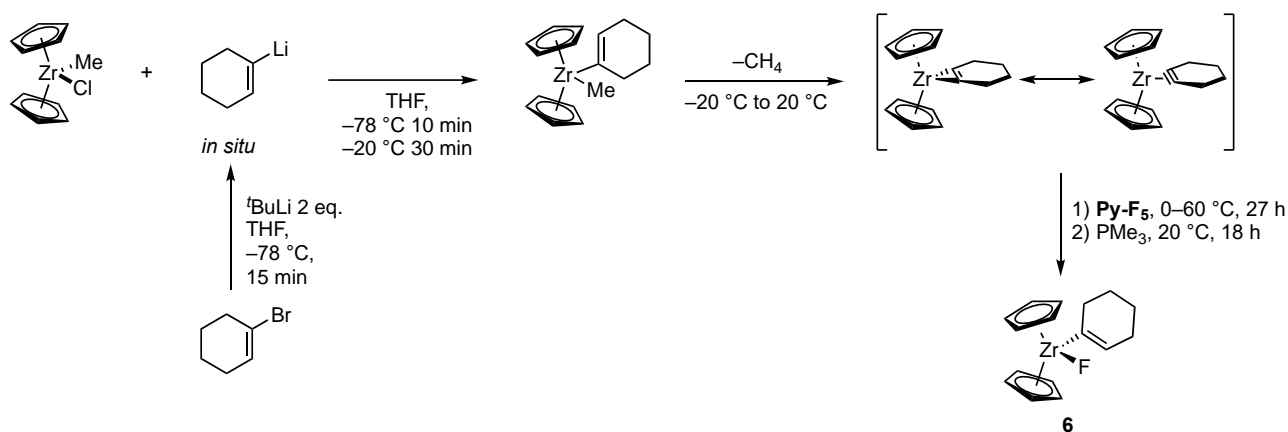

To a Schlenk flask under argon was added dry THF (5 mL) and cooled to -78 °C. *t*-BuLi in pentane 1.72 M (1.6 mL, 2.7 mmol, 2.1 equiv.) was added under stirring. 1-Bromocyclohexene (0.22 g, 1.4 mmol, 1.1 equiv.) was added to the solution dropwise, *via* syringe and the yellow reaction mixture was allowed to stir at -78 °C for 15 minutes. The 1-lithiocyclohexene, so formed, was added dropwise *via* cannula to a -78 °C solution of methylzirconocene chloride (0.35 g, 1.31 mmol, 1.0 equiv.) in THF (7 mL). The reaction mixture was stirred for 10 minutes at -78 °C and was then warmed to -20 °C and stirred for an additional 10 min. Py-F<sub>5</sub> (0.2 mL, 2.0 mmol, 1.5 equiv.) was added into the solution. The system was heated up to 60 °C for 27 hours and monitored by <sup>19</sup>F NMR spectroscopy. As no substantial change was observed in the <sup>19</sup>F NMR spectra over time, 1.6 equivalents of PMe<sub>3</sub> (0.81 mL, 8.0 mmol, 1.6 equiv.) were added and the system was kept at 20 °C for 18 hours. The progress of the reaction was monitored by <sup>19</sup>F and <sup>31</sup>P NMR. After this time, the formation of a dark red solid was observed. The <sup>19</sup>F NMR spectrum displayed a singlet at 51.0 ppm corresponding to complex **6** and many signals in the area of the *ortho*- and *meta*-F of the pyridine ring. The <sup>31</sup>P NMR spectrum displayed only traces of F<sub>2</sub>PET<sub>3</sub> and other difluorophosphanes that could not be unambiguously identified.

### 1.12 Procedure for the synthesis of 6

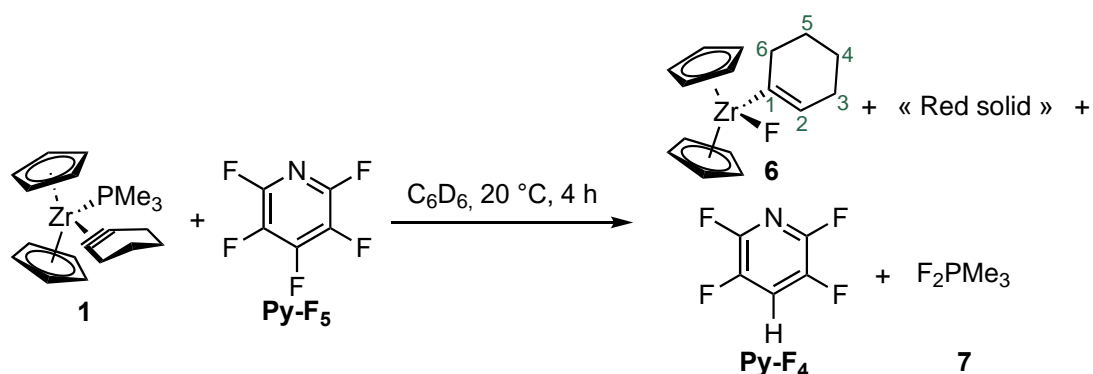

The following manipulation was carried out in an Ar-filled glovebox. Complex **6** (15.0 mg, 0.04 mmol, 1.0 equiv.) was dissolved in cyclohexane (0.7 mL) in an NMR tube equipped with a J. S. Young's valve. Pentafluoropyridine (93.3  $\mu$ L of a 0.43 M in cyclohexane, 0.04 mmol, 1.0 equiv.) was added and the mixture was kept at 20 °C for 5 hours. 6.3 mg of unidentified dark red solid precipitated from the solution.  $^1\text{H}$ ,  $^{19}\text{F}$  and  $^{31}\text{P}$  NMR analyses showed the complete consumption of **1** and the formation of complex **6** (62% NMR yield), together with small amounts of **Py-F<sub>4</sub>** (9% NMR yield) and **7** (1% NMR yield). Other unidentified minor species were observed by  $^{19}\text{F}$  and  $^1\text{H}$  NMR analysis.

$^1\text{H}$  NMR (400 MHz,  $\text{C}_6\text{D}_6$ ): 6.04 – 5.98 (m, 1H, 2-H), 5.86 (s, 10H, Cp), 2.14 – 2.04 (m, 4H, 3-H, 6-H), 1.70 – 1.65 (m, 4H, 4-H, 5-H).

$^{19}\text{F}$  NMR (377 MHz,  $\text{C}_6\text{D}_6$ ): 51.0 (s, Zr-F).

$^{13}\text{C}\{^1\text{H}\}$  NMR (101 MHz,  $\text{C}_6\text{D}_6$ ): 185 (s, 1-C), 126 (s, 2-C), 113 (s, Cp), 35.1 (s, 3-C), 28.3 (s, 6-C), 25.5 (s, 5-C), 23.8 (s, 4-C).

**Elemental analyses** of two different samples of the red solid: sample 1 • C 35.46%, H 2.74%, N 3.64%; sample 3 • C 34.81%, H 4.85%, N 3.50%. Low quantity of sample 2 were collected, enough for ICP-OES but not for elemental analysis

| Sample | test | Zr ppm | P ppm | Mass (mg) | Vol (mL) | Zr %  | P %    |
|--------|------|--------|-------|-----------|----------|-------|--------|
| 1      | 1    | 1.849  | 21.37 | 9.36      | 50       | 0.988 | 11.416 |
|        | 2    | 1.83   | 21.52 | 9.36      | 50       | 0.978 | 11.496 |
| 2      | 3    | 0.903  | 5.008 | 8.91      | 50       | 0.507 | 2.81   |
|        | 4    | 0.7708 | 4.937 | 8.91      | 50       | 0.433 | 2.77   |
| 3      | 5    | 3.219  | 14.95 | 10.8      | 50       | 1.49  | 6.921  |
|        | 6    | 3.233  | 15    | 10.8      | 50       | 1.497 | 6.944  |

Table S2. ICP-OES measurements of Zr and P contents run on three different samples of the red solid.



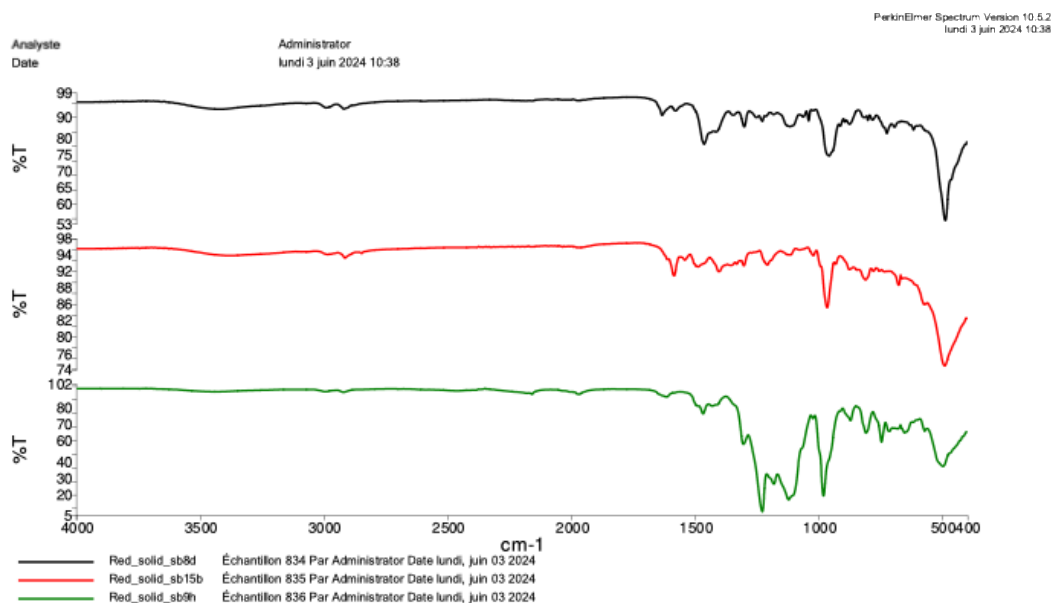

Figure S12. Stacked IR spectra of different samples of the red solid.

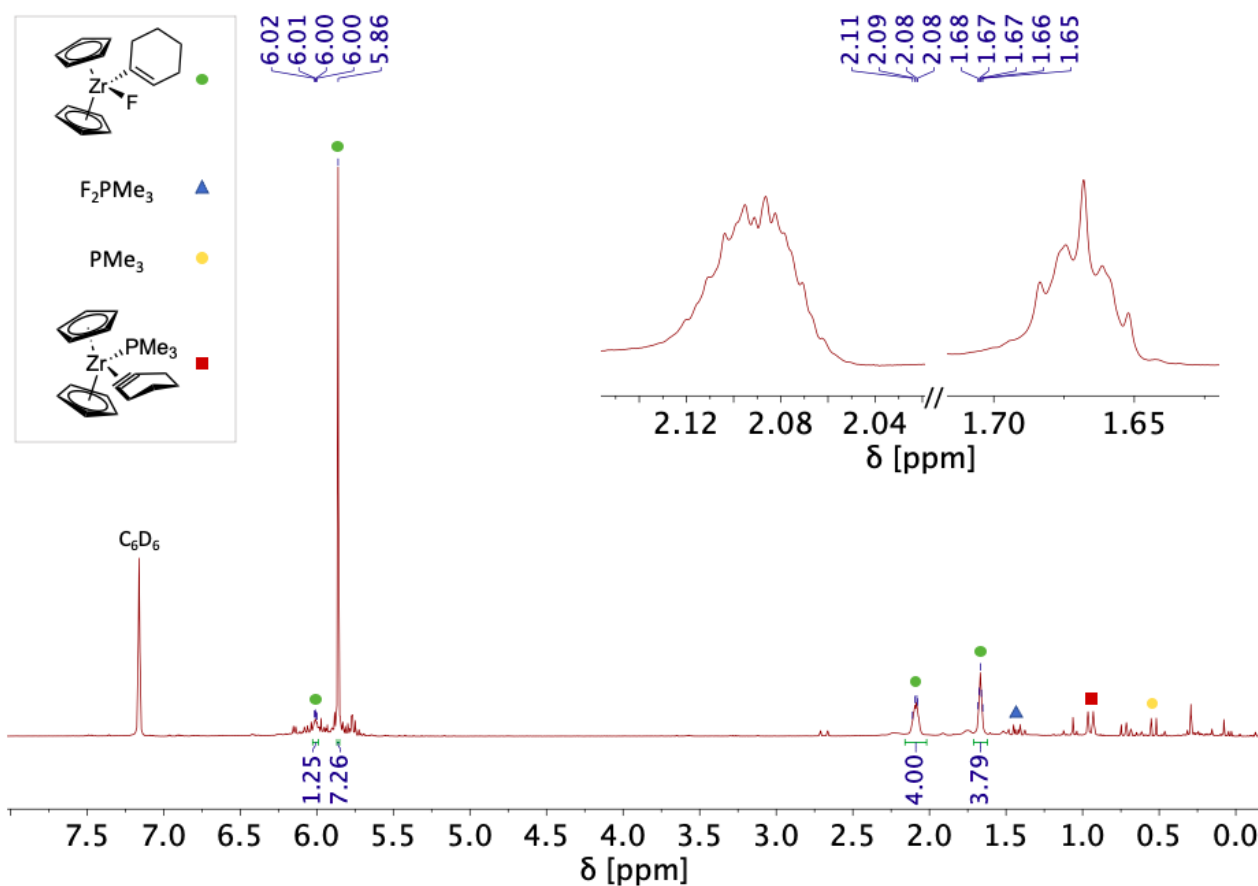

Figure S13 <sup>1</sup>H NMR (400 MHz, C<sub>6</sub>D<sub>6</sub>) spectrum of the crude reaction mixture of the reaction between the zirconocene-PMe<sub>3</sub> adduct **1** (1 equiv.) with **Py-F<sub>5</sub>** (1 equiv.) in C<sub>6</sub>D<sub>6</sub> at 20 °C after 4 hours.

### 1.13 Procedure for the ligand liberation of complex 6 via HCl addition

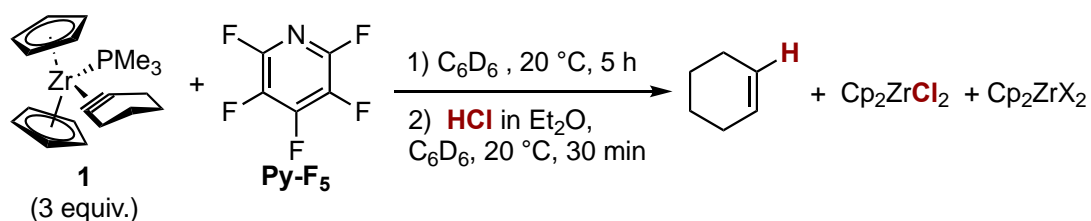

Complex **1** (15.0 mg, 0.04 mmol, 3.0 equiv.) was dissolved in cyclohexane (0.7 mL) in an NMR tube equipped with a J. S. Young's valve. Pentafluoropyridine (31.1  $\mu\text{L}$  of a 0.43 M in cyclohexane, 0.01 mmol, 1.0 equiv.) was added and the mixture was kept at 20  $^\circ\text{C}$  for 5 hours. HCl (2M in  $\text{Et}_2\text{O}$ , 0.02 mL, 0.04 mmol, 3.0 equiv.) was added into the mixture. After 30 minutes at 20  $^\circ\text{C}$ , the disappearance of 1-cyclohexenylzirconocene fluoride and the formation of cyclohexene,  $\text{Cp}_2\text{ZrCl}_2$  and other  $\text{Cp}_2\text{ZrX}_2$  that could not be unambiguously identified were detected by  $^{19}\text{F}$  and  $^1\text{H}$  NMR spectroscopy.<sup>9</sup>

$^1\text{H}$  NMR (400 MHz,  $\text{C}_6\text{D}_6$ ):  $\delta$  5.67 (t,  $J = 1.5$  Hz, 2H), 1.93 – 1.87 (m, 4H), 1.53 – 1.48 (m, 4H).

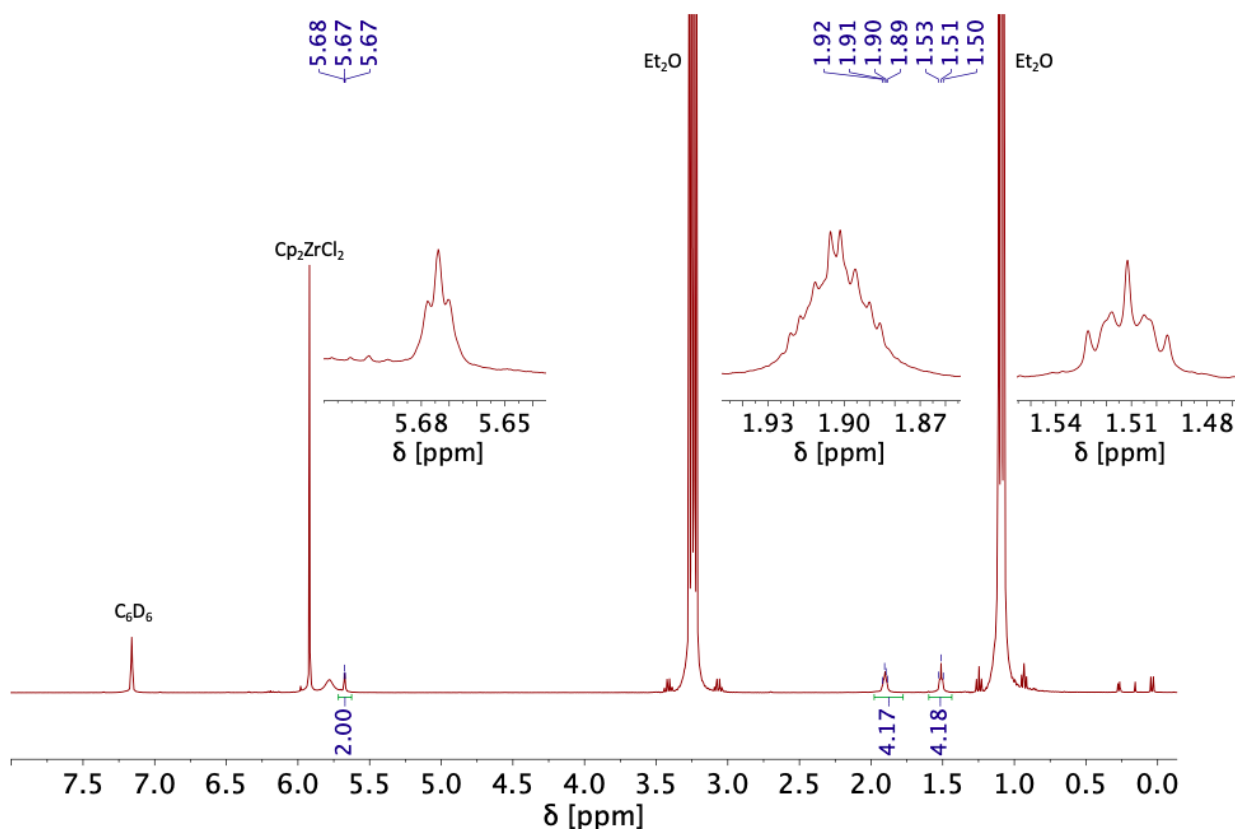

Figure S14  $^1\text{H}$  NMR (400 MHz,  $\text{C}_6\text{D}_6$ ) spectrum of the crude reaction mixture obtained after 30 min at 20  $^\circ\text{C}$  from the addition of HCl (2M in  $\text{Et}_2\text{O}$ , 3 equiv.) to the mixture obtained in section 1.12.

### 1.14 Procedure for the ligand liberation of complex 6 via I<sub>2</sub> addition

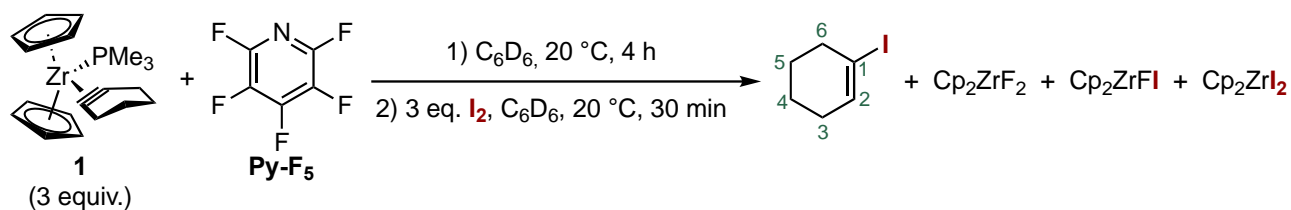

The following manipulation was carried out in an Ar-filled glovebox. Complex **1** (15.0 mg, 0.04 mmol, 3.0 equiv.) was dissolved in cyclohexane (0.7 mL) in an NMR tube equipped with a J. S. Young's valve. Pentafluoropyridine (31.1  $\mu$ L of a 0.43 M in cyclohexane, 0.01 mmol, 1.0 equiv.) was added and the mixture was kept at 20 °C for 4 hours. The dark red solid formed during the reaction was filtered, the filtrate was dried under reduced pressure and dissolved in 0.6 mL of C<sub>6</sub>D<sub>6</sub>. I<sub>2</sub> (10.0 mg, 0.04 mmol, 3.0 equiv.) was added to afford a mixture of 1-iodocyclohexene, Cp<sub>2</sub>ZrF<sub>2</sub>, Cp<sub>2</sub>ZrFI, Cp<sub>2</sub>ZrI<sub>2</sub> after 30 min reaction time at 20 °C. The mixture was passed through a celite column to remove the Zr complexes and analysed by <sup>1</sup>H and <sup>13</sup>C NMR spectroscopy.

<sup>1</sup>H NMR (400 MHz, C<sub>6</sub>D<sub>6</sub>): 6.15 (tt, <sup>3</sup>J<sub>HH</sub> = 4.0 Hz, <sup>4</sup>J<sub>HH</sub> = 1.8 Hz, 1H, 2-H), 2.33 – 2.23 (m, 2H, 3-H), 1.68 – 1.60 (m, 2H, 3-H), 1.25 – 1.18 (m, 4H, 4-H).

<sup>13</sup>C{<sup>1</sup>H} NMR (101 MHz, C<sub>6</sub>D<sub>6</sub>): 138.1 (s, 2-C), 97.0 (s, 1-C), 39.6 (s, 3-C), 29.0 (s, 2-C), 25.3 (s, 4-C), 20.9 (s, 4-C).

The NMR analysis is in agreement with that reported in the literature.<sup>7</sup>

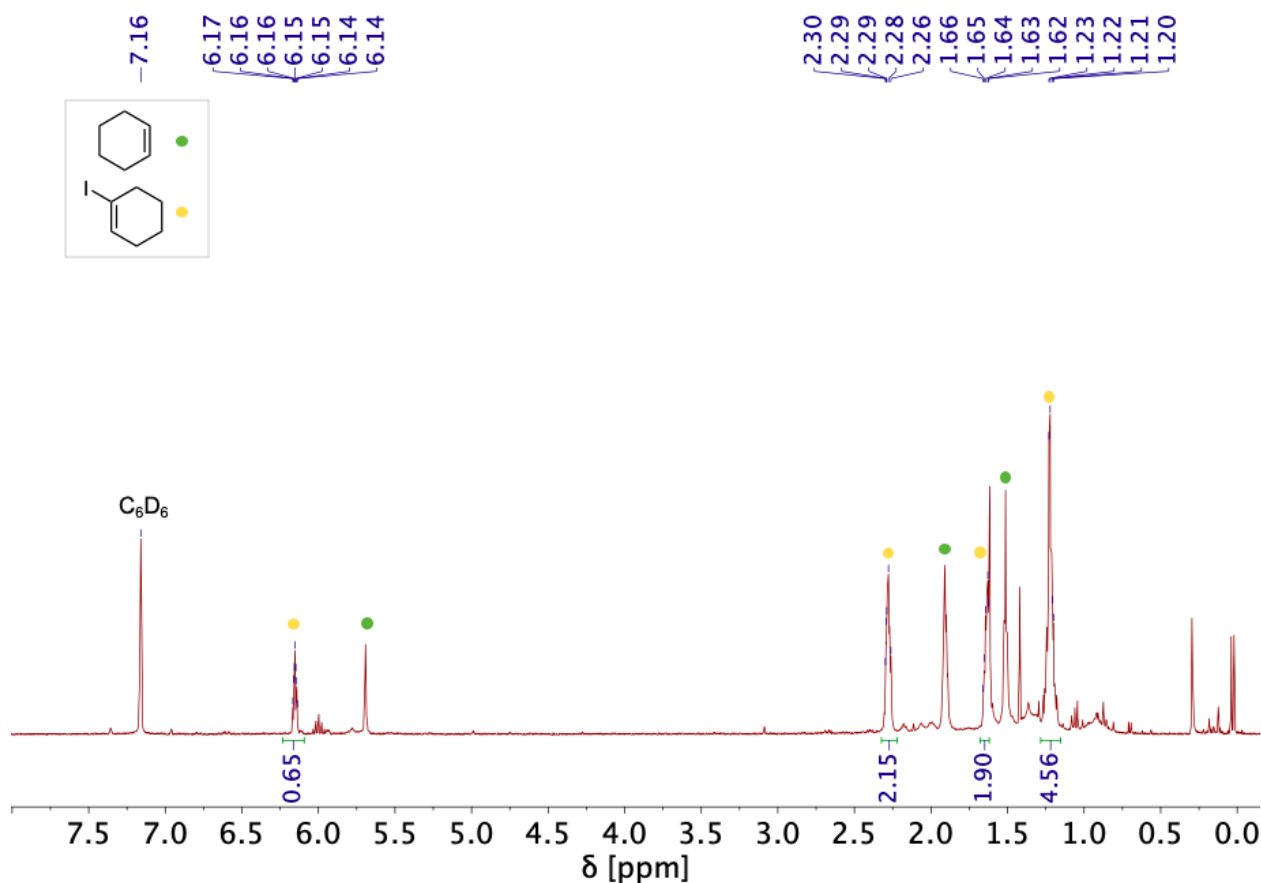

Figure S15  $^1\text{H}$  NMR (400 MHz,  $\text{C}_6\text{D}_6$ ) spectrum of the reaction mixture obtained after 30 min at 20 °C from the addition of  $\text{I}_2$  (3 equiv.) to the mixture obtained in section 1.12 and subsequently passed through a celite column.

### 1.15 Study on the solvent optimisation for the synthesis of complex **6**

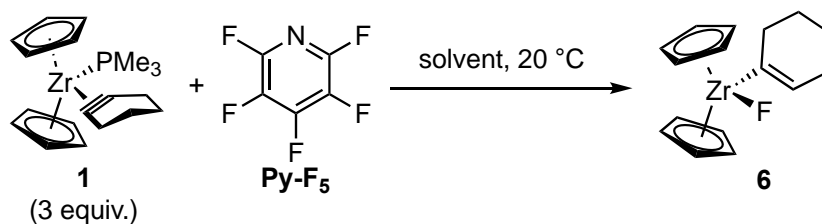

The following manipulation was carried out in an Ar-filled glovebox. Complex **1** (15.0 mg, 0.04 mmol, 3.0 equiv.) was dissolved in 0.7 mL of the tested solvent (i.e.,  $\text{C}_6\text{D}_6$ , toluene- $d_8$ , cyclohexane, THF- $d_8$ ) in an NMR tube equipped with a J. S. Young's valve. Pentafluoropyridine (31.1  $\mu\text{L}$  of a 0.43 M in cyclohexane, 0.01 mmol, 1.0 equiv.) was added and the mixture was monitored over time by  $^1\text{H}$ ,  $^{31}\text{P}$  and  $^{19}\text{F}$  NMR spectroscopy. The reaction in cyclohexane proved to be slightly more selective towards **6** than the other solvent tested.

### 1.16 Study on the temperature optimisation for the synthesis of complex 6

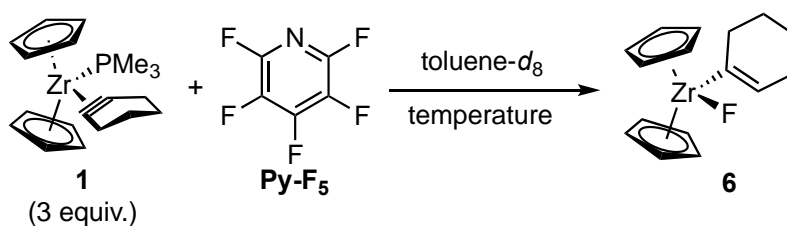

The following manipulation was carried out in an Ar-filled glovebox. Complex **1** (15.0 mg, 0.04 mmol, 3.0 equiv.) was dissolved in 0.7 mL of toluene-*d*<sub>8</sub> in an NMR tube equipped with a J. S. Young's valve. Pentafluoropyridine (31.1 μL of a 0.43 M in cyclohexane, 0.01 mmol, 1.0 equiv.) was added and the mixture was kept at variable temperatures (−40 °C, 0 °C) and monitored over time by <sup>1</sup>H, <sup>31</sup>P and <sup>19</sup>F NMR spectroscopy. No significant differences in the reaction outcome were observed.

### 1.17 Study on the concentration optimisation for the synthesis of complex 6

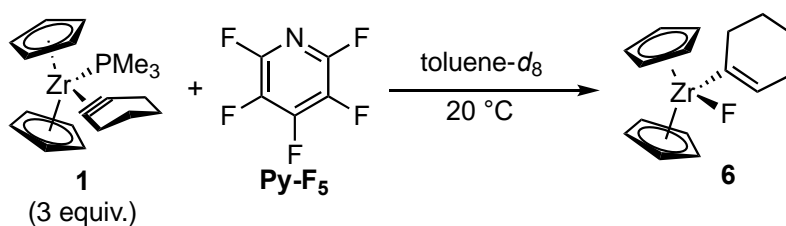

The following manipulation was carried out in an Ar-filled glovebox. Complex **1** (0.1 M, 0.3 M) was dissolved in 0.7 mL of toluene-*d*<sub>8</sub> in an NMR tube equipped with a J. S. Young's valve. Pentafluoropyridine (0.03 M, 0.1 M) was added and the mixture was monitored over time by <sup>1</sup>H, <sup>31</sup>P and <sup>19</sup>F NMR spectroscopy. No significant differences in the reaction outcome were observed.

### 1.18 Study on the reagent ratio optimisation for the synthesis of complex 6

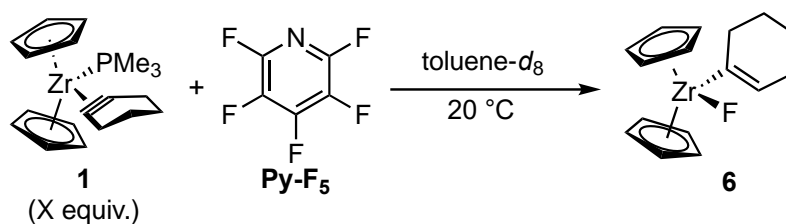

The following manipulation was carried out in an Ar-filled glovebox. Different ratios of complex **6** and pentafluoropyridine (1:1, 3:1, 1:3, 5:1) were dissolved in 0.7 mL of toluene-*d*<sub>8</sub> in an NMR tube equipped with a J. S. Young's valve. The mixture was monitored over time by <sup>1</sup>H, <sup>31</sup>P and <sup>19</sup>F NMR spectroscopy. No significant differences in the reaction outcome were observed using different reagent ratios. 3 equivalents of complex **1** were needed to consume all **Py-F<sub>5</sub>**.

### 1.19 Procedure for the reactivity test of **1** with difluorophosphoranes **8** and $F_2PMe_3$

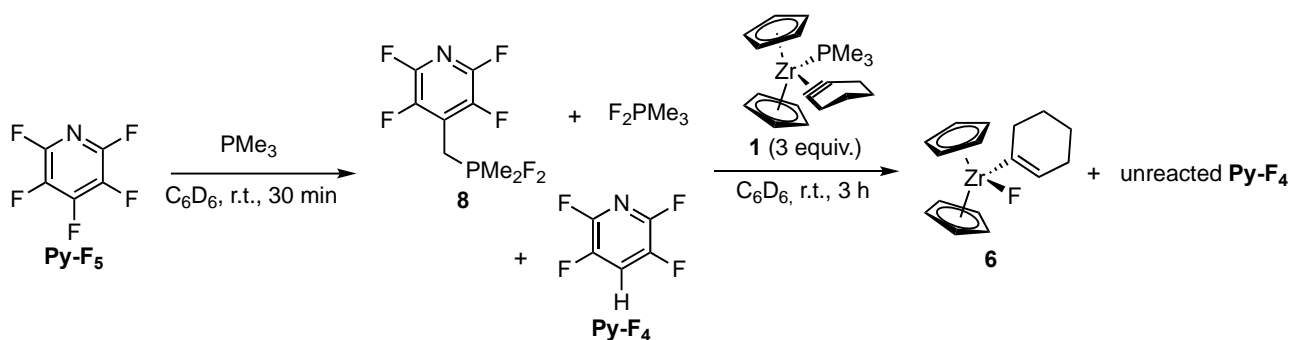

In an Ar-filled glovebox,  $PMe_3$  (4.0  $\mu L$ , 0.04 mmol, 1.0 equiv.) was added using a Hamilton<sup>®</sup> micro-syringe to  $C_6D_6$  (0.6 mL) in an NMR tube equipped with a J. S. Young's valve. Pentafluoropyridine (4.2  $\mu L$ , 0.04 mmol, 1.0 equiv.) was added using a Hamilton<sup>®</sup> micro-syringe into the solution which became instantly orange. After 30 minutes at 20 °C, complex **1** (45.2 mg, 0.12 mmol, 3.0 equiv.) was added. 3.0 equiv. of **1** were needed to completely consume **8** and  $F_2PMe_3$  by  $^{19}F$  NMR spectroscopy. The formation of a dark red solid was observed. **6** and unreacted **Py-F<sub>4</sub>** were identified by  $^1H$  and  $^{19}F$  NMR analysis.

#### Trimethyldifluorophosphorane:

$^1H$  NMR (400 MHz,  $C_6D_6$ ): 1.42 (dt,  $^2J_{HP} = 17.3$  Hz,  $^3J_{HF} = 12.3$  Hz, 2H,  $CH_3$ ).

$^{19}F$  NMR (377 MHz,  $C_6D_6$ ): -5.5 (dm,  $^1J_{PF} = 544.1$  Hz, 2F,  $F_2P$ ).

$^{31}P$  NMR (162 MHz,  $C_6D_6$ ): -16.2 (tm,  $^1J_{PF} = 544.0$  Hz, 1P).

$^{13}C\{^1H\}$  NMR (101 MHz,  $C_6D_6$ ): 18.7 (dt,  $^1J_{PC} = 127.3$  Hz,  $^2J_{FC} = 29.4$  Hz, 2C,  $CH_3$ ).

The NMR analysis is in agreement with that reported in the literature.<sup>10</sup>

#### 2,3,5,6-tetrafluoropyridine (**Py-F<sub>4</sub>**):

$^1H$  NMR (600 MHz,  $C_6D_6$ ):  $\delta$  6.51 (tt,  $^3J_{HF} = 7.0$  Hz,  $^4J_{HF} = 7.7$  Hz, CH).

$^{19}F$  NMR (564 MHz,  $C_6D_6$ ):  $\delta$  -92.0 (mc, 2F, *ortho*-F), -140.3 (mc, 2F, *meta*-F).

The NMR analysis is in agreement with that reported in the literature.<sup>11</sup>

#### 4-methylenetetrafluoropyridine-substituted phosphorane (8):

$^1\text{H}$  NMR (400 MHz,  $\text{C}_6\text{D}_6$ ):  $\delta$  1.34 (dt,  $^2J_{\text{HP}} = 17.3$  Hz,  $^3J_{\text{HF}} = 12.5$  Hz, 6H,  $\text{CH}_3$ ), 3.09 (dtt,  $^2J_{\text{HP}} = 23.5$  Hz,  $^3J_{\text{HF}} = 5.0$  Hz,  $^4J_{\text{HF}} = 1.8$  Hz, 2H,  $\text{CH}_2$ ).

$^{19}\text{F}$  NMR (377 MHz,  $\text{C}_6\text{D}_6$ ):  $\delta$  -9.7 (dm,  $^1J_{\text{PF}} = 595.1$  Hz, 2F,  $\text{F}_2\text{P}$ ), -92.6 (mc, 2F, *ortho-F*), -144.5 (mc, 2F, *meta-F*).

$^{31}\text{P}$  NMR (162 MHz,  $\text{C}_6\text{D}_6$ ):  $\delta$  -20.5 (tm,  $J_{\text{PF}} = 595.0$  Hz,  $\text{PF}_2$ ).

$^{13}\text{C}\{^1\text{H}\}$  NMR (101 MHz,  $\text{C}_6\text{D}_6$ ):  $\delta$  142.9 – 141.5 (m, 2C, CF), 140.1 – 138.7 (m, 2C, CF), 129.5 – 128.4 (m, 1C,  $\text{C}(\text{sp}^2)\text{-CH}_2$ ), 27.9 (dt,  $^1J_{\text{CP}} = 123.2$  Hz,  $^2J_{\text{CF}} = 32.9$  Hz, 1C,  $\text{CH}_2$ ), 18.7 (dt,  $^1J_{\text{CP}} = 127.2$  Hz,  $^2J_{\text{CF}} = 28.9$  Hz, 2C,  $\text{CH}_3$ ).

GC(EI)-MS:  $[\text{C}_8\text{H}_8\text{F}_6\text{NP}]^{*+}$  263.02817,  $[\text{C}_8\text{H}_8\text{F}_6\text{NP}]^{*+}$  248.00528,  $[\text{C}_6\text{H}_2\text{F}_4\text{NP}]^{*+}$  164.01269,  $[\text{C}_2\text{H}_6\text{F}_2\text{P}]^{*+}$  99.01827  $m/z$ .

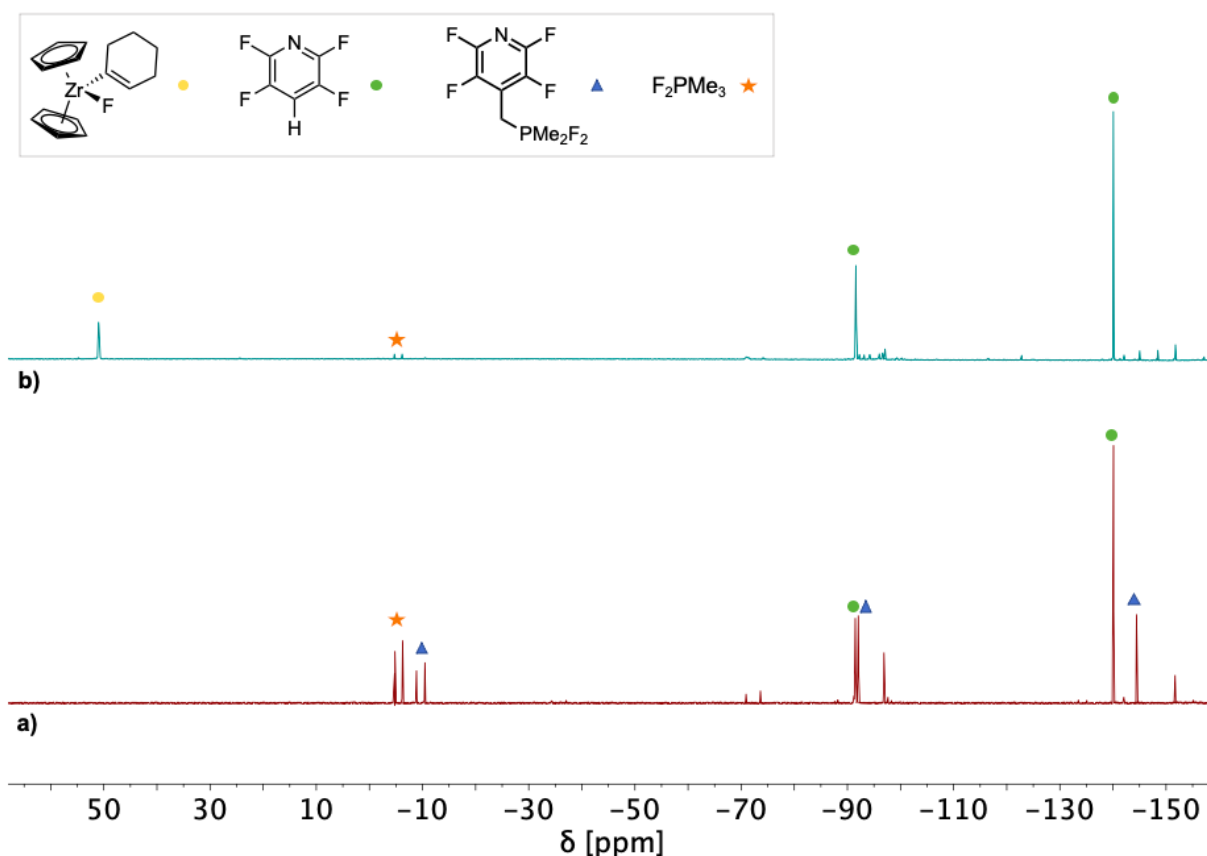

Figure S15  $^{19}\text{F}$  NMR (377 MHz,  $\text{C}_6\text{D}_6$ ) spectra of the crude reaction mixture between  $\text{PMe}_3$  and pentafluoropyridine (1:1, in  $\text{C}_6\text{D}_6$ ) (a) and after 3 hours from the addition of complex **1** (b).



## 2 X-ray crystal structure

### 2.1 Molecular structure of 3

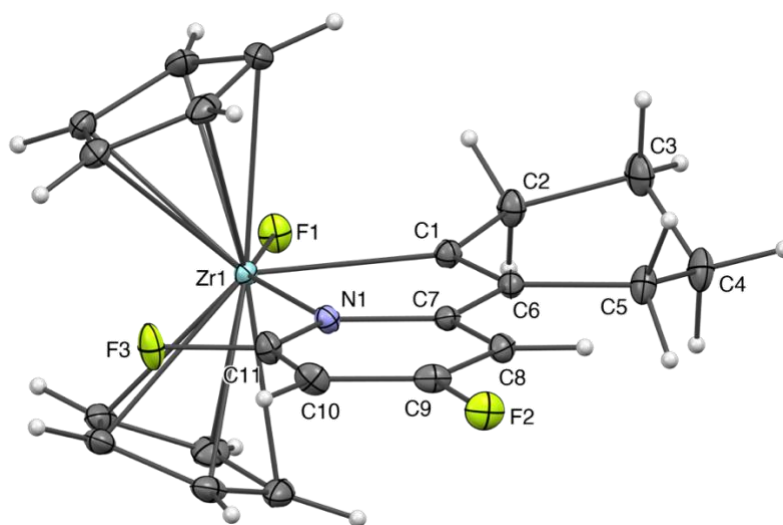

X-ray molecular structure of complex 3

| <b>Crystal data</b>                                                                                            |                                                    |
|----------------------------------------------------------------------------------------------------------------|----------------------------------------------------|
| Chemical formula                                                                                               | C <sub>21</sub> H <sub>20</sub> F <sub>3</sub> NZr |
| <i>M<sub>r</sub></i>                                                                                           | 434.60                                             |
| Crystal system, space group                                                                                    | Monoclinic, <i>P</i> 2 <sub>1</sub> / <i>n</i>     |
| Temperature (K)                                                                                                | 110                                                |
| <i>a</i> , <i>b</i> , <i>c</i> (Å)                                                                             | 8.1766 (1), 15.5546 (2), 14.6671 (2)               |
| β (°)                                                                                                          | 99.429 (1)                                         |
| <i>V</i> (Å <sup>3</sup> )                                                                                     | 1840.21 (4)                                        |
| <i>Z</i>                                                                                                       | 4                                                  |
| Radiation type                                                                                                 | Cu Kα                                              |
| μ (mm <sup>-1</sup> )                                                                                          | 5.19                                               |
| Crystal size (mm)                                                                                              | 0.25 × 0.1 × 0.09                                  |
| <b>Data collection</b>                                                                                         |                                                    |
| Diffractometer                                                                                                 | SuperNova                                          |
| Absorption correction                                                                                          | Gaussian                                           |
| <i>T</i> <sub>min</sub> , <i>T</i> <sub>max</sub>                                                              | 0.760, 1.000                                       |
| No. of measured, independent and observed [ <i>I</i> > 2σ( <i>I</i> )] reflections                             | 12546, 3722, 3429                                  |
| <i>R</i> <sub>int</sub>                                                                                        | 0.038                                              |
| (sin θ/λ) <sub>max</sub> (Å <sup>-1</sup> )                                                                    | 0.632                                              |
| <b>Refinement</b>                                                                                              |                                                    |
| <i>R</i> [ <i>F</i> <sup>2</sup> > 2σ( <i>F</i> <sup>2</sup> )], <i>wR</i> ( <i>F</i> <sup>2</sup> ), <i>S</i> | 0.025, 0.062, 1.10                                 |
| No. of reflection                                                                                              | 3722                                               |
| No. of parameters                                                                                              | 235                                                |
| H-atom treatment                                                                                               | All H-atom parameters refined                      |
| Δρ <sub>max</sub> , Δρ <sub>min</sub> (e Å <sup>-3</sup> )                                                     | 0.32, -0.47                                        |

## 2.2 Structural data comparison

| Compound                                                                           | Reference                                                                                                                                                                | Zr-C       | Zr-N                     | C $\alpha$ -C $\beta$ | C $\beta$ -C $\delta$ | C $\delta$ -N | N/C $\alpha$ -Zr-X | N-Zr-C $\alpha$ | Zr-C $\alpha$ -C $\beta$ | C $\alpha$ -C $\beta$ -C $\delta$ | C $\beta$ -C $\delta$ -N | C $\delta$ -N-Zr |
|------------------------------------------------------------------------------------|--------------------------------------------------------------------------------------------------------------------------------------------------------------------------|------------|--------------------------|-----------------------|-----------------------|---------------|--------------------|-----------------|--------------------------|-----------------------------------|--------------------------|------------------|
| 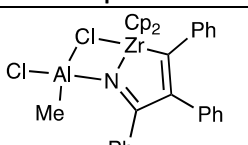  | Binger <i>et al. Organometallics</i> <b>1995</b> , <i>14</i> , 2969–2976.<br><a href="https://doi.org/10.1021/om00006a047">https://doi.org/10.1021/om00006a047</a> .     | 2.363(3)   | 2.228(2)                 | 1.359(4)              | 1.479(4)              | 1.285(3)      | 140.7(1)           | 71.9(1)         | 113.6(2)                 | 116.1(2)                          | 118.9(2)                 | 119.5(2)         |
|   | Zhao <i>et al. Organometallics</i> <b>2012</b> , <i>31</i> , 8370–8374.<br><a href="https://doi.org/10.1021/om300949a">https://doi.org/10.1021/om300949a</a> .           | 2.403(2)   | 2.2629(18)               | 1.360(3)              | 1.462(4)              | 1.288(3)      | 140.52(7)          | 69.04(7)        | 114.6(2)                 | 117.0(2)                          | 116.0(2)                 | 123.1(2)         |
|   | Becker <i>et al. Chem. Eur. J.</i> <b>2014</b> , <i>20</i> , 3061–3068.<br><a href="https://doi.org/10.1002/chem.201304478">https://doi.org/10.1002/chem.201304478</a> . | 2.4445(15) | 2.1256(12)               | 1.370(2)              | 1.506(2)              | 1.273(2)      | 142.76(5)          | 69.90(5)        | 114.02(10)               | 111.30(13)                        | 118.91(13)               | 125.08(10)       |
|   | Zhao <i>et al. Organometallics</i> <b>2011</b> , <i>30</i> , 3464–3467.<br><a href="https://doi.org/10.1021/om200404p">https://doi.org/10.1021/om200404p</a> .           | 2.407(4)   | 2.265(4)                 | 1.361(8)              | 1.473(6)              | 1.289(6)      | 139.8(1)           | 68.4(1)         | 115.5(3)                 | 116.2(4)                          | 115.5(4)                 | 123.4(3)         |
|  | Burlakov <i>et al. Eur. J. Inorg. Chem.</i> <b>2014</b> , 5304–5310.<br><a href="https://doi.org/10.1002/ejic.201402618">https://doi.org/10.1002/ejic.201402618</a> .    | 2.3640(15) | 2.2630(12)<br>2.3384(12) | 1.361(2)              | 1.487(2)              | 1.289(2)      | 140.49(5)          | 70.28(5)        | 117.6(1)                 | 112.1(1)                          | 120.8(1)                 | 119.1(1)         |

Table S3 Structural data of 2-aza-zirconacyclopentadienes.

|                                                                                   |                                                                                                                                                                 | Zr-C      | Zr-N     | C $_{\alpha}$ -C $_{\beta}$ | C $_{\beta}$ -C $_{\delta}$ | C $_{\delta}$ -N | C $_{\alpha}$ -Zr-X | N-Zr-C $_{\alpha}$ | Zr-C $_{\alpha}$ -C $_{\beta}$ | C $_{\alpha}$ -C $_{\beta}$ -C $_{\delta}$ | C $_{\beta}$ -C $_{\delta}$ -N | C $_{\delta}$ -N-Zr |
|-----------------------------------------------------------------------------------|-----------------------------------------------------------------------------------------------------------------------------------------------------------------|-----------|----------|-----------------------------|-----------------------------|------------------|---------------------|--------------------|--------------------------------|--------------------------------------------|--------------------------------|---------------------|
| 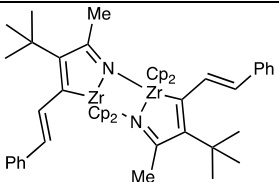 | Benderet <i>al. Dalton Trans.</i> <b>2013</b> , 42, 14673–14676.<br><a href="https://doi.org/10.1039/C3DT51497H">https://doi.org/10.1039/C3DT51497H</a> .       | 2.402(7)  | 2.247(5) | 1.347(9)                    | 1.498(9)                    | 1.286(8)         | 141.7(2)            | 71.0(2)            | 114.3(5)                       | 112.2(5)                                   | 120.4(4)                       | 118.6(4)            |
|  | Arndt <i>et al. Chem. Ber.</i> <b>1996</b> , 129, 207–211.<br><a href="https://doi.org/10.1002/cber.19961290214">https://doi.org/10.1002/cber.19961290214</a> . | 2.426(3)  | 2.301(3) | 1.373(5)                    | 1.458(4)                    | 1.287(4)         | 139.0(1)            | 69.2(10)           | 115.7(2)                       | 114.3(3)                                   | 120.9(3)                       | 119.8(2)            |
|  | Arndt <i>et al. Chem. Ber.</i> <b>1996</b> , 129, 207–211.<br><a href="https://doi.org/10.1002/cber.19961290214">https://doi.org/10.1002/cber.19961290214</a> . | 2.405(11) | 2.330(8) | 1.380(15)                   | 1.477(15)                   | 1.293(13)        | 134.6(1)            | 69.7(17)           | 114.8(7)                       | 113.9(4)                                   | 121.6(5)                       | 116.8(4)            |
|  | This work                                                                                                                                                       | 2.321(2)  | 2.479(2) | 1.354(3)                    | 1.456(3)                    | 1.372(3)         | 148.46(6)           | 68.34(7)           | 121.15(15)                     | 117.92(18)                                 | 116.37(18)                     | 115.83(13)          |

Table S3 (continued).

### 3 DFT calculations

#### 3.1 General Methods

DFT calculations were performed using the TURBOMOLE V7.8.1 package using the resolution of identity (RI) approximation.<sup>12-19</sup> Initial optimisations were performed at the (RI-)BP86/SV(P) level with an m5 grid, followed by frequency calculations at the same level. All minima were confirmed as such by the absence of imaginary frequencies, transitions states had a single imaginary frequency. Single-point energies were then performed on the (RI-)BP86/SV(P) optimised geometries using the hybrid PBE0 functional and the flexible def2-TZVPP basis set. Energies, xyz coordinates and the first 50 lines of the vibrational spectra are presented. Solvation effects were modelled using COMSO<sup>20</sup> using the dielectronic constant of 2.27 for benzene, 2.02 for cyclohexane and 8.73 for CH<sub>2</sub>Cl<sub>2</sub>. Wnergies were corrected for dispersion using Grimme's D3-method<sup>21</sup> with Becke-Johnson dampening.<sup>22</sup>

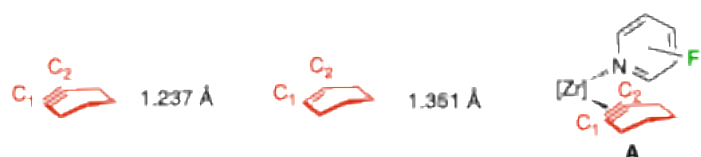

| Py ligand   | Zr...N / Å | Zr...C <sub>1</sub> / Å | Zr...C <sub>2</sub> / Å | C <sub>1</sub> ...C <sub>2</sub> / Å |
|-------------|------------|-------------------------|-------------------------|--------------------------------------|
| <b>None</b> | N/A        | 2.163                   | 2.163                   | 1.356                                |
| <b>H</b>    | 2.483      | 2.190                   | 2.235                   | 1.377                                |
| <b>F1-1</b> | 2.529      | 2.192                   | 2.228                   | 1.334                                |
| <b>F1-2</b> | 2.541      | 2.186                   | 2.243                   | 1.338                                |
| <b>F2</b>   | 2.657      | 2.184                   | 2.225                   | 1.336                                |
| <b>F3</b>   | 2.667      | 2.182                   | 2.224                   | 1.337                                |
| <b>F4</b>   | 2.683      | 2.183                   | 2.226                   | 1.336                                |
| <b>F5</b>   | 2.704      | 2.181                   | 2.223                   | 1.337                                |

Table S4. Comparison of the calculated bond metrics in **A**, cyclohexyne and the 16-electron complex [Cp<sub>2</sub>Zr(c-C<sub>2</sub>(CH<sub>2</sub>)<sub>4</sub>)]. [Zr] = Cp<sub>2</sub>Zr.

### 3.2 Collated Energies and xyz coordinates

1

|                                            |                                                               |
|--------------------------------------------|---------------------------------------------------------------|
| SCF Energy (au) BP86/SV(P)                 | -1128.167390448                                               |
| SCF Energy (au) PBE0/def2-TZVPP            | -1127.990376521                                               |
| SCF Energy (au) PBE0/def2-TZVPP            | -1127.9998918961 (CH <sub>2</sub> Cl <sub>2</sub> Correction) |
| SCF Energy (au) PBE0/def2-TZVPP            | -1127.9951772827 (C <sub>6</sub> H <sub>6</sub> Correction)   |
| SCF Energy (au) PBE0/def2-TZVPP            | -1127.9945725827 (C <sub>6</sub> H <sub>12</sub> Correction)  |
| Zero Point Energy (au)                     | 0.3939095                                                     |
| Chemical Potential (kJ mol <sup>-1</sup> ) | 895.22                                                        |
| Dispersion Correction (au) PBE0/def2-TZVPP | -0.06691185                                                   |

xyz coordinates

48

|    |            |            |            |
|----|------------|------------|------------|
| Zr | -0.6594056 | -0.7788597 | 0.1692119  |
| P  | -0.4515437 | 1.6396458  | 1.3827544  |
| C  | 1.0795613  | 0.2229149  | -0.8926745 |
| C  | -1.1903908 | -2.2488964 | 2.2646393  |
| H  | -2.2127604 | -2.2726603 | 2.6649090  |
| C  | 2.1467944  | 1.1649024  | -1.4026093 |
| H  | 2.6625284  | 1.7257289  | -0.5851147 |
| H  | 1.6754134  | 1.9562295  | -2.0393372 |
| C  | -0.6563452 | -3.1130453 | 1.2607690  |
| H  | -1.1920730 | -3.9328837 | 0.7632152  |
| C  | 0.8826929  | -0.9967777 | -1.3898626 |
| C  | 0.7157226  | -2.7673140 | 1.0555692  |
| H  | 1.4118597  | -3.2675796 | 0.3711803  |
| C  | -2.9225029 | 0.4108278  | -0.3826910 |
| H  | -3.2311792 | 1.3384358  | 0.1187425  |
| C  | -0.1538515 | -1.3577768 | 2.6668224  |
| H  | -0.2333886 | -0.6052977 | 3.4634778  |
| C  | 1.6635838  | -1.6443058 | -2.4996357 |
| H  | 0.9995634  | -2.1708229 | -3.2267342 |
| H  | 2.3152480  | -2.4482200 | -2.0745343 |
| C  | -2.7376923 | -1.8199128 | -0.9308742 |
| H  | -2.8506921 | -2.9124796 | -0.9158059 |
| C  | 3.1960557  | 0.3919073  | -2.2427374 |
| H  | 3.8536575  | 1.1054271  | -2.7911853 |
| H  | 3.8581796  | -0.1830240 | -1.5521776 |
| C  | 1.0256147  | -1.6762968 | 1.9191500  |
| H  | 2.0006858  | -1.1782655 | 1.9984790  |
| C  | -3.2638874 | -0.9091959 | 0.0347122  |
| H  | -3.8415746 | -1.1733296 | 0.9305363  |
| C  | -2.1928483 | 0.3180787  | -1.6098789 |
| H  | -1.7901612 | 1.1573098  | -2.1917808 |
| C  | 2.5328419  | -0.5883510 | -3.2307669 |
| H  | 3.3075286  | -1.0883611 | -3.8565154 |
| H  | 1.8864520  | -0.0085326 | -3.9319705 |
| C  | -2.0821459 | -1.0620773 | -1.9514546 |
| H  | -1.6009022 | -1.4686284 | -2.8497349 |
| C  | -1.6345934 | 2.1564370  | 2.7371478  |
| C  | -0.5712064 | 3.1101877  | 0.2561847  |
| C  | 1.1744544  | 1.9582445  | 2.2204848  |
| H  | 1.3140941  | 1.2490761  | 3.0632938  |
| H  | 1.2250652  | 2.9981442  | 2.6132703  |
| H  | 1.9934627  | 1.7963480  | 1.4901474  |
| H  | 0.2042837  | 3.0231544  | -0.5318400 |
| H  | -0.4272227 | 4.0589641  | 0.8196006  |
| H  | -1.5661035 | 3.1318602  | -0.2365713 |
| H  | -1.3902223 | 3.1660789  | 3.1370857  |
| H  | -1.5987241 | 1.4228327  | 3.5711256  |
| H  | -2.6739270 | 2.1701588  | 2.3439779  |

| vibrational spectrum |      |          |             |              | selection rules |       |
|----------------------|------|----------|-------------|--------------|-----------------|-------|
| #                    | mode | symmetry | wave number | IR intensity | IR              | RAMAN |
| #                    |      |          | cm**(-1)    | km/mol       |                 |       |
| 1                    |      |          | -0.00       | 0.00000      | -               | -     |
| 2                    |      |          | -0.00       | 0.00000      | -               | -     |
| 3                    |      |          | -0.00       | 0.00000      | -               | -     |
| 4                    |      |          | 0.00        | 0.00000      | -               | -     |
| 5                    |      |          | 0.00        | 0.00000      | -               | -     |
| 6                    |      |          | 0.00        | 0.00000      | -               | -     |
| 7                    |      | a        | 32.16       | 0.00186      | YES             | YES   |
| 8                    |      | a        | 51.49       | 0.06175      | YES             | YES   |
| 9                    |      | a        | 54.66       | 0.01211      | YES             | YES   |
| 10                   |      | a        | 60.85       | 0.18411      | YES             | YES   |
| 11                   |      | a        | 76.64       | 1.24496      | YES             | YES   |
| 12                   |      | a        | 87.11       | 0.34542      | YES             | YES   |
| 13                   |      | a        | 95.89       | 0.31977      | YES             | YES   |
| 14                   |      | a        | 112.67      | 0.09166      | YES             | YES   |
| 15                   |      | a        | 127.05      | 0.49329      | YES             | YES   |
| 16                   |      | a        | 143.02      | 0.16479      | YES             | YES   |
| 17                   |      | a        | 155.93      | 0.56909      | YES             | YES   |
| 18                   |      | a        | 157.00      | 1.43085      | YES             | YES   |
| 19                   |      | a        | 162.23      | 0.80148      | YES             | YES   |
| 20                   |      | a        | 167.34      | 1.02352      | YES             | YES   |
| 21                   |      | a        | 191.62      | 0.28581      | YES             | YES   |
| 22                   |      | a        | 196.46      | 0.76940      | YES             | YES   |
| 23                   |      | a        | 219.67      | 0.11922      | YES             | YES   |
| 24                   |      | a        | 226.40      | 3.20054      | YES             | YES   |
| 25                   |      | a        | 240.77      | 0.97688      | YES             | YES   |
| 26                   |      | a        | 248.68      | 5.01112      | YES             | YES   |
| 27                   |      | a        | 257.51      | 0.17636      | YES             | YES   |
| 28                   |      | a        | 259.23      | 0.36431      | YES             | YES   |
| 29                   |      | a        | 262.49      | 0.79313      | YES             | YES   |
| 30                   |      | a        | 264.63      | 0.72482      | YES             | YES   |
| 31                   |      | a        | 279.01      | 1.12255      | YES             | YES   |
| 32                   |      | a        | 293.51      | 6.56410      | YES             | YES   |
| 33                   |      | a        | 308.32      | 8.99486      | YES             | YES   |
| 34                   |      | a        | 314.18      | 19.28485     | YES             | YES   |
| 35                   |      | a        | 335.12      | 1.51767      | YES             | YES   |
| 36                   |      | a        | 410.52      | 1.23255      | YES             | YES   |
| 37                   |      | a        | 460.06      | 0.35257      | YES             | YES   |
| 38                   |      | a        | 523.57      | 0.71442      | YES             | YES   |
| 39                   |      | a        | 593.95      | 0.89015      | YES             | YES   |
| 40                   |      | a        | 595.88      | 0.25218      | YES             | YES   |
| 41                   |      | a        | 597.93      | 0.58287      | YES             | YES   |
| 42                   |      | a        | 602.36      | 0.29627      | YES             | YES   |
| 43                   |      | a        | 633.51      | 12.38616     | YES             | YES   |
| 44                   |      | a        | 681.26      | 4.89965      | YES             | YES   |
| 45                   |      | a        | 685.14      | 8.08745      | YES             | YES   |
| 46                   |      | a        | 699.85      | 10.14127     | YES             | YES   |
| 47                   |      | a        | 759.55      | 1.92634      | YES             | YES   |
| 48                   |      | a        | 766.73      | 91.86585     | YES             | YES   |
| 49                   |      | a        | 767.65      | 119.01580    | YES             | YES   |
| 50                   |      | a        | 773.74      | 5.98914      | YES             | YES   |

**PMe<sub>3</sub>**

SCF Energy (au) BP86/SV(P) -460.9233674584  
SCF Energy (au) PBE0/def2-TZVPP -460.8709757608  
SCF Energy (au) PBE0/def2-TZVPP -460.8752962778 (CH<sub>2</sub>Cl<sub>2</sub> Correction)  
SCF Energy (au) PBE0/def2-TZVPP -460.8731205431 (C<sub>6</sub>H<sub>6</sub> Correction)  
SCF Energy (au) PBE0/def2-TZVPP -460.8728469920 (C<sub>6</sub>H<sub>12</sub> Correction)  
Zero Point Energy (au) 0.1088853  
Chemical Potential (kJ mol<sup>-1</sup>) 208.57  
Dispersion Correction (au) PBE0/def2-TZVPP -0.00873543

xyz coordinates

13

|   |            |            |            |
|---|------------|------------|------------|
| P | -0.1295231 | -0.8491666 | -0.3814261 |
| C | -1.2953682 | -0.2934559 | 0.9740931  |
| C | -0.2275767 | 0.6533155  | -1.4943974 |
| C | 1.5030996  | -0.4900856 | 0.4620205  |
| H | 1.6618544  | -1.2191516 | 1.2870966  |
| H | 1.5575815  | 0.5415028  | 0.8807053  |
| H | 2.3333018  | -0.6242114 | -0.2661696 |
| H | 0.5329786  | 0.5661087  | -2.3015266 |
| H | -0.0607135 | 1.6102618  | -0.9476877 |
| H | -1.2274865 | 0.6895742  | -1.9805556 |
| H | -1.0579758 | 0.7248975  | 1.3601597  |
| H | -1.2515194 | -1.0149393 | 1.8196597  |
| H | -2.3386525 | -0.2946501 | 0.5880280  |

vibrational spectrum

| #  | mode | symmetry | wave number           | IR intensity | selection rules |       |
|----|------|----------|-----------------------|--------------|-----------------|-------|
| #  |      |          | cm <sup>**</sup> (-1) | km/mol       | IR              | RAMAN |
| 1  |      |          | -0.00                 | 0.00000      | -               | -     |
| 2  |      |          | 0.00                  | 0.00000      | -               | -     |
| 3  |      |          | 0.00                  | 0.00000      | -               | -     |
| 4  |      |          | 0.00                  | 0.00000      | -               | -     |
| 5  |      |          | 0.00                  | 0.00000      | -               | -     |
| 6  |      |          | 0.00                  | 0.00000      | -               | -     |
| 7  |      | a        | 178.80                | 0.00001      | YES             | YES   |
| 8  |      | a        | 201.72                | 0.05688      | YES             | YES   |
| 9  |      | a        | 201.93                | 0.05649      | YES             | YES   |
| 10 |      | a        | 242.08                | 0.12910      | YES             | YES   |
| 11 |      | a        | 242.28                | 0.13000      | YES             | YES   |
| 12 |      | a        | 284.56                | 0.19815      | YES             | YES   |
| 13 |      | a        | 625.80                | 0.02293      | YES             | YES   |
| 14 |      | a        | 679.37                | 12.43552     | YES             | YES   |
| 15 |      | a        | 679.44                | 12.44542     | YES             | YES   |
| 16 |      | a        | 768.76                | 0.00003      | YES             | YES   |
| 17 |      | a        | 818.43                | 1.29603      | YES             | YES   |
| 18 |      | a        | 818.72                | 1.29925      | YES             | YES   |
| 19 |      | a        | 932.10                | 24.43917     | YES             | YES   |
| 20 |      | a        | 932.22                | 24.42923     | YES             | YES   |
| 21 |      | a        | 950.39                | 31.16371     | YES             | YES   |
| 22 |      | a        | 1261.44               | 3.75348      | YES             | YES   |
| 23 |      | a        | 1261.56               | 3.74639      | YES             | YES   |
| 24 |      | a        | 1287.32               | 4.63875      | YES             | YES   |
| 25 |      | a        | 1397.19               | 0.00020      | YES             | YES   |
| 26 |      | a        | 1403.11               | 7.49281      | YES             | YES   |
| 27 |      | a        | 1403.19               | 7.49826      | YES             | YES   |
| 28 |      | a        | 1413.00               | 10.82005     | YES             | YES   |
| 29 |      | a        | 1413.04               | 10.80722     | YES             | YES   |
| 30 |      | a        | 1421.72               | 13.59568     | YES             | YES   |
| 31 |      | a        | 2927.17               | 28.15530     | YES             | YES   |
| 32 |      | a        | 2929.03               | 18.01089     | YES             | YES   |
| 33 |      | a        | 2929.10               | 18.04425     | YES             | YES   |

|    |   |         |          |     |     |
|----|---|---------|----------|-----|-----|
| 34 | a | 3022.85 | 32.75955 | YES | YES |
| 35 | a | 3023.95 | 1.75715  | YES | YES |
| 36 | a | 3024.05 | 1.66023  | YES | YES |
| 37 | a | 3040.17 | 9.37954  | YES | YES |
| 38 | a | 3040.24 | 8.30494  | YES | YES |
| 39 | a | 3040.39 | 1.43075  | YES | YES |



**Py-H**

SCF Energy (au) BP86/SV(P) -248.1066180477  
 SCF Energy (au) PBE0/def2-TZVPP -248.0746583058  
 SCF Energy (au) PBE0/def2-TZVPP -248.0817490489 (CH<sub>2</sub>Cl<sub>2</sub> Correction)  
 SCF Energy (au) PBE0/def2-TZVPP -248.0781857274 (C<sub>6</sub>H<sub>6</sub> Correction)  
 SCF Energy (au) PBE0/def2-TZVPP -248.0777356766 (C<sub>6</sub>H<sub>12</sub> Correction)  
 Zero Point Energy (au) 0.0861996  
 Chemical Potential (kJ mol<sup>-1</sup>) 155.79  
 Dispersion Correction (au) PBE0/def2-TZVPP -0.00841143

## xyz coordinates

```

11
H      0.0000000    0.0000000    2.3069622
H      2.0810168    0.0000000   -1.5155506
N      0.0000000    0.0000000   -1.6187902
C      0.0000000    0.0000000    1.2038472
C     -1.2067847    0.0000000    0.4857513
H     -2.1800994    0.0000000    1.0037004
C      1.1480564    0.0000000   -0.9199064
C      1.2067847    0.0000000    0.4857513
H      2.1800994    0.0000000    1.0037004
C     -1.1480564    0.0000000   -0.9199064
H     -2.0810168    0.0000000   -1.5155506
  
```

## vibrational spectrum

| #  | mode | symmetry | wave number<br>cm**(-1) | IR intensity<br>km/mol | selection rules<br>IR | RAMAN |
|----|------|----------|-------------------------|------------------------|-----------------------|-------|
| 1  |      |          | -0.00                   | 0.00000                | -                     | -     |
| 2  |      |          | -0.00                   | 0.00000                | -                     | -     |
| 3  |      |          | -0.00                   | 0.00000                | -                     | -     |
| 4  |      |          | 0.00                    | 0.00000                | -                     | -     |
| 5  |      |          | 0.00                    | 0.00000                | -                     | -     |
| 6  |      |          | 0.00                    | 0.00000                | -                     | -     |
| 7  |      | a2       | 361.88                  | 0.00000                | NO                    | YES   |
| 8  |      | b2       | 407.45                  | 2.95433                | YES                   | YES   |
| 9  |      | a1       | 590.52                  | 4.10983                | YES                   | YES   |
| 10 |      | b1       | 649.73                  | 0.36894                | YES                   | YES   |
| 11 |      | b2       | 695.46                  | 51.02019               | YES                   | YES   |
| 12 |      | b2       | 743.76                  | 4.40544                | YES                   | YES   |
| 13 |      | a2       | 870.30                  | 0.00000                | NO                    | YES   |
| 14 |      | b2       | 923.19                  | 0.01559                | YES                   | YES   |
| 15 |      | a2       | 964.45                  | 0.00000                | NO                    | YES   |
| 16 |      | a1       | 981.06                  | 8.96027                | YES                   | YES   |
| 17 |      | b2       | 984.79                  | 0.00078                | YES                   | YES   |
| 18 |      | a1       | 1021.17                 | 3.12093                | YES                   | YES   |
| 19 |      | b1       | 1049.26                 | 0.00011                | YES                   | YES   |
| 20 |      | a1       | 1062.16                 | 4.76690                | YES                   | YES   |
| 21 |      | b1       | 1129.74                 | 1.35033                | YES                   | YES   |
| 22 |      | a1       | 1206.08                 | 3.22796                | YES                   | YES   |
| 23 |      | b1       | 1324.56                 | 0.83578                | YES                   | YES   |
| 24 |      | b1       | 1338.32                 | 0.09058                | YES                   | YES   |
| 25 |      | b1       | 1436.45                 | 23.90803               | YES                   | YES   |
| 26 |      | a1       | 1471.11                 | 2.85488                | YES                   | YES   |
| 27 |      | a1       | 1592.10                 | 20.15549               | YES                   | YES   |
| 28 |      | b1       | 1593.46                 | 10.48642               | YES                   | YES   |
| 29 |      | b1       | 3059.88                 | 37.24818               | YES                   | YES   |
| 30 |      | a1       | 3063.13                 | 9.44161                | YES                   | YES   |
| 31 |      | a1       | 3093.75                 | 3.78886                | YES                   | YES   |
| 32 |      | b1       | 3107.83                 | 24.98731               | YES                   | YES   |
| 33 |      | a1       | 3115.63                 | 7.55444                | YES                   | YES   |

**Py-F<sub>1</sub>**

SCF Energy (au) BP86/SV(P) -347.2852714218  
 SCF Energy (au) PBE0/def2-TZVPP -347.2766268916  
 SCF Energy (au) PBE0/def2-TZVPP -347.2837403032 (CH<sub>2</sub>Cl<sub>2</sub>  
 Correction)  
 SCF Energy (au) PBE0/def2-TZVPP -347.2801537587 (C<sub>6</sub>H<sub>6</sub> Correction)  
 SCF Energy (au) PBE0/def2-TZVPP -347.2797027048 (C<sub>6</sub>H<sub>12</sub> Correction)  
 Zero Point Energy (au) 0.0785671  
 Chemical Potential (kJ mol<sup>-1</sup>) 130.46  
 Dispersion Correction (au) PBE0/def2-TZVPP -0.00858195

xyz coordinates

11

|   |            |            |           |
|---|------------|------------|-----------|
| H | 1.6015831  | 1.6671717  | 0.0000000 |
| F | -2.7412643 | 0.3847904  | 0.0000000 |
| N | -1.0933177 | -1.1679051 | 0.0000000 |
| C | 0.8446757  | 0.8653438  | 0.0000000 |
| C | 1.2301077  | -0.4884862 | 0.0000000 |
| H | 2.2916668  | -0.7818855 | 0.0000000 |
| C | -1.4252943 | 0.1107581  | 0.0000000 |
| C | -0.5190429 | 1.1872027  | 0.0000000 |
| H | -0.8838022 | 2.2257080  | 0.0000000 |
| C | 0.2199891  | -1.4632811 | 0.0000000 |
| H | 0.4746990  | -2.5394167 | 0.0000000 |

vibrational spectrum

| #  | mode | symmetry | wave number<br>cm** (-1) | IR intensity<br>km/mol | selection rules |       |
|----|------|----------|--------------------------|------------------------|-----------------|-------|
| #  |      |          |                          |                        | IR              | RAMAN |
| 1  |      |          | -0.00                    | 0.00000                | -               | -     |
| 2  |      |          | -0.00                    | 0.00000                | -               | -     |
| 3  |      |          | -0.00                    | 0.00000                | -               | -     |
| 4  |      |          | -0.00                    | 0.00000                | -               | -     |
| 5  |      |          | -0.00                    | 0.00000                | -               | -     |
| 6  |      |          | 0.00                     | 0.00000                | -               | -     |
| 7  |      | a''      | 209.03                   | 0.01200                | YES             | YES   |
| 8  |      | a''      | 413.41                   | 2.90297                | YES             | YES   |
| 9  |      | a'       | 426.27                   | 0.28405                | YES             | YES   |
| 10 |      | a''      | 511.44                   | 2.73962                | YES             | YES   |
| 11 |      | a'       | 545.07                   | 3.62260                | YES             | YES   |
| 12 |      | a'       | 610.18                   | 2.82553                | YES             | YES   |
| 13 |      | a''      | 724.81                   | 4.23074                | YES             | YES   |
| 14 |      | a''      | 768.69                   | 52.18757               | YES             | YES   |
| 15 |      | a'       | 834.64                   | 23.28594               | YES             | YES   |
| 16 |      | a''      | 859.36                   | 0.75921                | YES             | YES   |
| 17 |      | a''      | 942.00                   | 0.32823                | YES             | YES   |
| 18 |      | a''      | 971.77                   | 0.00316                | YES             | YES   |
| 19 |      | a'       | 978.51                   | 8.02664                | YES             | YES   |
| 20 |      | a'       | 1037.20                  | 5.29255                | YES             | YES   |
| 21 |      | a'       | 1082.34                  | 2.34048                | YES             | YES   |
| 22 |      | a'       | 1124.41                  | 3.33035                | YES             | YES   |
| 23 |      | a'       | 1260.74                  | 79.06099               | YES             | YES   |
| 24 |      | a'       | 1290.47                  | 16.66498               | YES             | YES   |
| 25 |      | a'       | 1352.59                  | 1.54731                | YES             | YES   |
| 26 |      | a'       | 1430.02                  | 53.93658               | YES             | YES   |
| 27 |      | a'       | 1472.95                  | 100.34199              | YES             | YES   |
| 28 |      | a'       | 1601.36                  | 47.24652               | YES             | YES   |
| 29 |      | a'       | 1602.36                  | 95.15052               | YES             | YES   |
| 30 |      | a'       | 3075.35                  | 17.53401               | YES             | YES   |
| 31 |      | a'       | 3105.25                  | 5.02985                | YES             | YES   |
| 32 |      | a'       | 3124.49                  | 10.16457               | YES             | YES   |
| 33 |      | a'       | 3132.26                  | 1.46046                | YES             | YES   |

**Py-F<sub>2</sub>**

SCF Energy (au) BP86/SV(P) -446.4628101159  
SCF Energy (au) PBE0/def2-TZVPP -446.4771630783  
SCF Energy (au) PBE0/def2-TZVPP -446.4838649318 (CH<sub>2</sub>Cl<sub>2</sub> Correction)  
SCF Energy (au) PBE0/def2-TZVPP -446.4804778812 (C<sub>6</sub>H<sub>6</sub> Correction)  
SCF Energy (au) PBE0/def2-TZVPP -446.4800533256 (C<sub>6</sub>H<sub>12</sub> Correction)  
Zero Point Energy (au) 0.0708950  
Chemical Potential (kJ mol<sup>-1</sup>) 106.90  
Dispersion Correction (au) PBE0/def2-TZVPP -0.00875519

xyz coordinates

11

|   |            |            |           |
|---|------------|------------|-----------|
| H | 1.5982045  | 1.6769295  | 0.0000000 |
| F | -2.7466546 | 0.3948000  | 0.0000000 |
| N | -1.0912165 | -1.1449385 | 0.0000000 |
| C | 0.8378088  | 0.8790529  | 0.0000000 |
| C | 1.2326367  | -0.4685096 | 0.0000000 |
| H | 2.2873489  | -0.7795440 | 0.0000000 |
| C | -1.4321783 | 0.1348224  | 0.0000000 |
| C | -0.5271592 | 1.2087138  | 0.0000000 |
| H | -0.8884399 | 2.2472946  | 0.0000000 |
| C | 0.2034383  | -1.4240704 | 0.0000000 |
| F | 0.5262114  | -2.7245507 | 0.0000000 |

vibrational spectrum

| #  | mode | symmetry | wave number<br>cm**(-1) | IR intensity<br>km/mol | selection rules<br>IR | RAMAN |
|----|------|----------|-------------------------|------------------------|-----------------------|-------|
| #  |      |          |                         |                        |                       |       |
| 1  |      |          | -0.00                   | 0.00000                | -                     | -     |
| 2  |      |          | -0.00                   | 0.00000                | -                     | -     |
| 3  |      |          | -0.00                   | 0.00000                | -                     | -     |
| 4  |      |          | 0.00                    | 0.00000                | -                     | -     |
| 5  |      |          | 0.00                    | 0.00000                | -                     | -     |
| 6  |      |          | 0.00                    | 0.00000                | -                     | -     |
| 7  |      | a''      | 199.78                  | 0.00000                | YES                   | YES   |
| 8  |      | a''      | 237.96                  | 0.33349                | YES                   | YES   |
| 9  |      | a'       | 345.96                  | 0.91950                | YES                   | YES   |
| 10 |      | a''      | 453.51                  | 0.14163                | YES                   | YES   |
| 11 |      | a'       | 492.42                  | 2.15477                | YES                   | YES   |
| 12 |      | a'       | 529.67                  | 0.26889                | YES                   | YES   |
| 13 |      | a'       | 561.02                  | 3.62844                | YES                   | YES   |
| 14 |      | a''      | 658.93                  | 0.00000                | YES                   | YES   |
| 15 |      | a''      | 707.88                  | 2.80961                | YES                   | YES   |
| 16 |      | a'       | 731.19                  | 11.63430               | YES                   | YES   |
| 17 |      | a''      | 775.70                  | 64.24960               | YES                   | YES   |
| 18 |      | a''      | 853.70                  | 0.00000                | YES                   | YES   |
| 19 |      | a''      | 959.75                  | 0.00110                | YES                   | YES   |
| 20 |      | a'       | 978.99                  | 5.98344                | YES                   | YES   |
| 21 |      | a'       | 999.44                  | 71.47849               | YES                   | YES   |
| 22 |      | a'       | 1056.10                 | 4.72416                | YES                   | YES   |
| 23 |      | a'       | 1122.97                 | 1.92542                | YES                   | YES   |
| 24 |      | a'       | 1227.85                 | 77.20296               | YES                   | YES   |
| 25 |      | a'       | 1314.07                 | 84.45845               | YES                   | YES   |
| 26 |      | a'       | 1373.50                 | 1.67788                | YES                   | YES   |
| 27 |      | a'       | 1453.87                 | 242.62392              | YES                   | YES   |
| 28 |      | a'       | 1457.49                 | 12.11769               | YES                   | YES   |
| 29 |      | a'       | 1611.77                 | 151.42853              | YES                   | YES   |
| 30 |      | a'       | 1612.12                 | 166.70661              | YES                   | YES   |
| 31 |      | a'       | 3114.91                 | 3.87649                | YES                   | YES   |
| 32 |      | a'       | 3143.04                 | 1.50392                | YES                   | YES   |
| 33 |      | a'       | 3145.68                 | 0.00015                | YES                   | YES   |

**Py-F<sub>3</sub>**

SCF Energy (au) BP86/SV(P) -545.6316602660  
SCF Energy (au) PBE0/def2-TZVPP -545.6690681160  
SCF Energy (au) PBE0/def2-TZVPP -545.6749196402 (CH<sub>2</sub>Cl<sub>2</sub>  
Correction)  
SCF Energy (au) PBE0/def2-TZVPP -545.6720184625 (C<sub>6</sub>H<sub>6</sub> Correction)  
SCF Energy (au) PBE0/def2-TZVPP -545.6716465148 (C<sub>6</sub>H<sub>12</sub> Correction)  
Zero Point Energy (au) 0.0630242  
Chemical Potential (kJ mol<sup>-1</sup>) 82.85  
Dispersion Correction (au) PBE0/def2-TZVPP -0.00893316

xyz coordinates

11

|   |            |            |           |
|---|------------|------------|-----------|
| F | 1.7319821  | 1.8179280  | 0.0000000 |
| F | -2.7581120 | 0.3813530  | 0.0000000 |
| N | -1.1079082 | -1.1629839 | 0.0000000 |
| C | 0.8097940  | 0.8500300  | 0.0000000 |
| C | 1.2209815  | -0.4904347 | 0.0000000 |
| H | 2.2819489  | -0.7750660 | 0.0000000 |
| C | -1.4469321 | 0.1178617  | 0.0000000 |
| C | -0.5489766 | 1.1957866  | 0.0000000 |
| H | -0.8851221 | 2.2415716  | 0.0000000 |
| C | 0.1878784  | -1.4395630 | 0.0000000 |
| F | 0.5144662  | -2.7364835 | 0.0000000 |

vibrational spectrum

| #  | mode | symmetry | wave number<br>cm**(-1) | IR intensity<br>km/mol | selection rules<br>IR | RAMAN |
|----|------|----------|-------------------------|------------------------|-----------------------|-------|
| #  |      |          |                         |                        |                       |       |
| 1  |      |          | -0.00                   | 0.00000                | -                     | -     |
| 2  |      |          | -0.00                   | 0.00000                | -                     | -     |
| 3  |      |          | 0.00                    | 0.00000                | -                     | -     |
| 4  |      |          | 0.00                    | 0.00000                | -                     | -     |
| 5  |      |          | 0.00                    | 0.00000                | -                     | -     |
| 6  |      |          | 0.00                    | 0.00000                | -                     | -     |
| 7  |      | a''      | 203.42                  | 0.45652                | YES                   | YES   |
| 8  |      | a''      | 203.47                  | 1.01142                | YES                   | YES   |
| 9  |      | a''      | 255.66                  | 1.96906                | YES                   | YES   |
| 10 |      | a'       | 331.10                  | 1.55840                | YES                   | YES   |
| 11 |      | a'       | 343.32                  | 0.57144                | YES                   | YES   |
| 12 |      | a'       | 491.86                  | 1.24391                | YES                   | YES   |
| 13 |      | a'       | 509.76                  | 7.48678                | YES                   | YES   |
| 14 |      | a'       | 585.65                  | 0.00955                | YES                   | YES   |
| 15 |      | a'       | 603.44                  | 1.15471                | YES                   | YES   |
| 16 |      | a''      | 623.07                  | 5.21582                | YES                   | YES   |
| 17 |      | a''      | 648.62                  | 0.00000                | YES                   | YES   |
| 18 |      | a''      | 704.96                  | 0.63080                | YES                   | YES   |
| 19 |      | a''      | 807.91                  | 0.00047                | YES                   | YES   |
| 20 |      | a''      | 810.22                  | 63.84357               | YES                   | YES   |
| 21 |      | a'       | 974.70                  | 33.19410               | YES                   | YES   |
| 22 |      | a'       | 992.19                  | 12.91264               | YES                   | YES   |
| 23 |      | a'       | 1043.83                 | 63.44464               | YES                   | YES   |
| 24 |      | a'       | 1131.26                 | 130.53130              | YES                   | YES   |
| 25 |      | a'       | 1150.54                 | 62.28289               | YES                   | YES   |
| 26 |      | a'       | 1374.92                 | 12.34158               | YES                   | YES   |
| 27 |      | a'       | 1405.15                 | 3.35231                | YES                   | YES   |
| 28 |      | a'       | 1438.36                 | 189.63072              | YES                   | YES   |
| 29 |      | a'       | 1471.02                 | 34.86740               | YES                   | YES   |
| 30 |      | a'       | 1619.66                 | 357.35623              | YES                   | YES   |
| 31 |      | a'       | 1620.48                 | 266.49670              | YES                   | YES   |
| 32 |      | a'       | 3159.67                 | 0.88350                | YES                   | YES   |
| 33 |      | a'       | 3160.18                 | 2.72383                | YES                   | YES   |

**Py-F<sub>4</sub>**

SCF Energy (au) BP86/SV(P) -644.7837304238  
SCF Energy (au) PBE0/def2-TZVPP -644.8421339934  
SCF Energy (au) PBE0/def2-TZVPP -644.8476718043 (CH<sub>2</sub>Cl<sub>2</sub> Correction)  
SCF Energy (au) PBE0/def2-TZVPP -644.8449326172 (C<sub>6</sub>H<sub>6</sub> Correction)  
SCF Energy (au) PBE0/def2-TZVPP -644.8445805735 (C<sub>6</sub>H<sub>12</sub> Correction)  
Zero Point Energy (au) 0.0550248  
Chemical Potential (kJ mol<sup>-1</sup>) 58.42  
Dispersion Correction (au) PBE0/def2-TZVPP -0.00914508

xyz coordinates

11

|   |            |            |           |
|---|------------|------------|-----------|
| H | 1.5867480  | 1.6648190  | 0.0000000 |
| F | -2.7724589 | 0.3904667  | 0.0000000 |
| N | -1.0945470 | -1.1483529 | 0.0000000 |
| C | 0.8275832  | 0.8682382  | 0.0000000 |
| C | 1.2044832  | -0.4805405 | 0.0000000 |
| F | 2.4943293  | -0.8359928 | 0.0000000 |
| C | -1.4650272 | 0.1181661  | 0.0000000 |
| C | -0.5377388 | 1.1800528  | 0.0000000 |
| F | -0.9545322 | 2.4514260  | 0.0000000 |
| C | 0.1882664  | -1.4577063 | 0.0000000 |
| F | 0.5228941  | -2.7505762 | 0.0000000 |

vibrational spectrum

| #  | mode | symmetry | wave number<br>cm**(-1) | IR intensity<br>km/mol | selection rules<br>IR | RAMAN |
|----|------|----------|-------------------------|------------------------|-----------------------|-------|
| #  |      |          |                         |                        |                       |       |
| 1  |      |          | -0.00                   | 0.00000                | -                     | -     |
| 2  |      |          | -0.00                   | 0.00000                | -                     | -     |
| 3  |      |          | -0.00                   | 0.00000                | -                     | -     |
| 4  |      |          | -0.00                   | 0.00000                | -                     | -     |
| 5  |      |          | -0.00                   | 0.00000                | -                     | -     |
| 6  |      |          | 0.00                    | 0.00000                | -                     | -     |
| 7  |      | a''      | 109.08                  | 0.00000                | YES                   | YES   |
| 8  |      | a''      | 197.82                  | 1.76578                | YES                   | YES   |
| 9  |      | a'       | 270.27                  | 0.59169                | YES                   | YES   |
| 10 |      | a''      | 284.70                  | 0.72571                | YES                   | YES   |
| 11 |      | a'       | 292.68                  | 0.10008                | YES                   | YES   |
| 12 |      | a'       | 353.48                  | 1.42726                | YES                   | YES   |
| 13 |      | a'       | 438.57                  | 0.04675                | YES                   | YES   |
| 14 |      | a''      | 453.09                  | 0.00001                | YES                   | YES   |
| 15 |      | a''      | 465.17                  | 0.70606                | YES                   | YES   |
| 16 |      | a'       | 492.02                  | 1.90054                | YES                   | YES   |
| 17 |      | a'       | 649.86                  | 1.82903                | YES                   | YES   |
| 18 |      | a''      | 662.99                  | 0.00022                | YES                   | YES   |
| 19 |      | a''      | 666.52                  | 3.06116                | YES                   | YES   |
| 20 |      | a'       | 666.88                  | 10.99359               | YES                   | YES   |
| 21 |      | a'       | 735.08                  | 10.04295               | YES                   | YES   |
| 22 |      | a''      | 854.18                  | 31.08116               | YES                   | YES   |
| 23 |      | a'       | 897.99                  | 99.10693               | YES                   | YES   |
| 24 |      | a'       | 1148.14                 | 49.62065               | YES                   | YES   |
| 25 |      | a'       | 1176.31                 | 17.52809               | YES                   | YES   |
| 26 |      | a'       | 1215.51                 | 175.44777              | YES                   | YES   |
| 27 |      | a'       | 1365.03                 | 89.61741               | YES                   | YES   |
| 28 |      | a'       | 1408.79                 | 0.31596                | YES                   | YES   |
| 29 |      | a'       | 1446.72                 | 45.86739               | YES                   | YES   |
| 30 |      | a'       | 1504.35                 | 639.55033              | YES                   | YES   |
| 31 |      | a'       | 1615.46                 | 21.72106               | YES                   | YES   |
| 32 |      | a'       | 1636.18                 | 2.59031                | YES                   | YES   |
| 33 |      | a'       | 3146.21                 | 2.71978                | YES                   | YES   |

**Py-F<sub>5</sub>**

SCF Energy (au) BP86/SV(P) -743.9396048525  
 SCF Energy (au) PBE0/def2-TZVPP -744.0210814730  
 SCF Energy (au) PBE0/def2-TZVPP -744.0253403874 (CH<sub>2</sub>Cl<sub>2</sub> Correction)  
 SCF Energy (au) PBE0/def2-TZVPP -744.0232713855 (C<sub>6</sub>H<sub>6</sub> Correction)  
 SCF Energy (au) PBE0/def2-TZVPP -744.0229997997 (C<sub>6</sub>H<sub>12</sub> Correction)  
 Zero Point Energy (au) 0.0472154  
 Chemical Potential (kJ mol<sup>-1</sup>) 34.50  
 Dispersion Correction (au) PBE0/def2-TZVPP -0.00935967

xyz coordinates

11

|   |            |            |           |
|---|------------|------------|-----------|
| F | 1.7223749  | 1.8074406  | 0.0000000 |
| F | -2.7853753 | 0.3751348  | 0.0000000 |
| N | -1.1099855 | -1.1645672 | 0.0000000 |
| C | 0.8057538  | 0.8453169  | 0.0000000 |
| C | 1.1971547  | -0.5074652 | 0.0000000 |
| F | 2.4893803  | -0.8394770 | 0.0000000 |
| C | -1.4793167 | 0.1027306  | 0.0000000 |
| C | -0.5643298 | 1.1713734  | 0.0000000 |
| F | -0.9575199 | 2.4463361  | 0.0000000 |
| C | 0.1735399  | -1.4726670 | 0.0000000 |
| F | 0.5083235  | -2.7641560 | 0.0000000 |

vibrational spectrum

| #  | mode | symmetry | wave number<br>cm** (-1) | IR intensity<br>km/mol | selection rules |       |
|----|------|----------|--------------------------|------------------------|-----------------|-------|
| #  |      |          |                          |                        | IR              | RAMAN |
| 1  |      |          | -0.00                    | 0.00000                | -               | -     |
| 2  |      |          | 0.00                     | 0.00000                | -               | -     |
| 3  |      |          | 0.00                     | 0.00000                | -               | -     |
| 4  |      |          | 0.00                     | 0.00000                | -               | -     |
| 5  |      |          | 0.00                     | 0.00000                | -               | -     |
| 6  |      |          | 0.00                     | 0.00000                | -               | -     |
| 7  |      | a''      | 111.15                   | 0.00000                | YES             | YES   |
| 8  |      | a''      | 146.75                   | 0.01523                | YES             | YES   |
| 9  |      | a''      | 207.10                   | 2.27357                | YES             | YES   |
| 10 |      | a'       | 257.88                   | 0.04018                | YES             | YES   |
| 11 |      | a'       | 259.88                   | 0.66512                | YES             | YES   |
| 12 |      | a'       | 309.52                   | 0.46268                | YES             | YES   |
| 13 |      | a'       | 337.46                   | 0.73626                | YES             | YES   |
| 14 |      | a''      | 339.35                   | 2.36019                | YES             | YES   |
| 15 |      | a''      | 425.40                   | 0.00000                | YES             | YES   |
| 16 |      | a'       | 443.22                   | 0.03265                | YES             | YES   |
| 17 |      | a'       | 459.54                   | 0.39352                | YES             | YES   |
| 18 |      | a''      | 577.85                   | 0.48023                | YES             | YES   |
| 19 |      | a'       | 579.24                   | 0.00034                | YES             | YES   |
| 20 |      | a''      | 637.19                   | 3.63495                | YES             | YES   |
| 21 |      | a''      | 641.71                   | 0.00002                | YES             | YES   |
| 22 |      | a'       | 675.39                   | 3.36504                | YES             | YES   |
| 23 |      | a'       | 726.07                   | 0.05131                | YES             | YES   |
| 24 |      | a'       | 977.62                   | 175.73986              | YES             | YES   |
| 25 |      | a'       | 1076.28                  | 210.10705              | YES             | YES   |
| 26 |      | a'       | 1172.34                  | 0.05155                | YES             | YES   |
| 27 |      | a'       | 1286.19                  | 24.38580               | YES             | YES   |
| 28 |      | a'       | 1372.19                  | 23.29711               | YES             | YES   |
| 29 |      | a'       | 1431.36                  | 21.52063               | YES             | YES   |
| 30 |      | a'       | 1496.13                  | 631.66017              | YES             | YES   |
| 31 |      | a'       | 1522.53                  | 139.08657              | YES             | YES   |
| 32 |      | a'       | 1618.04                  | 106.93652              | YES             | YES   |
| 33 |      | a'       | 1637.79                  | 4.53080                | YES             | YES   |

**A-H**

|                                                |                 |                                             |
|------------------------------------------------|-----------------|---------------------------------------------|
| SCF Energy (au) BP86/SV(P)                     | -915.3442775939 |                                             |
| SCF Energy (au) PBE0/def2-TZVPP                | -915.1832815574 |                                             |
| SCF Energy (au) PBE0/def2-TZVPP<br>Correction) | -915.1956850082 | (CH <sub>2</sub> Cl <sub>2</sub> )          |
| SCF Energy (au) PBE0/def2-TZVPP                | -915.1895365135 | (C <sub>6</sub> H <sub>6</sub> Correction)  |
| SCF Energy (au) PBE0/def2-TZVPP                | -915.1887477033 | (C <sub>6</sub> H <sub>12</sub> Correction) |
| Zero Point Energy (au)                         | 0.3708127       |                                             |
| Chemical Potential (kJ mol <sup>-1</sup> )     | 835.05          |                                             |
| Dispersion Correction (au) PBE0/def2-TZVPP     | -0.06217159     |                                             |

xyz coordinates

46

|    |            |            |            |
|----|------------|------------|------------|
| Zr | -0.5365648 | -0.6991669 | 0.2113524  |
| H  | -0.5063896 | 4.9180766  | 3.2862371  |
| H  | -1.4237340 | 0.6707292  | 3.0980209  |
| N  | -0.4309775 | 1.4557629  | 1.4395755  |
| C  | -0.4877173 | 3.9460558  | 2.7661457  |
| C  | 0.0820644  | 3.8213188  | 1.4910682  |
| H  | 0.5240447  | 4.6871220  | 0.9733743  |
| C  | -0.9894870 | 1.5863648  | 2.6655938  |
| C  | -1.0353216 | 2.7991564  | 3.3649279  |
| H  | -1.4988614 | 2.8375072  | 4.3633079  |
| C  | 1.0474155  | 0.2155466  | -1.0731919 |
| C  | -0.5931482 | -1.9192015 | 2.5191726  |
| H  | -1.4071767 | -1.7257785 | 3.2321848  |
| C  | 2.1353511  | 1.0794787  | -1.6767551 |
| H  | 2.7673866  | 1.5684839  | -0.8954279 |
| H  | 1.6736662  | 1.9253258  | -2.2480333 |
| C  | 0.0951944  | 2.5628501  | 0.8685605  |
| C  | -0.5965016 | -2.9201307 | 1.5010967  |
| H  | -1.4148910 | -3.6215807 | 1.2915357  |
| C  | 0.7251098  | -0.9895838 | -1.5550877 |
| C  | 0.6699332  | -2.8867992 | 0.8365356  |
| H  | 0.9915586  | -3.5491566 | 0.0226656  |
| C  | -2.9296476 | 0.4028453  | 0.0859773  |
| H  | -3.1705214 | 1.2732733  | 0.7118743  |
| C  | 0.6850554  | -1.2759079 | 2.4872216  |
| H  | 1.0208687  | -0.4642407 | 3.1477385  |
| C  | 1.3443392  | -1.6716776 | -2.7425605 |
| H  | 0.5757425  | -2.1441816 | -3.4009562 |
| H  | 1.9826112  | -2.5216444 | -2.3925376 |
| C  | -2.7224785 | -1.7619973 | -0.6717649 |
| H  | -2.7843924 | -2.8570136 | -0.7386100 |
| C  | 3.0327508  | 0.2490972  | -2.6306281 |
| H  | 3.6817370  | 0.9224029  | -3.2372699 |
| H  | 3.7191703  | -0.3840185 | -2.0191205 |
| C  | 1.4617904  | -1.8733839 | 1.4588547  |
| H  | 2.4793185  | -1.5817784 | 1.1685378  |
| C  | -3.1603933 | -0.9574224 | 0.4271764  |
| H  | -3.5915241 | -1.3263651 | 1.3681558  |
| C  | -2.3563721 | 0.4484314  | -1.2256770 |
| H  | -2.0749629 | 1.3536177  | -1.7799164 |
| C  | 2.2014632  | -0.6646803 | -3.5529990 |
| H  | 2.8681458  | -1.2053784 | -4.2637371 |
| H  | 1.5253226  | -0.0302719 | -4.1744196 |
| C  | -2.2460038 | -0.8926840 | -1.7000510 |
| H  | -1.8750223 | -1.2022191 | -2.6847939 |
| H  | 0.5420494  | 2.4028163  | -0.1233538 |

| vibrational spectrum |      |          |             |              |                 |       |
|----------------------|------|----------|-------------|--------------|-----------------|-------|
| #                    | mode | symmetry | wave number | IR intensity | selection rules |       |
| #                    |      |          | cm**(-1)    | km/mol       | IR              | RAMAN |
| 1                    |      |          | -0.00       | 0.00000      | -               | -     |
| 2                    |      |          | -0.00       | 0.00000      | -               | -     |
| 3                    |      |          | -0.00       | 0.00000      | -               | -     |
| 4                    |      |          | -0.00       | 0.00000      | -               | -     |
| 5                    |      |          | 0.00        | 0.00000      | -               | -     |
| 6                    |      |          | 0.00        | 0.00000      | -               | -     |
| 7                    |      | a        | 22.02       | 0.24720      | YES             | YES   |
| 8                    |      | a        | 32.86       | 0.01924      | YES             | YES   |
| 9                    |      | a        | 47.09       | 0.65091      | YES             | YES   |
| 10                   |      | a        | 51.29       | 0.13635      | YES             | YES   |
| 11                   |      | a        | 54.57       | 0.11406      | YES             | YES   |
| 12                   |      | a        | 66.23       | 0.27628      | YES             | YES   |
| 13                   |      | a        | 83.91       | 0.31956      | YES             | YES   |
| 14                   |      | a        | 111.84      | 0.02422      | YES             | YES   |
| 15                   |      | a        | 121.23      | 0.09183      | YES             | YES   |
| 16                   |      | a        | 140.72      | 0.28355      | YES             | YES   |
| 17                   |      | a        | 149.61      | 0.13619      | YES             | YES   |
| 18                   |      | a        | 152.94      | 0.14725      | YES             | YES   |
| 19                   |      | a        | 172.03      | 1.19126      | YES             | YES   |
| 20                   |      | a        | 211.12      | 0.49822      | YES             | YES   |
| 21                   |      | a        | 223.78      | 3.36626      | YES             | YES   |
| 22                   |      | a        | 233.53      | 1.45235      | YES             | YES   |
| 23                   |      | a        | 246.27      | 1.64651      | YES             | YES   |
| 24                   |      | a        | 249.74      | 2.61368      | YES             | YES   |
| 25                   |      | a        | 261.33      | 0.39858      | YES             | YES   |
| 26                   |      | a        | 276.40      | 4.29925      | YES             | YES   |
| 27                   |      | a        | 303.47      | 10.23890     | YES             | YES   |
| 28                   |      | a        | 310.51      | 7.27414      | YES             | YES   |
| 29                   |      | a        | 313.37      | 29.66264     | YES             | YES   |
| 30                   |      | a        | 385.19      | 0.42447      | YES             | YES   |
| 31                   |      | a        | 413.18      | 1.64874      | YES             | YES   |
| 32                   |      | a        | 431.29      | 1.21459      | YES             | YES   |
| 33                   |      | a        | 459.69      | 0.35157      | YES             | YES   |
| 34                   |      | a        | 523.40      | 1.68760      | YES             | YES   |
| 35                   |      | a        | 592.37      | 1.34817      | YES             | YES   |
| 36                   |      | a        | 595.15      | 0.29408      | YES             | YES   |
| 37                   |      | a        | 597.38      | 1.02632      | YES             | YES   |
| 38                   |      | a        | 599.02      | 0.44484      | YES             | YES   |
| 39                   |      | a        | 612.58      | 2.02464      | YES             | YES   |
| 40                   |      | a        | 646.10      | 0.09296      | YES             | YES   |
| 41                   |      | a        | 684.19      | 3.00397      | YES             | YES   |
| 42                   |      | a        | 693.43      | 39.69276     | YES             | YES   |
| 43                   |      | a        | 750.25      | 13.66286     | YES             | YES   |
| 44                   |      | a        | 755.43      | 28.86291     | YES             | YES   |
| 45                   |      | a        | 766.18      | 30.19758     | YES             | YES   |
| 46                   |      | a        | 772.91      | 158.67998    | YES             | YES   |
| 47                   |      | a        | 777.60      | 60.57122     | YES             | YES   |
| 48                   |      | a        | 784.90      | 2.20608      | YES             | YES   |
| 49                   |      | a        | 791.42      | 4.07810      | YES             | YES   |
| 50                   |      | a        | 804.16      | 2.96053      | YES             | YES   |



**A-F<sub>1</sub>-1**

|                                                |                  |                                            |
|------------------------------------------------|------------------|--------------------------------------------|
| SCF Energy (au) BP86/SV(P)                     | -1014.512856011  |                                            |
| SCF Energy (au) PBE0/def2-TZVPP                | -1014.372698377  |                                            |
| SCF Energy (au) PBE0/def2-TZVPP<br>Correction) | -1014.3858720393 | (CH <sub>2</sub> Cl <sub>2</sub> )         |
| SCF Energy (au) PBE0/def2-TZVPP                | -1014.3793277811 | (C <sub>6</sub> H <sub>6</sub> Correction) |
| SCF Energy (au) PBE0/def2-TZVPP<br>Correction) | -1014.3784901118 | (C <sub>6</sub> H <sub>12</sub> )          |
| Zero Point Energy (au)                         | 0.3628730        |                                            |
| Chemical Potential (kJ mol <sup>-1</sup> )     | 812.05           |                                            |
| Dispersion Correction (au) PBE0/def2-TZVPP     | -0.06218706      |                                            |

xyz coordinates

46

|    |            |            |            |
|----|------------|------------|------------|
| Zr | -0.6056638 | -0.7243008 | 0.1883750  |
| H  | -0.1920965 | 4.9590281  | 3.2392393  |
| H  | -0.7048271 | 0.6440439  | 3.2679190  |
| N  | -0.5671901 | 1.5089204  | 1.3755270  |
| C  | -0.3029665 | 3.9922892  | 2.7222091  |
| C  | -0.3221328 | 3.9327532  | 1.3243795  |
| H  | -0.2343234 | 4.8253003  | 0.6874170  |
| C  | -0.5768567 | 1.5946289  | 2.7336837  |
| C  | -0.4432537 | 2.7926408  | 3.4417060  |
| H  | -0.4548387 | 2.7783181  | 4.5421963  |
| C  | 1.0755986  | 0.2054712  | -0.9404644 |
| C  | -0.5621113 | -1.8086714 | 2.5486151  |
| H  | -1.2616926 | -1.4711648 | 3.3270044  |
| C  | 2.1923902  | 1.1009472  | -1.4182745 |
| H  | 2.7913951  | 1.5149002  | -0.5712408 |
| H  | 1.7592068  | 1.9940569  | -1.9321006 |
| C  | -0.4691055 | 2.6747045  | 0.7206049  |
| C  | -0.8086202 | -2.8607705 | 1.6215176  |
| H  | -1.7331318 | -3.4474983 | 1.5474103  |
| C  | 0.7469411  | -0.9496189 | -1.5211575 |
| C  | 0.3686953  | -3.0431310 | 0.8277916  |
| H  | 0.5030015  | -3.7830496 | 0.0273385  |
| C  | -3.0002084 | 0.3321406  | -0.1096081 |
| H  | -3.2705885 | 1.2423635  | 0.4438904  |
| C  | 0.7881889  | -1.3583707 | 2.3420642  |
| H  | 1.3104224  | -0.5684416 | 2.9000483  |
| C  | 1.4154053  | -1.5592716 | -2.7215733 |
| H  | 0.6781183  | -1.9786575 | -3.4480687 |
| H  | 2.0316423  | -2.4357317 | -2.3985767 |
| C  | -2.7534876 | -1.8826378 | -0.6916411 |
| H  | -2.8050680 | -2.9800560 | -0.6777971 |
| C  | 3.1182645  | 0.3310573  | -2.3968015 |
| H  | 3.7953685  | 1.0392169  | -2.9285642 |
| H  | 3.7771706  | -0.3531469 | -1.8102064 |
| C  | 1.3589091  | -2.1327843 | 1.3023436  |
| H  | 2.3664475  | -2.0041841 | 0.8871741  |
| C  | -3.2326597 | -1.0020495 | 0.3277553  |
| H  | -3.6939177 | -1.2994880 | 1.2798849  |
| C  | -2.3837409 | 0.2825515  | -1.3992832 |
| H  | -2.0863840 | 1.1424964  | -2.0111399 |
| C  | 2.3163143  | -0.5039902 | -3.4164286 |
| H  | 3.0070371  | -0.9988777 | -4.1376381 |
| H  | 1.6717423  | 0.1821523  | -4.0158221 |
| C  | -2.2393018 | -1.0901684 | -1.7624871 |
| H  | -1.8340855 | -1.4688869 | -2.7090064 |
| F  | -0.5340068 | 2.6349666  | -0.6082149 |

| vibrational spectrum |      |          |             |              | selection rules |       |
|----------------------|------|----------|-------------|--------------|-----------------|-------|
| #                    | mode | symmetry | wave number | IR intensity | IR              | RAMAN |
| #                    |      |          | cm**(-1)    | km/mol       |                 |       |
| 1                    |      |          | -0.00       | 0.00000      | -               | -     |
| 2                    |      |          | -0.00       | 0.00000      | -               | -     |
| 3                    |      |          | -0.00       | 0.00000      | -               | -     |
| 4                    |      |          | -0.00       | 0.00000      | -               | -     |
| 5                    |      |          | -0.00       | 0.00000      | -               | -     |
| 6                    |      |          | 0.00        | 0.00000      | -               | -     |
| 7                    |      | a        | 17.49       | 0.74190      | YES             | YES   |
| 8                    |      | a        | 38.76       | 0.67560      | YES             | YES   |
| 9                    |      | a        | 47.59       | 0.00399      | YES             | YES   |
| 10                   |      | a        | 51.57       | 0.35381      | YES             | YES   |
| 11                   |      | a        | 54.47       | 0.18405      | YES             | YES   |
| 12                   |      | a        | 78.93       | 0.08605      | YES             | YES   |
| 13                   |      | a        | 86.84       | 0.13076      | YES             | YES   |
| 14                   |      | a        | 117.53      | 0.50819      | YES             | YES   |
| 15                   |      | a        | 118.52      | 0.03980      | YES             | YES   |
| 16                   |      | a        | 126.30      | 0.27557      | YES             | YES   |
| 17                   |      | a        | 133.00      | 0.07014      | YES             | YES   |
| 18                   |      | a        | 140.68      | 0.71130      | YES             | YES   |
| 19                   |      | a        | 142.50      | 0.23537      | YES             | YES   |
| 20                   |      | a        | 208.30      | 0.94659      | YES             | YES   |
| 21                   |      | a        | 219.70      | 4.45778      | YES             | YES   |
| 22                   |      | a        | 225.05      | 1.79307      | YES             | YES   |
| 23                   |      | a        | 234.18      | 1.46907      | YES             | YES   |
| 24                   |      | a        | 244.84      | 2.60511      | YES             | YES   |
| 25                   |      | a        | 248.72      | 0.71138      | YES             | YES   |
| 26                   |      | a        | 265.62      | 1.31545      | YES             | YES   |
| 27                   |      | a        | 272.45      | 6.63270      | YES             | YES   |
| 28                   |      | a        | 299.02      | 13.03848     | YES             | YES   |
| 29                   |      | a        | 306.15      | 3.34734      | YES             | YES   |
| 30                   |      | a        | 310.99      | 27.62878     | YES             | YES   |
| 31                   |      | a        | 412.81      | 2.56891      | YES             | YES   |
| 32                   |      | a        | 433.89      | 1.42664      | YES             | YES   |
| 33                   |      | a        | 445.70      | 1.07992      | YES             | YES   |
| 34                   |      | a        | 459.34      | 0.13494      | YES             | YES   |
| 35                   |      | a        | 513.70      | 3.11020      | YES             | YES   |
| 36                   |      | a        | 521.79      | 3.02999      | YES             | YES   |
| 37                   |      | a        | 547.52      | 3.93592      | YES             | YES   |
| 38                   |      | a        | 591.62      | 0.58622      | YES             | YES   |
| 39                   |      | a        | 593.96      | 0.31150      | YES             | YES   |
| 40                   |      | a        | 595.32      | 1.48666      | YES             | YES   |
| 41                   |      | a        | 598.56      | 0.58866      | YES             | YES   |
| 42                   |      | a        | 619.45      | 0.69153      | YES             | YES   |
| 43                   |      | a        | 681.97      | 0.44722      | YES             | YES   |
| 44                   |      | a        | 724.02      | 6.33834      | YES             | YES   |
| 45                   |      | a        | 748.68      | 34.09556     | YES             | YES   |
| 46                   |      | a        | 759.40      | 52.85186     | YES             | YES   |
| 47                   |      | a        | 764.36      | 11.62241     | YES             | YES   |
| 48                   |      | a        | 772.72      | 169.61351    | YES             | YES   |
| 49                   |      | a        | 775.91      | 42.28608     | YES             | YES   |
| 50                   |      | a        | 782.85      | 15.09472     | YES             | YES   |

**A-F1-2**

|                                            |                                                               |
|--------------------------------------------|---------------------------------------------------------------|
| SCF Energy (au) BP86/SV(P)                 | -1014.518231267                                               |
| SCF Energy (au) PBE0/def2-TZVPP            | -1014.379553892                                               |
| SCF Energy (au) PBE0/def2-TZVPP            | -1014.3916763756 (CH <sub>2</sub> Cl <sub>2</sub> Correction) |
| SCF Energy (au) PBE0/def2-TZVPP            | -1014.3856753046 (C <sub>6</sub> H <sub>6</sub> Correction)   |
| SCF Energy (au) PBE0/def2-TZVPP            | -1014.3849040953 (C <sub>6</sub> H <sub>12</sub> Correction)  |
| Zero Point Energy (au)                     | 0.3629388                                                     |
| Chemical Potential (kJ mol <sup>-1</sup> ) | 811.68                                                        |
| Dispersion Correction (au) PBE0/def2-TZVPP | -0.06228315                                                   |

xyz coordinates

46

|    |            |            |            |
|----|------------|------------|------------|
| Zr | -0.5407216 | -0.7158136 | 0.2297361  |
| H  | -0.2748499 | 4.9382224  | 3.3557500  |
| F  | -1.8967385 | 0.7327249  | 3.0522707  |
| N  | -0.4275829 | 1.4885207  | 1.4886480  |
| C  | -0.3163410 | 3.9712411  | 2.8282872  |
| C  | 0.4261199  | 3.7520358  | 1.6554123  |
| H  | 1.0689241  | 4.5363724  | 1.2279728  |
| C  | -1.1258104 | 1.7300655  | 2.6019128  |
| C  | -1.1177205 | 2.9335509  | 3.3204526  |
| H  | -1.7293734 | 3.0291168  | 4.2297671  |
| C  | 1.0220508  | 0.2165762  | -1.0815098 |
| C  | -0.6664386 | -2.1259462 | 2.4388153  |
| H  | -1.5764538 | -2.0853405 | 3.0511599  |
| C  | 2.0652306  | 1.0949547  | -1.7445175 |
| H  | 2.7347577  | 1.5954510  | -1.0014853 |
| H  | 1.5589378  | 1.9323296  | -2.2892920 |
| C  | 0.3429967  | 2.5052803  | 1.0234095  |
| C  | -0.4148109 | -3.0254580 | 1.3584638  |
| H  | -1.0887077 | -3.8201712 | 1.0113382  |
| C  | 0.7021670  | -0.9959611 | -1.5469624 |
| C  | 0.8938378  | -2.7574180 | 0.8468740  |
| H  | 1.3954540  | -3.3028443 | 0.0380022  |
| C  | -2.9048140 | 0.4362283  | -0.0049009 |
| H  | -3.1301111 | 1.3681283  | 0.5317148  |
| C  | 0.4840878  | -1.2978041 | 2.5864945  |
| H  | 0.6202983  | -0.5121333 | 3.3424179  |
| C  | 1.2795627  | -1.6730337 | -2.7578442 |
| H  | 0.4912326  | -2.1691169 | -3.3744103 |
| H  | 1.9547542  | -2.5049258 | -2.4343785 |
| C  | -2.7472530 | -1.7946255 | -0.5502135 |
| H  | -2.8413061 | -2.8883294 | -0.5133815 |
| C  | 2.9291209  | 0.2804236  | -2.7416856 |
| H  | 3.5306195  | 0.9662036  | -3.3822398 |
| H  | 3.6597780  | -0.3357863 | -2.1653496 |
| C  | 1.4471884  | -1.6826253 | 1.6063466  |
| H  | 2.4370573  | -1.2315746 | 1.4584074  |
| C  | -3.1585365 | -0.8816661 | 0.4694589  |
| H  | -3.5952416 | -1.1470271 | 1.4412118  |
| C  | -2.3407007 | 0.3457452  | -1.3145114 |
| H  | -2.0363139 | 1.1878605  | -1.9498719 |
| C  | 2.0714859  | -0.6540792 | -3.6168783 |
| H  | 2.7121530  | -1.1845712 | -4.3585185 |
| H  | 1.3508768  | -0.0374045 | -4.2052347 |
| C  | -2.2522539 | -1.0372336 | -1.6571840 |
| H  | -1.8962570 | -1.4455269 | -2.6111248 |
| H  | 0.8996451  | 2.2653846  | 0.1071702  |

| vibrational spectrum |      |          |             |              | selection rules |       |
|----------------------|------|----------|-------------|--------------|-----------------|-------|
| #                    | mode | symmetry | wave number | IR intensity | IR              | RAMAN |
| #                    |      |          | cm**(-1)    | km/mol       |                 |       |
| 1                    |      |          | -0.00       | 0.00000      | -               | -     |
| 2                    |      |          | -0.00       | 0.00000      | -               | -     |
| 3                    |      |          | -0.00       | 0.00000      | -               | -     |
| 4                    |      |          | 0.00        | 0.00000      | -               | -     |
| 5                    |      |          | 0.00        | 0.00000      | -               | -     |
| 6                    |      |          | 0.00        | 0.00000      | -               | -     |
| 7                    |      | a        | 20.22       | 0.34625      | YES             | YES   |
| 8                    |      | a        | 31.12       | 0.27330      | YES             | YES   |
| 9                    |      | a        | 45.98       | 0.11911      | YES             | YES   |
| 10                   |      | a        | 47.87       | 0.54819      | YES             | YES   |
| 11                   |      | a        | 58.84       | 0.11963      | YES             | YES   |
| 12                   |      | a        | 68.67       | 0.55588      | YES             | YES   |
| 13                   |      | a        | 79.67       | 0.82551      | YES             | YES   |
| 14                   |      | a        | 105.90      | 0.14224      | YES             | YES   |
| 15                   |      | a        | 120.55      | 1.05537      | YES             | YES   |
| 16                   |      | a        | 126.38      | 0.05150      | YES             | YES   |
| 17                   |      | a        | 130.18      | 0.11985      | YES             | YES   |
| 18                   |      | a        | 145.93      | 0.24065      | YES             | YES   |
| 19                   |      | a        | 150.07      | 0.47494      | YES             | YES   |
| 20                   |      | a        | 211.99      | 0.21317      | YES             | YES   |
| 21                   |      | a        | 225.17      | 3.47113      | YES             | YES   |
| 22                   |      | a        | 233.86      | 0.14020      | YES             | YES   |
| 23                   |      | a        | 236.62      | 1.55584      | YES             | YES   |
| 24                   |      | a        | 252.71      | 3.26876      | YES             | YES   |
| 25                   |      | a        | 253.72      | 2.13251      | YES             | YES   |
| 26                   |      | a        | 261.39      | 0.90753      | YES             | YES   |
| 27                   |      | a        | 277.31      | 3.14931      | YES             | YES   |
| 28                   |      | a        | 298.03      | 9.05218      | YES             | YES   |
| 29                   |      | a        | 311.40      | 11.21565     | YES             | YES   |
| 30                   |      | a        | 312.91      | 30.16867     | YES             | YES   |
| 31                   |      | a        | 416.84      | 2.44274      | YES             | YES   |
| 32                   |      | a        | 428.85      | 1.57540      | YES             | YES   |
| 33                   |      | a        | 441.69      | 0.23834      | YES             | YES   |
| 34                   |      | a        | 460.27      | 0.36396      | YES             | YES   |
| 35                   |      | a        | 511.59      | 2.70934      | YES             | YES   |
| 36                   |      | a        | 524.33      | 3.28884      | YES             | YES   |
| 37                   |      | a        | 549.19      | 3.78107      | YES             | YES   |
| 38                   |      | a        | 591.42      | 0.84871      | YES             | YES   |
| 39                   |      | a        | 595.67      | 0.99645      | YES             | YES   |
| 40                   |      | a        | 597.74      | 1.12641      | YES             | YES   |
| 41                   |      | a        | 599.84      | 0.08598      | YES             | YES   |
| 42                   |      | a        | 620.85      | 2.51589      | YES             | YES   |
| 43                   |      | a        | 684.89      | 2.30313      | YES             | YES   |
| 44                   |      | a        | 726.76      | 0.66257      | YES             | YES   |
| 45                   |      | a        | 760.22      | 5.14177      | YES             | YES   |
| 46                   |      | a        | 764.91      | 51.92422     | YES             | YES   |
| 47                   |      | a        | 769.43      | 11.49848     | YES             | YES   |
| 48                   |      | a        | 772.02      | 189.32232    | YES             | YES   |
| 49                   |      | a        | 781.58      | 75.17478     | YES             | YES   |
| 50                   |      | a        | 787.69      | 0.05822      | YES             | YES\  |

**A-F<sub>2</sub>**

|                                            |                                                               |
|--------------------------------------------|---------------------------------------------------------------|
| SCF Energy (au) BP86/SV(P)                 | -1113.683456585                                               |
| SCF Energy (au) PBE0/def2-TZVPP            | -1113.565091922                                               |
| SCF Energy (au) PBE0/def2-TZVPP            | -1113.5784284631 (CH <sub>2</sub> Cl <sub>2</sub> Correction) |
| SCF Energy (au) PBE0/def2-TZVPP            | -1113.5718235667 (C <sub>6</sub> H <sub>6</sub> Correction)   |
| SCF Energy (au) PBE0/def2-TZVPP            | -1113.5709749946 (C <sub>6</sub> H <sub>12</sub> Correction)  |
| Zero Point Energy (au)                     | 0.3549183                                                     |
| Chemical Potential (kJ mol <sup>-1</sup> ) | 787.84                                                        |
| Dispersion Correction (au) PBE0/def2-TZVPP | -0.06207781                                                   |

xyz coordinates

46

|    |            |            |            |
|----|------------|------------|------------|
| Zr | -0.6123484 | -0.7538945 | 0.2085453  |
| H  | 0.0477655  | 5.0862051  | 3.1230484  |
| F  | -1.1714034 | 0.7479528  | 3.3899210  |
| N  | -0.6306080 | 1.6360395  | 1.3685073  |
| C  | -0.1528965 | 4.1212631  | 2.6310529  |
| C  | -0.0761695 | 4.0050100  | 1.2364946  |
| H  | 0.1686772  | 4.8510080  | 0.5787486  |
| C  | -0.7558315 | 1.8087070  | 2.6927366  |
| C  | -0.5159933 | 2.9989328  | 3.3887628  |
| H  | -0.6318276 | 3.0247697  | 4.4815922  |
| C  | 1.0642318  | 0.1718323  | -0.9244958 |
| C  | -0.6385698 | -2.0177596 | 2.4758939  |
| H  | -1.4469553 | -1.8128993 | 3.1889512  |
| C  | 2.2186315  | 1.0259828  | -1.3943186 |
| H  | 2.8381687  | 1.3973321  | -0.5418463 |
| H  | 1.8261782  | 1.9464540  | -1.8916404 |
| C  | -0.3446282 | 2.7502276  | 0.6733483  |
| C  | -0.6553172 | -3.0006906 | 1.4457673  |
| H  | -1.4781717 | -3.6954245 | 1.2321966  |
| C  | 0.6875134  | -0.9558760 | -1.5344652 |
| C  | 0.6047990  | -2.9601082 | 0.7642690  |
| H  | 0.9140025  | -3.6098357 | -0.0647806 |
| C  | -3.0737231 | 0.1823308  | 0.1046385  |
| H  | -3.3795269 | 0.9968784  | 0.7761034  |
| C  | 0.6423359  | -1.3755036 | 2.4372272  |
| H  | 0.9898089  | -0.5826133 | 3.1132760  |
| C  | 1.3199797  | -1.5603559 | -2.7559470 |
| H  | 0.5583371  | -1.9233539 | -3.4878249 |
| H  | 1.8950138  | -2.4746338 | -2.4628799 |
| C  | -2.7211496 | -1.9191578 | -0.7683632 |
| H  | -2.7112820 | -3.0105386 | -0.8958609 |
| C  | 3.1080988  | 0.2372062  | -2.3903201 |
| H  | 3.8188144  | 0.9252052  | -2.9044256 |
| H  | 3.7325831  | -0.4923691 | -1.8210268 |
| C  | 1.4096927  | -1.9687008 | 1.4002606  |
| H  | 2.4253677  | -1.6772163 | 1.1040413  |
| C  | -3.2287700 | -1.2053138 | 0.3623439  |
| H  | -3.6434143 | -1.6498896 | 1.2775827  |
| C  | -2.4849807 | 0.3356976  | -1.1950709 |
| H  | -2.2572001 | 1.2828310  | -1.6991763 |
| C  | 2.2668326  | -0.5321235 | -3.4289670 |
| H  | 2.9316203  | -1.0408020 | -4.1647188 |
| H  | 1.6541736  | 0.1988576  | -4.0085492 |
| C  | -2.2843647 | -0.9665637 | -1.7384924 |
| H  | -1.8817968 | -1.1975105 | -2.7324182 |
| F  | -0.3456978 | 2.6524111  | -0.6497215 |

| vibrational spectrum |      |          |             |              |                 |       |
|----------------------|------|----------|-------------|--------------|-----------------|-------|
| #                    | mode | symmetry | wave number | IR intensity | selection rules |       |
| #                    |      |          | cm** (-1)   | km/mol       | IR              | RAMAN |
| 1                    |      |          | -0.00       | 0.00000      | -               | -     |
| 2                    |      |          | -0.00       | 0.00000      | -               | -     |
| 3                    |      |          | 0.00        | 0.00000      | -               | -     |
| 4                    |      |          | 0.00        | 0.00000      | -               | -     |
| 5                    |      |          | 0.00        | 0.00000      | -               | -     |
| 6                    |      |          | 0.00        | 0.00000      | -               | -     |
| 7                    |      | a        | 24.06       | 0.68165      | YES             | YES   |
| 8                    |      | a        | 31.07       | 1.18068      | YES             | YES   |
| 9                    |      | a        | 33.77       | 0.28742      | YES             | YES   |
| 10                   |      | a        | 51.49       | 0.12369      | YES             | YES   |
| 11                   |      | a        | 54.19       | 0.28473      | YES             | YES   |
| 12                   |      | a        | 74.09       | 0.03333      | YES             | YES   |
| 13                   |      | a        | 85.93       | 0.13453      | YES             | YES   |
| 14                   |      | a        | 89.16       | 0.09062      | YES             | YES   |
| 15                   |      | a        | 106.17      | 0.07221      | YES             | YES   |
| 16                   |      | a        | 122.16      | 0.34939      | YES             | YES   |
| 17                   |      | a        | 125.81      | 0.23237      | YES             | YES   |
| 18                   |      | a        | 129.56      | 0.11935      | YES             | YES   |
| 19                   |      | a        | 143.24      | 0.28562      | YES             | YES   |
| 20                   |      | a        | 208.33      | 0.91003      | YES             | YES   |
| 21                   |      | a        | 210.41      | 0.25445      | YES             | YES   |
| 22                   |      | a        | 224.14      | 3.21874      | YES             | YES   |
| 23                   |      | a        | 230.54      | 1.63888      | YES             | YES   |
| 24                   |      | a        | 242.76      | 2.10603      | YES             | YES   |
| 25                   |      | a        | 246.62      | 3.15341      | YES             | YES   |
| 26                   |      | a        | 267.70      | 1.29725      | YES             | YES   |
| 27                   |      | a        | 269.58      | 1.81694      | YES             | YES   |
| 28                   |      | a        | 274.37      | 6.55003      | YES             | YES   |
| 29                   |      | a        | 298.14      | 13.65910     | YES             | YES   |
| 30                   |      | a        | 306.28      | 8.61432      | YES             | YES   |
| 31                   |      | a        | 315.75      | 24.41389     | YES             | YES   |
| 32                   |      | a        | 358.16      | 2.60411      | YES             | YES   |
| 33                   |      | a        | 417.93      | 3.08359      | YES             | YES   |
| 34                   |      | a        | 458.06      | 0.19849      | YES             | YES   |
| 35                   |      | a        | 460.35      | 0.39696      | YES             | YES   |
| 36                   |      | a        | 502.48      | 0.94226      | YES             | YES   |
| 37                   |      | a        | 522.71      | 1.47936      | YES             | YES   |
| 38                   |      | a        | 536.85      | 1.88930      | YES             | YES   |
| 39                   |      | a        | 555.20      | 5.06997      | YES             | YES   |
| 40                   |      | a        | 591.67      | 0.99701      | YES             | YES   |
| 41                   |      | a        | 594.69      | 0.37949      | YES             | YES   |
| 42                   |      | a        | 596.09      | 0.59062      | YES             | YES   |
| 43                   |      | a        | 598.69      | 1.10083      | YES             | YES   |
| 44                   |      | a        | 635.71      | 1.72175      | YES             | YES   |
| 45                   |      | a        | 683.52      | 0.74190      | YES             | YES   |
| 46                   |      | a        | 708.95      | 5.78185      | YES             | YES   |
| 47                   |      | a        | 735.39      | 4.29408      | YES             | YES   |
| 48                   |      | a        | 760.16      | 3.44643      | YES             | YES   |
| 49                   |      | a        | 767.05      | 95.35327     | YES             | YES   |
| 50                   |      | a        | 774.04      | 106.98491    | YES             | YES   |

**A-F<sub>3</sub>**

|                                            |                                                               |
|--------------------------------------------|---------------------------------------------------------------|
| SCF Energy (au) BP86/SV(P)                 | -1212.851541425                                               |
| SCF Energy (au) PBE0/def2-TZVPP            | -1212.756457236                                               |
| SCF Energy (au) PBE0/def2-TZVPP            | -1212.7691116531 (CH <sub>2</sub> Cl <sub>2</sub> Correction) |
| SCF Energy (au) PBE0/def2-TZVPP            | -1212.7628778923 (C <sub>6</sub> H <sub>6</sub> Correction)   |
| SCF Energy (au) PBE0/def2-TZVPP            | -1212.7620722505 (C <sub>6</sub> H <sub>12</sub> Correction)  |
| Zero Point Energy (au)                     | 0.3470141                                                     |
| Chemical Potential (kJ mol <sup>-1</sup> ) | 763.53                                                        |
| Dispersion Correction (au) PBE0/def2-TZVPP | -0.06222332                                                   |

xyz coordinates

46

|    |            |            |            |
|----|------------|------------|------------|
| Zr | -0.6160831 | -0.7579750 | 0.2008699  |
| F  | 0.1404400  | 5.2478906  | 3.2439689  |
| F  | -1.2257845 | 0.7576418  | 3.3771454  |
| N  | -0.6460384 | 1.6411142  | 1.3658501  |
| C  | -0.1249050 | 4.0904003  | 2.6389686  |
| C  | -0.0372725 | 3.9996693  | 1.2449694  |
| H  | 0.2301885  | 4.8598796  | 0.6167779  |
| C  | -0.7797647 | 1.8092879  | 2.6894234  |
| C  | -0.5202960 | 2.9844396  | 3.4012397  |
| H  | -0.6400897 | 3.0331880  | 4.4918349  |
| C  | 1.0529112  | 0.1697668  | -0.9395101 |
| C  | -0.6514006 | -2.0207485 | 2.4693693  |
| H  | -1.4713033 | -1.8288980 | 3.1729762  |
| C  | 2.2025923  | 1.0253688  | -1.4194585 |
| H  | 2.8195062  | 1.4110950  | -0.5714190 |
| H  | 1.8051328  | 1.9372793  | -1.9285562 |
| C  | -0.3310781 | 2.7532526  | 0.6798394  |
| C  | -0.6406626 | -3.0030530 | 1.4380664  |
| H  | -1.4502245 | -3.7101101 | 1.2141094  |
| C  | 0.6845203  | -0.9668816 | -1.5391257 |
| C  | 0.6270899  | -2.9433266 | 0.7725164  |
| H  | 0.9565859  | -3.5887796 | -0.0519329 |
| C  | -3.0821872 | 0.1643464  | 0.1042280  |
| H  | -3.3928219 | 0.9727632  | 0.7808398  |
| C  | 0.6195084  | -1.3591163 | 2.4461864  |
| H  | 0.9478607  | -0.5634359 | 3.1286387  |
| C  | 1.3204741  | -1.5792370 | -2.7546650 |
| H  | 0.5606008  | -1.9530765 | -3.4828706 |
| H  | 1.8997959  | -2.4879178 | -2.4527760 |
| C  | -2.7177430 | -1.9293494 | -0.7824124 |
| H  | -2.7017237 | -3.0198537 | -0.9167632 |
| C  | 3.0980311  | 0.2313605  | -2.4056999 |
| H  | 3.8056025  | 0.9180716  | -2.9257036 |
| H  | 3.7256789  | -0.4887958 | -1.8280015 |
| C  | 1.4084981  | -1.9389563 | 1.4175677  |
| H  | 2.4235398  | -1.6325336 | 1.1345303  |
| C  | -3.2300700 | -1.2254777 | 0.3525050  |
| H  | -3.6425729 | -1.6784090 | 1.2645936  |
| C  | -2.4939549 | 0.3294538  | -1.1946486 |
| H  | -2.2724372 | 1.2812320  | -1.6931354 |
| C  | 2.2623889  | -0.5530505 | -3.4374457 |
| H  | 2.9307579  | -1.0657639 | -4.1670496 |
| H  | 1.6465580  | 0.1684846  | -4.0254157 |
| C  | -2.2871496 | -0.9680786 | -1.7467786 |
| H  | -1.8828501 | -1.1903839 | -2.7419597 |
| F  | -0.3298489 | 2.6672223  | -0.6416869 |

| vibrational spectrum |      |          |             |              |                 |       |
|----------------------|------|----------|-------------|--------------|-----------------|-------|
| #                    | mode | symmetry | wave number | IR intensity | selection rules |       |
| #                    |      |          | cm**(-1)    | km/mol       | IR              | RAMAN |
| 1                    |      |          | 0.00        | 0.00000      | -               | -     |
| 2                    |      |          | 0.00        | 0.00000      | -               | -     |
| 3                    |      |          | 0.00        | 0.00000      | -               | -     |
| 4                    |      |          | 0.00        | 0.00000      | -               | -     |
| 5                    |      |          | 0.00        | 0.00000      | -               | -     |
| 6                    |      |          | 0.00        | 0.00000      | -               | -     |
| 7                    |      | a        | 20.47       | 0.36846      | YES             | YES   |
| 8                    |      | a        | 25.80       | 0.04502      | YES             | YES   |
| 9                    |      | a        | 32.19       | 0.10986      | YES             | YES   |
| 10                   |      | a        | 50.41       | 0.11870      | YES             | YES   |
| 11                   |      | a        | 54.12       | 0.20025      | YES             | YES   |
| 12                   |      | a        | 72.10       | 0.00109      | YES             | YES   |
| 13                   |      | a        | 82.66       | 0.15290      | YES             | YES   |
| 14                   |      | a        | 86.71       | 0.14364      | YES             | YES   |
| 15                   |      | a        | 102.12      | 0.01860      | YES             | YES   |
| 16                   |      | a        | 115.71      | 0.03231      | YES             | YES   |
| 17                   |      | a        | 121.10      | 0.09986      | YES             | YES   |
| 18                   |      | a        | 128.79      | 0.15026      | YES             | YES   |
| 19                   |      | a        | 143.28      | 0.26167      | YES             | YES   |
| 20                   |      | a        | 205.90      | 1.56363      | YES             | YES   |
| 21                   |      | a        | 209.51      | 1.24187      | YES             | YES   |
| 22                   |      | a        | 212.31      | 0.30766      | YES             | YES   |
| 23                   |      | a        | 224.35      | 3.14439      | YES             | YES   |
| 24                   |      | a        | 231.49      | 1.49400      | YES             | YES   |
| 25                   |      | a        | 243.52      | 2.12045      | YES             | YES   |
| 26                   |      | a        | 247.06      | 3.13044      | YES             | YES   |
| 27                   |      | a        | 268.00      | 0.85383      | YES             | YES   |
| 28                   |      | a        | 273.72      | 8.20927      | YES             | YES   |
| 29                   |      | a        | 286.62      | 1.59953      | YES             | YES   |
| 30                   |      | a        | 303.04      | 13.40204     | YES             | YES   |
| 31                   |      | a        | 307.35      | 8.64951      | YES             | YES   |
| 32                   |      | a        | 316.87      | 24.23725     | YES             | YES   |
| 33                   |      | a        | 334.24      | 2.41897      | YES             | YES   |
| 34                   |      | a        | 355.75      | 1.66237      | YES             | YES   |
| 35                   |      | a        | 418.22      | 3.01863      | YES             | YES   |
| 36                   |      | a        | 459.76      | 0.10990      | YES             | YES   |
| 37                   |      | a        | 498.53      | 5.52879      | YES             | YES   |
| 38                   |      | a        | 513.95      | 6.03579      | YES             | YES   |
| 39                   |      | a        | 524.08      | 1.40361      | YES             | YES   |
| 40                   |      | a        | 589.97      | 0.48913      | YES             | YES   |
| 41                   |      | a        | 591.60      | 1.02844      | YES             | YES   |
| 42                   |      | a        | 594.73      | 0.33003      | YES             | YES   |
| 43                   |      | a        | 596.12      | 0.67968      | YES             | YES   |
| 44                   |      | a        | 598.60      | 1.05973      | YES             | YES   |
| 45                   |      | a        | 602.28      | 1.68862      | YES             | YES   |
| 46                   |      | a        | 618.42      | 3.60827      | YES             | YES   |
| 47                   |      | a        | 626.60      | 1.20818      | YES             | YES   |
| 48                   |      | a        | 684.02      | 0.91979      | YES             | YES   |
| 49                   |      | a        | 706.73      | 1.70631      | YES             | YES   |
| 50                   |      | a        | 760.30      | 4.42411      | YES             | YES   |



**A-F<sub>4</sub>**

|                                            |                                                               |
|--------------------------------------------|---------------------------------------------------------------|
| SCF Energy (au) BP86/SV(P)                 | -1312.001449269                                               |
| SCF Energy (au) PBE0/def2-TZVPP            | -1311.927408121                                               |
| SCF Energy (au) PBE0/def2-TZVPP            | -1311.9398959022 (CH <sub>2</sub> Cl <sub>2</sub> Correction) |
| SCF Energy (au) PBE0/def2-TZVPP            | -1311.9337074169 (C <sub>6</sub> H <sub>6</sub> Correction)   |
| SCF Energy (au) PBE0/def2-TZVPP            | -1311.9329128457 (C <sub>6</sub> H <sub>12</sub> Correction)  |
| Zero Point Energy (au)                     | 0.3388750                                                     |
| Chemical Potential (kJ mol <sup>-1</sup> ) | 738.63                                                        |
| Dispersion Correction (au) PBE0/def2-TZVPP | -0.06250936                                                   |

xyz coordinates

46

|    |            |            |            |
|----|------------|------------|------------|
| Zr | -0.6230235 | -0.7724790 | 0.2035335  |
| H  | 0.0780540  | 5.0985715  | 3.0931779  |
| F  | -1.1319746 | 0.7512135  | 3.4153167  |
| N  | -0.6369331 | 1.6455329  | 1.3669879  |
| C  | -0.1262916 | 4.1315044  | 2.6103333  |
| C  | -0.0824069 | 3.9924450  | 1.2196241  |
| F  | 0.2030491  | 5.0312855  | 0.4318360  |
| C  | -0.7330996 | 1.7959915  | 2.6917781  |
| C  | -0.4677933 | 3.0034498  | 3.3622256  |
| F  | -0.5678760 | 3.0611531  | 4.6925619  |
| C  | 1.0506152  | 0.1717287  | -0.9195171 |
| C  | -0.6488594 | -2.0294111 | 2.4694242  |
| H  | -1.4542906 | -1.8230009 | 3.1855583  |
| C  | 2.2038993  | 1.0334631  | -1.3778811 |
| H  | 2.8154374  | 1.4040886  | -0.5193405 |
| H  | 1.8112668  | 1.9540040  | -1.8745755 |
| C  | -0.3632791 | 2.7384120  | 0.6437937  |
| C  | -0.6693371 | -3.0144425 | 1.4412993  |
| H  | -1.4939556 | -3.7079110 | 1.2306303  |
| C  | 0.6856446  | -0.9577400 | -1.5334777 |
| C  | 0.5900724  | -2.9782234 | 0.7577952  |
| H  | 0.8965737  | -3.6307994 | -0.0700460 |
| C  | -3.0801347 | 0.1653167  | 0.1011040  |
| H  | -3.3875355 | 0.9782204  | 0.7740602  |
| C  | 0.6346875  | -1.3916418 | 2.4284757  |
| H  | 0.9865209  | -0.6012878 | 3.1052520  |
| C  | 1.3309278  | -1.5563711 | -2.7509835 |
| H  | 0.5764616  | -1.9230754 | -3.4881694 |
| H  | 1.9094274  | -2.4672091 | -2.4544612 |
| C  | -2.7290441 | -1.9347334 | -0.7762245 |
| H  | -2.7201619 | -3.0258491 | -0.9058955 |
| C  | 3.1048350  | 0.2519924  | -2.3695437 |
| H  | 3.8138633  | 0.9460785  | -2.8773005 |
| H  | 3.7305040  | -0.4743514 | -1.7975555 |
| C  | 1.3988506  | -1.9888100 | 1.3918274  |
| H  | 2.4152684  | -1.7011787 | 1.0943078  |
| C  | -3.2353136 | -1.2230675 | 0.3563938  |
| H  | -3.6506409 | -1.6690528 | 1.2705877  |
| C  | -2.4925782 | 0.3210170  | -1.1988169 |
| H  | -2.2678906 | 1.2688331  | -1.7030010 |
| C  | 2.2755541  | -0.5205559 | -3.4152818 |
| H  | 2.9486041  | -1.0239018 | -4.1469746 |
| H  | 1.6623047  | 0.2072764  | -3.9979815 |
| C  | -2.2921847 | -0.9803429 | -1.7446613 |
| H  | -1.8905943 | -1.2092139 | -2.7394688 |
| F  | -0.3772226 | 2.6530719  | -0.6767268 |

| vibrational spectrum |      |          |             |              |                 |       |
|----------------------|------|----------|-------------|--------------|-----------------|-------|
| #                    | mode | symmetry | wave number | IR intensity | selection rules |       |
| #                    |      |          | cm**(-1)    | km/mol       | IR              | RAMAN |
| 1                    |      |          | -0.00       | 0.00000      | -               | -     |
| 2                    |      |          | 0.00        | 0.00000      | -               | -     |
| 3                    |      |          | 0.00        | 0.00000      | -               | -     |
| 4                    |      |          | 0.00        | 0.00000      | -               | -     |
| 5                    |      |          | 0.00        | 0.00000      | -               | -     |
| 6                    |      |          | 0.00        | 0.00000      | -               | -     |
| 7                    |      | a        | 19.22       | 0.41735      | YES             | YES   |
| 8                    |      | a        | 25.59       | 0.13211      | YES             | YES   |
| 9                    |      | a        | 32.40       | 0.08521      | YES             | YES   |
| 10                   |      | a        | 47.52       | 0.04459      | YES             | YES   |
| 11                   |      | a        | 53.00       | 0.18754      | YES             | YES   |
| 12                   |      | a        | 68.31       | 0.03016      | YES             | YES   |
| 13                   |      | a        | 74.41       | 0.14128      | YES             | YES   |
| 14                   |      | a        | 83.00       | 0.05964      | YES             | YES   |
| 15                   |      | a        | 84.86       | 0.09551      | YES             | YES   |
| 16                   |      | a        | 111.89      | 0.22491      | YES             | YES   |
| 17                   |      | a        | 120.59      | 0.06870      | YES             | YES   |
| 18                   |      | a        | 128.86      | 0.11824      | YES             | YES   |
| 19                   |      | a        | 141.43      | 0.15571      | YES             | YES   |
| 20                   |      | a        | 142.89      | 0.14360      | YES             | YES   |
| 21                   |      | a        | 203.11      | 2.57167      | YES             | YES   |
| 22                   |      | a        | 209.94      | 1.02657      | YES             | YES   |
| 23                   |      | a        | 225.10      | 3.63087      | YES             | YES   |
| 24                   |      | a        | 231.72      | 1.75856      | YES             | YES   |
| 25                   |      | a        | 244.57      | 2.75926      | YES             | YES   |
| 26                   |      | a        | 247.25      | 2.68433      | YES             | YES   |
| 27                   |      | a        | 267.57      | 0.80833      | YES             | YES   |
| 28                   |      | a        | 273.67      | 7.06130      | YES             | YES   |
| 29                   |      | a        | 283.13      | 0.84527      | YES             | YES   |
| 30                   |      | a        | 292.48      | 4.08981      | YES             | YES   |
| 31                   |      | a        | 300.72      | 9.94687      | YES             | YES   |
| 32                   |      | a        | 304.12      | 5.49844      | YES             | YES   |
| 33                   |      | a        | 307.85      | 3.22018      | YES             | YES   |
| 34                   |      | a        | 316.63      | 23.77949     | YES             | YES   |
| 35                   |      | a        | 359.65      | 2.79307      | YES             | YES   |
| 36                   |      | a        | 417.53      | 3.44074      | YES             | YES   |
| 37                   |      | a        | 428.99      | 1.81217      | YES             | YES   |
| 38                   |      | a        | 439.17      | 0.35926      | YES             | YES   |
| 39                   |      | a        | 459.45      | 0.01972      | YES             | YES   |
| 40                   |      | a        | 470.96      | 0.94973      | YES             | YES   |
| 41                   |      | a        | 494.14      | 2.13266      | YES             | YES   |
| 42                   |      | a        | 521.55      | 2.07618      | YES             | YES   |
| 43                   |      | a        | 591.54      | 1.10786      | YES             | YES   |
| 44                   |      | a        | 594.42      | 0.28431      | YES             | YES   |
| 45                   |      | a        | 595.89      | 0.61422      | YES             | YES   |
| 46                   |      | a        | 598.49      | 1.00998      | YES             | YES   |
| 47                   |      | a        | 650.73      | 0.37366      | YES             | YES   |
| 48                   |      | a        | 651.22      | 1.02399      | YES             | YES   |
| 49                   |      | a        | 667.01      | 2.93429      | YES             | YES   |
| 50                   |      | a        | 682.39      | 13.14211     | YES             | YES   |

**A-F<sub>5</sub>**

|                                            |                                                               |
|--------------------------------------------|---------------------------------------------------------------|
| SCF Energy (au) BP86/SV(P)                 | -1411.156590632                                               |
| SCF Energy (au) PBE0/def2-TZVPP            | 1411.105927493                                                |
| SCF Energy (au) PBE0/def2-TZVPP            | -1411.1170452353 (CH <sub>2</sub> Cl <sub>2</sub> Correction) |
| SCF Energy (au) PBE0/def2-TZVPP            | -1411.1115563500 (C <sub>6</sub> H <sub>6</sub> Correction)   |
| SCF Energy (au) PBE0/def2-TZVPP            | -1411.1108487867 (C <sub>6</sub> H <sub>12</sub> Correction)  |
| Zero Point Energy (au)                     | 0.3310477                                                     |
| Chemical Potential (kJ mol <sup>-1</sup> ) | 714.20                                                        |
| Dispersion Correction (au) PBE0/def2-TZVPP | -0.06267046                                                   |

xyz coordinates

46

|    |            |            |            |
|----|------------|------------|------------|
| Zr | -0.6335921 | -0.7841334 | 0.1936231  |
| F  | 0.2152884  | 5.2610388  | 3.1989755  |
| F  | -1.1684330 | 0.7644894  | 3.4147805  |
| N  | -0.6637413 | 1.6520111  | 1.3676862  |
| C  | -0.0705726 | 4.1064925  | 2.6134349  |
| C  | -0.0426317 | 3.9860076  | 1.2126658  |
| F  | 0.2625074  | 5.0315692  | 0.4474633  |
| C  | -0.7460851 | 1.7996911  | 2.6928244  |
| C  | -0.4421526 | 2.9868954  | 3.3783132  |
| F  | -0.5262279 | 3.0632732  | 4.7052128  |
| C  | 1.0309534  | 0.1733510  | -0.9267761 |
| C  | -0.6617348 | -2.0262031 | 2.4680636  |
| H  | -1.4713815 | -1.8209366 | 3.1798231  |
| C  | 2.1757731  | 1.0453523  | -1.3884547 |
| H  | 2.7796486  | 1.4302763  | -0.5306708 |
| H  | 1.7736911  | 1.9571769  | -1.8936895 |
| C  | -0.3670283 | 2.7404440  | 0.6476954  |
| C  | -0.6715000 | -3.0178328 | 1.4460204  |
| H  | -1.4910692 | -3.7174316 | 1.2357980  |
| C  | 0.6845692  | -0.9662163 | -1.5346246 |
| C  | 0.5905546  | -2.9779509 | 0.7676317  |
| H  | 0.9048689  | -3.6339984 | -0.0545184 |
| C  | -3.0933067 | 0.1416277  | 0.0809746  |
| H  | -3.4061571 | 0.9544375  | 0.7514761  |
| C  | 0.6182618  | -1.3809441 | 2.4285187  |
| H  | 0.9635599  | -0.5854413 | 3.1028447  |
| C  | 1.3421919  | -1.5647253 | -2.7452488 |
| H  | 0.5950330  | -1.9465193 | -3.4821584 |
| H  | 1.9310899  | -2.4659512 | -2.4399995 |
| C  | -2.7289889 | -1.9585411 | -0.7906700 |
| H  | -2.7145954 | -3.0499090 | -0.9179479 |
| C  | 3.0908599  | 0.2686728  | -2.3706415 |
| H  | 3.7929164  | 0.9684001  | -2.8802214 |
| H  | 3.7235206  | -0.4453751 | -1.7909567 |
| C  | 1.3906290  | -1.9796729 | 1.3989161  |
| H  | 2.4066869  | -1.6879612 | 1.1041720  |
| C  | -3.2436172 | -1.2468173 | 0.3381792  |
| H  | -3.6607078 | -1.6929285 | 1.2515156  |
| C  | -2.5008228 | 0.2974416  | -1.2167177 |
| H  | -2.2785041 | 1.2451874  | -1.7222163 |
| C  | 2.2758870  | -0.5219772 | -3.4139429 |
| H  | 2.9582383  | -1.0220341 | -4.1391713 |
| H  | 1.6556631  | 0.1934403  | -4.0045616 |
| C  | -2.2927376 | -1.0041865 | -1.7594007 |
| H  | -1.8859896 | -1.2331675 | -2.7520776 |
| F  | -0.4008152 | 2.6635787  | -0.6719425 |

| vibrational spectrum |      |          |             |              | selection rules |       |
|----------------------|------|----------|-------------|--------------|-----------------|-------|
| #                    | mode | symmetry | wave number | IR intensity | IR              | RAMAN |
| #                    |      |          | cm**(-1)    | km/mol       |                 |       |
| 1                    |      |          | -0.00       | 0.00000      | -               | -     |
| 2                    |      |          | 0.00        | 0.00000      | -               | -     |
| 3                    |      |          | 0.00        | 0.00000      | -               | -     |
| 4                    |      |          | 0.00        | 0.00000      | -               | -     |
| 5                    |      |          | 0.00        | 0.00000      | -               | -     |
| 6                    |      |          | 0.00        | 0.00000      | -               | -     |
| 7                    |      | a        | 16.81       | 0.21350      | YES             | YES   |
| 8                    |      | a        | 22.58       | 0.01345      | YES             | YES   |
| 9                    |      | a        | 32.11       | 0.05669      | YES             | YES   |
| 10                   |      | a        | 46.25       | 0.05386      | YES             | YES   |
| 11                   |      | a        | 52.49       | 0.13154      | YES             | YES   |
| 12                   |      | a        | 67.47       | 0.07377      | YES             | YES   |
| 13                   |      | a        | 70.60       | 0.08831      | YES             | YES   |
| 14                   |      | a        | 80.75       | 0.09114      | YES             | YES   |
| 15                   |      | a        | 83.28       | 0.12017      | YES             | YES   |
| 16                   |      | a        | 110.47      | 0.05704      | YES             | YES   |
| 17                   |      | a        | 111.58      | 0.13781      | YES             | YES   |
| 18                   |      | a        | 128.16      | 0.16959      | YES             | YES   |
| 19                   |      | a        | 141.66      | 0.20697      | YES             | YES   |
| 20                   |      | a        | 142.55      | 0.09674      | YES             | YES   |
| 21                   |      | a        | 151.33      | 0.02098      | YES             | YES   |
| 22                   |      | a        | 209.39      | 0.97939      | YES             | YES   |
| 23                   |      | a        | 215.80      | 3.05878      | YES             | YES   |
| 24                   |      | a        | 225.76      | 3.67353      | YES             | YES   |
| 25                   |      | a        | 232.04      | 1.75809      | YES             | YES   |
| 26                   |      | a        | 244.85      | 3.08035      | YES             | YES   |
| 27                   |      | a        | 247.67      | 2.42187      | YES             | YES   |
| 28                   |      | a        | 258.87      | 0.20244      | YES             | YES   |
| 29                   |      | a        | 267.11      | 0.50524      | YES             | YES   |
| 30                   |      | a        | 271.09      | 0.48836      | YES             | YES   |
| 31                   |      | a        | 274.89      | 7.29526      | YES             | YES   |
| 32                   |      | a        | 296.26      | 11.85052     | YES             | YES   |
| 33                   |      | a        | 306.08      | 9.42743      | YES             | YES   |
| 34                   |      | a        | 315.42      | 17.71930     | YES             | YES   |
| 35                   |      | a        | 318.24      | 7.38017      | YES             | YES   |
| 36                   |      | a        | 338.76      | 0.16793      | YES             | YES   |
| 37                   |      | a        | 360.39      | 3.85581      | YES             | YES   |
| 38                   |      | a        | 402.67      | 1.11118      | YES             | YES   |
| 39                   |      | a        | 417.80      | 3.19004      | YES             | YES   |
| 40                   |      | a        | 444.75      | 0.05806      | YES             | YES   |
| 41                   |      | a        | 459.58      | 0.07860      | YES             | YES   |
| 42                   |      | a        | 462.18      | 0.00452      | YES             | YES   |
| 43                   |      | a        | 521.95      | 1.86682      | YES             | YES   |
| 44                   |      | a        | 571.07      | 0.11530      | YES             | YES   |
| 45                   |      | a        | 582.09      | 2.01592      | YES             | YES   |
| 46                   |      | a        | 591.53      | 1.09822      | YES             | YES   |
| 47                   |      | a        | 594.44      | 0.20184      | YES             | YES   |
| 48                   |      | a        | 595.86      | 0.61208      | YES             | YES   |
| 49                   |      | a        | 598.46      | 0.96118      | YES             | YES   |
| 50                   |      | a        | 628.23      | 0.52128      | YES             | YES   |

**TS<sub>AB</sub>-F<sub>1</sub>**

|                                            |                                                               |
|--------------------------------------------|---------------------------------------------------------------|
| SCF Energy (au) BP86/SV(P)                 | -1014.495826923                                               |
| SCF Energy (au) PBE0/def2-TZVPP            | -1014.352336376                                               |
| SCF Energy (au) PBE0/def2-TZVPP            | -1014.3624407338 (CH <sub>2</sub> Cl <sub>2</sub> Correction) |
| SCF Energy (au) PBE0/def2-TZVPP            | -1014.3574644742 (C <sub>6</sub> H <sub>6</sub> Correction)   |
| SCF Energy (au) PBE0/def2-TZVPP            | -1014.3568215811 (C <sub>6</sub> H <sub>12</sub> Correction)  |
| Zero Point Energy (au)                     | 0.3623772                                                     |
| Chemical Potential (kJ mol <sup>-1</sup> ) | 816.40                                                        |
| Dispersion Correction (au) PBE0/def2-TZVPP | -0.06509735                                                   |

## xyz coordinates

46

|    |            |            |            |
|----|------------|------------|------------|
| Zr | -0.6291205 | -0.8680831 | -0.1241251 |
| H  | -2.2286627 | -0.6422506 | 3.0348300  |
| N  | -1.5500795 | 0.5570401  | 1.4707041  |
| C  | -0.4904298 | 2.2897081  | 3.3830079  |
| C  | -0.3228493 | 2.5756479  | 2.0370153  |
| C  | -1.7014058 | 0.2968860  | 2.7941066  |
| C  | -1.2198890 | 1.1386429  | 3.7903456  |
| C  | 0.7575266  | 1.0543380  | -0.4603042 |
| C  | -0.0508679 | -3.2855990 | 0.5189174  |
| H  | -0.6231707 | -4.1003075 | 0.0576467  |
| C  | 1.6264996  | 2.2848815  | -0.4059259 |
| H  | 1.9716839  | 2.4926016  | 0.6346826  |
| H  | 1.0319458  | 3.1802881  | -0.7105385 |
| C  | -0.9086942 | 1.6869606  | 1.0714335  |
| C  | 1.1687895  | -2.7287476 | 0.0183550  |
| H  | 1.6896472  | -3.0310414 | -0.9004133 |
| C  | 0.8770386  | 0.0947145  | -1.3774345 |
| C  | 1.6210884  | -1.7575431 | 0.9600282  |
| H  | 2.5205267  | -1.1367927 | 0.8612333  |
| C  | -3.1747952 | -0.7986498 | -0.7235085 |
| H  | -3.8725080 | -0.3600720 | 0.0021366  |
| C  | -0.3751678 | -2.6233185 | 1.7366978  |
| H  | -1.2377118 | -2.8447550 | 2.3803669  |
| C  | 1.8705836  | 0.0984460  | -2.5097074 |
| H  | 1.4027368  | -0.2489595 | -3.4615038 |
| H  | 2.6759357  | -0.6471411 | -2.2938144 |
| C  | -1.8377144 | -2.2960448 | -1.8582308 |
| H  | -1.3680725 | -3.2292919 | -2.1976303 |
| C  | 2.8580524  | 2.1265451  | -1.3325599 |
| H  | 3.3506891  | 3.1150300  | -1.4766991 |
| H  | 3.6086100  | 1.4705351  | -0.8309322 |
| C  | 0.6690480  | -1.6750195 | 2.0070071  |
| H  | 0.7267403  | -1.0054646 | 2.8757746  |
| C  | -2.7854341 | -2.1626071 | -0.7896796 |
| H  | -3.1471113 | -2.9707224 | -0.1387278 |
| C  | -2.4761108 | -0.0828888 | -1.7449686 |
| H  | -2.5476550 | 0.9938453  | -1.9404452 |
| C  | 2.4849382  | 1.5062332  | -2.6908961 |
| H  | 3.3786291  | 1.4570451  | -3.3539325 |
| H  | 1.7442502  | 2.1652662  | -3.2021141 |
| C  | -1.6655812 | -1.0127832 | -2.4604321 |
| H  | -1.0342244 | -0.7869529 | -3.3288366 |
| F  | -1.4880937 | 2.3264403  | -0.0086082 |
| H  | -0.0813795 | 2.9803745  | 4.1402242  |
| H  | -1.4026749 | 0.9150886  | 4.8516219  |
| H  | 0.1844445  | 3.4884772  | 1.6958334  |

| vibrational spectrum |      |          |             |              |                 |       |
|----------------------|------|----------|-------------|--------------|-----------------|-------|
| #                    | mode | symmetry | wave number | IR intensity | selection rules |       |
| #                    |      |          | cm**(-1)    | km/mol       | IR              | RAMAN |
| 1                    |      | a        | -166.68     | 0.00000      | YES             | YES   |
| 2                    |      |          | -0.00       | 0.00000      | -               | -     |
| 3                    |      |          | -0.00       | 0.00000      | -               | -     |
| 4                    |      |          | -0.00       | 0.00000      | -               | -     |
| 5                    |      |          | -0.00       | 0.00000      | -               | -     |
| 6                    |      |          | 0.00        | 0.00000      | -               | -     |
| 7                    |      |          | 0.00        | 0.00000      | -               | -     |
| 8                    |      | a        | 19.70       | 0.05104      | YES             | YES   |
| 9                    |      | a        | 41.13       | 0.15473      | YES             | YES   |
| 10                   |      | a        | 48.95       | 0.06478      | YES             | YES   |
| 11                   |      | a        | 54.47       | 0.22085      | YES             | YES   |
| 12                   |      | a        | 75.07       | 1.55817      | YES             | YES   |
| 13                   |      | a        | 90.32       | 0.36172      | YES             | YES   |
| 14                   |      | a        | 113.93      | 0.61835      | YES             | YES   |
| 15                   |      | a        | 129.20      | 0.22130      | YES             | YES   |
| 16                   |      | a        | 137.10      | 0.44700      | YES             | YES   |
| 17                   |      | a        | 143.79      | 0.61449      | YES             | YES   |
| 18                   |      | a        | 161.43      | 1.12151      | YES             | YES   |
| 19                   |      | a        | 187.01      | 0.57706      | YES             | YES   |
| 20                   |      | a        | 205.37      | 11.07069     | YES             | YES   |
| 21                   |      | a        | 222.77      | 0.38606      | YES             | YES   |
| 22                   |      | a        | 225.89      | 1.33287      | YES             | YES   |
| 23                   |      | a        | 231.23      | 3.50197      | YES             | YES   |
| 24                   |      | a        | 242.35      | 1.63731      | YES             | YES   |
| 25                   |      | a        | 258.01      | 0.39481      | YES             | YES   |
| 26                   |      | a        | 281.48      | 4.21314      | YES             | YES   |
| 27                   |      | a        | 292.27      | 7.49121      | YES             | YES   |
| 28                   |      | a        | 300.64      | 17.49084     | YES             | YES   |
| 29                   |      | a        | 312.75      | 2.53037      | YES             | YES   |
| 30                   |      | a        | 334.18      | 13.91735     | YES             | YES   |
| 31                   |      | a        | 374.89      | 12.45024     | YES             | YES   |
| 32                   |      | a        | 426.65      | 7.11152      | YES             | YES   |
| 33                   |      | a        | 447.68      | 12.81031     | YES             | YES   |
| 34                   |      | a        | 461.98      | 0.69103      | YES             | YES   |
| 35                   |      | a        | 484.40      | 5.67086      | YES             | YES   |
| 36                   |      | a        | 510.84      | 8.44167      | YES             | YES   |
| 37                   |      | a        | 527.97      | 37.89608     | YES             | YES   |
| 38                   |      | a        | 592.56      | 0.36919      | YES             | YES   |
| 39                   |      | a        | 594.49      | 0.15374      | YES             | YES   |
| 40                   |      | a        | 595.48      | 0.76850      | YES             | YES   |
| 41                   |      | a        | 598.20      | 0.67354      | YES             | YES   |
| 42                   |      | a        | 614.66      | 13.50980     | YES             | YES   |
| 43                   |      | a        | 688.01      | 1.42576      | YES             | YES   |
| 44                   |      | a        | 703.46      | 90.96815     | YES             | YES   |
| 45                   |      | a        | 727.84      | 112.21949    | YES             | YES   |
| 46                   |      | a        | 770.58      | 12.86320     | YES             | YES   |
| 47                   |      | a        | 775.15      | 108.37473    | YES             | YES   |
| 48                   |      | a        | 782.36      | 24.60553     | YES             | YES   |
| 49                   |      | a        | 782.91      | 108.30024    | YES             | YES   |
| 50                   |      | a        | 786.17      | 90.09376     | YES             | YES   |

**TS<sub>AB</sub>-F<sub>2</sub>**

|                                            |                                                               |
|--------------------------------------------|---------------------------------------------------------------|
| SCF Energy (au) BP86/SV(P)                 | -1113.673574062                                               |
| SCF Energy (au) PBE0/def2-TZVPP            | -1113.552031308                                               |
| SCF Energy (au) PBE0/def2-TZVPP            | -1113.5613205067 (CH <sub>2</sub> Cl <sub>2</sub> Correction) |
| SCF Energy (au) PBE0/def2-TZVPP            | -1113.5568359437 (C <sub>6</sub> H <sub>6</sub> Correction)   |
| SCF Energy (au) PBE0/def2-TZVPP            | -1113.5562355960 (C <sub>6</sub> H <sub>12</sub> Correction)  |
| Zero Point Energy (au)                     | 0.3546902                                                     |
| Chemical Potential (kJ mol <sup>-1</sup> ) | 794.29                                                        |
| Dispersion Correction (au) PBE0/def2-TZVPP | -0.06543014                                                   |

xyz coordinates

46

|    |            |            |            |
|----|------------|------------|------------|
| Zr | -0.6331295 | -0.8458026 | -0.1035136 |
| F  | -2.4267403 | -0.6758892 | 3.0704669  |
| N  | -1.5766739 | 0.6661279  | 1.4598662  |
| C  | -0.4105246 | 2.3229947  | 3.3717315  |
| C  | -0.2536505 | 2.6241701  | 2.0248635  |
| C  | -1.7178096 | 0.4257119  | 2.7679892  |
| C  | -1.1840610 | 1.2074213  | 3.7856388  |
| C  | 0.7970105  | 1.0135191  | -0.4957665 |
| C  | 0.0936501  | -3.2394019 | 0.3976999  |
| H  | -0.3150350 | -4.0473553 | -0.2229094 |
| C  | 1.6847564  | 2.2306816  | -0.4667867 |
| H  | 2.0538975  | 2.4423942  | 0.5651283  |
| H  | 1.1006618  | 3.1337806  | -0.7687819 |
| C  | -0.8894351 | 1.7740327  | 1.0659363  |
| C  | 1.3076029  | -2.5247517 | 0.1454603  |
| H  | 1.9856944  | -2.6816488 | -0.7034727 |
| C  | 0.8788339  | 0.0460401  | -1.4058203 |
| C  | 1.5107169  | -1.6192887 | 1.2297313  |
| H  | 2.3435379  | -0.9114140 | 1.3306957  |
| C  | -3.1897168 | -0.9616793 | -0.5989620 |
| H  | -3.8878316 | -0.6759312 | 0.1988295  |
| C  | -0.4665338 | -2.7549533 | 1.6165410  |
| H  | -1.3874821 | -3.1084528 | 2.0981143  |
| C  | 1.8422555  | 0.0233834  | -2.5633733 |
| H  | 1.3435841  | -0.3177083 | -3.5017736 |
| H  | 2.6386004  | -0.7366607 | -2.3660429 |
| C  | -1.7828639 | -2.1915224 | -1.9496796 |
| H  | -1.2446524 | -3.0330516 | -2.4072967 |
| C  | 2.8937549  | 2.0413727  | -1.4180810 |
| H  | 3.4028364  | 3.0186286  | -1.5808239 |
| H  | 3.6412116  | 1.3737188  | -0.9274354 |
| C  | 0.4199131  | -1.7542003 | 2.1287393  |
| H  | 0.2968903  | -1.2015292 | 3.0694931  |
| C  | -2.6950090 | -2.2664989 | -0.8459084 |
| H  | -2.9500844 | -3.1709484 | -0.2769315 |
| C  | -2.6059479 | -0.0733549 | -1.5621161 |
| H  | -2.7872217 | 1.0057096  | -1.6353167 |
| C  | 2.4791216  | 1.4192514  | -2.7640852 |
| H  | 3.3571461  | 1.3500002  | -3.4459984 |
| H  | 1.7401068  | 2.0895391  | -3.2630994 |
| C  | -1.7581854 | -0.8395261 | -2.4105357 |
| H  | -1.1869932 | -0.4612011 | -3.2673998 |
| F  | -1.4026087 | 2.4109611  | -0.0340624 |
| H  | 0.0384066  | 2.9825876  | 4.1331647  |
| H  | -1.3788502 | 0.9692929  | 4.8399816  |
| H  | 0.2808511  | 3.5214511  | 1.6859018  |

| vibrational spectrum |      |          |             |              |                 |       |
|----------------------|------|----------|-------------|--------------|-----------------|-------|
| #                    | mode | symmetry | wave number | IR intensity | selection rules |       |
| #                    |      |          | cm**(-1)    | km/mol       | IR              | RAMAN |
| 1                    |      | a        | -137.59     | 0.00000      | YES             | YES   |
| 2                    |      |          | 0.00        | 0.00000      | -               | -     |
| 3                    |      |          | 0.00        | 0.00000      | -               | -     |
| 4                    |      |          | 0.00        | 0.00000      | -               | -     |
| 5                    |      |          | 0.00        | 0.00000      | -               | -     |
| 6                    |      |          | 0.00        | 0.00000      | -               | -     |
| 7                    |      |          | 0.00        | 0.00000      | -               | -     |
| 8                    |      | a        | 23.52       | 0.03761      | YES             | YES   |
| 9                    |      | a        | 39.67       | 0.09743      | YES             | YES   |
| 10                   |      | a        | 49.54       | 0.02555      | YES             | YES   |
| 11                   |      | a        | 55.26       | 0.59768      | YES             | YES   |
| 12                   |      | a        | 75.47       | 1.85769      | YES             | YES   |
| 13                   |      | a        | 90.91       | 0.58067      | YES             | YES   |
| 14                   |      | a        | 108.74      | 1.23906      | YES             | YES   |
| 15                   |      | a        | 125.32      | 0.17408      | YES             | YES   |
| 16                   |      | a        | 130.36      | 0.21613      | YES             | YES   |
| 17                   |      | a        | 134.71      | 0.94920      | YES             | YES   |
| 18                   |      | a        | 145.45      | 1.06939      | YES             | YES   |
| 19                   |      | a        | 157.53      | 0.59023      | YES             | YES   |
| 20                   |      | a        | 204.32      | 13.02749     | YES             | YES   |
| 21                   |      | a        | 218.37      | 1.47829      | YES             | YES   |
| 22                   |      | a        | 229.00      | 2.01388      | YES             | YES   |
| 23                   |      | a        | 233.24      | 2.52429      | YES             | YES   |
| 24                   |      | a        | 239.47      | 1.15276      | YES             | YES   |
| 25                   |      | a        | 250.37      | 1.97175      | YES             | YES   |
| 26                   |      | a        | 267.74      | 1.10180      | YES             | YES   |
| 27                   |      | a        | 282.54      | 5.48882      | YES             | YES   |
| 28                   |      | a        | 292.98      | 3.81145      | YES             | YES   |
| 29                   |      | a        | 297.81      | 15.92383     | YES             | YES   |
| 30                   |      | a        | 308.98      | 2.32108      | YES             | YES   |
| 31                   |      | a        | 325.01      | 19.44497     | YES             | YES   |
| 32                   |      | a        | 353.83      | 15.12387     | YES             | YES   |
| 33                   |      | a        | 426.34      | 4.55233      | YES             | YES   |
| 34                   |      | a        | 445.78      | 9.47627      | YES             | YES   |
| 35                   |      | a        | 462.97      | 0.34718      | YES             | YES   |
| 36                   |      | a        | 497.35      | 11.51557     | YES             | YES   |
| 37                   |      | a        | 511.36      | 0.54239      | YES             | YES   |
| 38                   |      | a        | 521.54      | 13.52615     | YES             | YES   |
| 39                   |      | a        | 552.13      | 2.13030      | YES             | YES   |
| 40                   |      | a        | 591.49      | 54.38098     | YES             | YES   |
| 41                   |      | a        | 592.91      | 1.05430      | YES             | YES   |
| 42                   |      | a        | 596.02      | 0.31181      | YES             | YES   |
| 43                   |      | a        | 598.71      | 14.96162     | YES             | YES   |
| 44                   |      | a        | 600.81      | 47.55663     | YES             | YES   |
| 45                   |      | a        | 686.16      | 5.06076      | YES             | YES   |
| 46                   |      | a        | 695.97      | 8.50293      | YES             | YES   |
| 47                   |      | a        | 708.00      | 64.80646     | YES             | YES   |
| 48                   |      | a        | 741.98      | 109.98521    | YES             | YES   |
| 49                   |      | a        | 778.77      | 3.54152      | YES             | YES   |
| 50                   |      | a        | 780.63      | 140.18378    | YES             | YES   |



**TS<sub>AB</sub>-F<sub>3</sub>**

|                                            |                                                               |
|--------------------------------------------|---------------------------------------------------------------|
| SCF Energy (au) BP86/SV(P)                 | -1212.843539896                                               |
| SCF Energy (au) PBE0/def2-TZVPP            | -1212.745394619                                               |
| SCF Energy (au) PBE0/def2-TZVPP            | -1212.7542711724 (CH <sub>2</sub> Cl <sub>2</sub> Correction) |
| SCF Energy (au) PBE0/def2-TZVPP            | -1212.7499442341 (C <sub>6</sub> H <sub>6</sub> Correction)   |
| SCF Energy (au) PBE0/def2-TZVPP            | -1212.7493788463 (C <sub>6</sub> H <sub>12</sub> Correction)  |
| Zero Point Energy (au)                     | 0.3467691                                                     |
| Chemical Potential (kJ mol <sup>-1</sup> ) | 770.20                                                        |
| Dispersion Correction (au) PBE0/def2-TZVPP | -0.06555543                                                   |

xyz coordinates

46

|    |            |            |            |
|----|------------|------------|------------|
| Zr | -0.6348696 | -0.8525213 | -0.1122755 |
| F  | -2.3840117 | -0.6818536 | 3.0913424  |
| N  | -1.5824165 | 0.6708087  | 1.4651194  |
| C  | -0.4107792 | 2.3255419  | 3.3533364  |
| C  | -0.2794607 | 2.6530425  | 2.0111010  |
| C  | -1.6968937 | 0.4255499  | 2.7730974  |
| C  | -1.1554410 | 1.2043078  | 3.7899974  |
| C  | 0.7888602  | 0.9997393  | -0.5000808 |
| C  | 0.0840680  | -3.2489620 | 0.3840178  |
| H  | -0.3284439 | -4.0542226 | -0.2375491 |
| C  | 1.6721832  | 2.2199919  | -0.4645153 |
| H  | 2.0324971  | 2.4342238  | 0.5702333  |
| H  | 1.0875436  | 3.1212357  | -0.7716148 |
| C  | -0.9160957 | 1.7921166  | 1.0714183  |
| C  | 1.3001447  | -2.5377028 | 0.1309608  |
| H  | 1.9762187  | -2.6951208 | -0.7194809 |
| C  | 0.8785134  | 0.0358910  | -1.4138602 |
| C  | 1.5093192  | -1.6364027 | 1.2174175  |
| H  | 2.3456860  | -0.9327704 | 1.3190664  |
| C  | -3.1927665 | -0.9593417 | -0.6063368 |
| H  | -3.8912489 | -0.6717391 | 0.1905642  |
| C  | -0.4718819 | -2.7659429 | 1.6051417  |
| H  | -1.3922408 | -3.1189910 | 2.0882963  |
| C  | 1.8470316  | 0.0189850  | -2.5669505 |
| H  | 1.3531366  | -0.3180354 | -3.5093045 |
| H  | 2.6428236  | -0.7415735 | -2.3693529 |
| C  | -1.7922181 | -2.1939982 | -1.9587287 |
| H  | -1.2578986 | -3.0373761 | -2.4173993 |
| C  | 2.8885132  | 2.0353211  | -1.4073468 |
| H  | 3.3974320  | 3.0135848  | -1.5640167 |
| H  | 3.6333305  | 1.3674858  | -0.9130005 |
| C  | 0.4195427  | -1.7695105 | 2.1179168  |
| H  | 0.3035360  | -1.2227390 | 3.0630709  |
| C  | -2.7042481 | -2.2661722 | -0.8549507 |
| H  | -2.9630614 | -3.1700654 | -0.2868277 |
| C  | -2.6055529 | -0.0725865 | -1.5690654 |
| H  | -2.7849668 | 1.0065827  | -1.6440983 |
| C  | 2.4840305  | 1.4163485  | -2.7580338 |
| H  | 3.3669953  | 1.3500827  | -3.4337641 |
| H  | 1.7481433  | 2.0875272  | -3.2604788 |
| C  | -1.7614501 | -0.8418222 | -2.4183566 |
| H  | -1.1894658 | -0.4655069 | -3.2754990 |
| F  | -1.4214966 | 2.4090779  | -0.0360131 |
| F  | 0.1382767  | 3.1185577  | 4.2822979  |
| H  | -1.3071656 | 0.9756362  | 4.8523165  |
| H  | 0.2262480  | 3.5733183  | 1.6921884  |

| vibrational spectrum |      |          |             |              |                 |       |
|----------------------|------|----------|-------------|--------------|-----------------|-------|
| #                    | mode | symmetry | wave number | IR intensity | selection rules |       |
| #                    |      |          | cm**(-1)    | km/mol       | IR              | RAMAN |
| 1                    |      | a        | -129.14     | 0.00000      | YES             | YES   |
| 2                    |      |          | -0.00       | 0.00000      | -               | -     |
| 3                    |      |          | -0.00       | 0.00000      | -               | -     |
| 4                    |      |          | -0.00       | 0.00000      | -               | -     |
| 5                    |      |          | -0.00       | 0.00000      | -               | -     |
| 6                    |      |          | -0.00       | 0.00000      | -               | -     |
| 7                    |      |          | 0.00        | 0.00000      | -               | -     |
| 8                    |      | a        | 22.69       | 0.06324      | YES             | YES   |
| 9                    |      | a        | 36.71       | 0.02233      | YES             | YES   |
| 10                   |      | a        | 50.69       | 0.02235      | YES             | YES   |
| 11                   |      | a        | 54.73       | 0.55914      | YES             | YES   |
| 12                   |      | a        | 61.53       | 0.39025      | YES             | YES   |
| 13                   |      | a        | 79.80       | 0.84942      | YES             | YES   |
| 14                   |      | a        | 103.96      | 1.23969      | YES             | YES   |
| 15                   |      | a        | 122.78      | 0.52885      | YES             | YES   |
| 16                   |      | a        | 125.03      | 0.13699      | YES             | YES   |
| 17                   |      | a        | 129.63      | 0.00628      | YES             | YES   |
| 18                   |      | a        | 144.67      | 0.88636      | YES             | YES   |
| 19                   |      | a        | 155.81      | 0.30257      | YES             | YES   |
| 20                   |      | a        | 204.35      | 13.75040     | YES             | YES   |
| 21                   |      | a        | 210.19      | 2.14606      | YES             | YES   |
| 22                   |      | a        | 218.90      | 1.44593      | YES             | YES   |
| 23                   |      | a        | 228.81      | 1.51845      | YES             | YES   |
| 24                   |      | a        | 233.88      | 3.60459      | YES             | YES   |
| 25                   |      | a        | 239.45      | 2.38485      | YES             | YES   |
| 26                   |      | a        | 251.96      | 1.67526      | YES             | YES   |
| 27                   |      | a        | 275.25      | 1.75605      | YES             | YES   |
| 28                   |      | a        | 284.73      | 6.11363      | YES             | YES   |
| 29                   |      | a        | 292.77      | 3.91174      | YES             | YES   |
| 30                   |      | a        | 297.72      | 15.79732     | YES             | YES   |
| 31                   |      | a        | 309.04      | 2.53167      | YES             | YES   |
| 32                   |      | a        | 322.91      | 18.15138     | YES             | YES   |
| 33                   |      | a        | 340.69      | 10.63212     | YES             | YES   |
| 34                   |      | a        | 378.67      | 1.64304      | YES             | YES   |
| 35                   |      | a        | 425.03      | 7.98154      | YES             | YES   |
| 36                   |      | a        | 462.38      | 0.20801      | YES             | YES   |
| 37                   |      | a        | 491.51      | 11.22854     | YES             | YES   |
| 38                   |      | a        | 506.22      | 21.27895     | YES             | YES   |
| 39                   |      | a        | 515.68      | 1.20214      | YES             | YES   |
| 40                   |      | a        | 563.84      | 9.56851      | YES             | YES   |
| 41                   |      | a        | 565.93      | 173.34414    | YES             | YES   |
| 42                   |      | a        | 592.79      | 0.57724      | YES             | YES   |
| 43                   |      | a        | 593.68      | 12.37875     | YES             | YES   |
| 44                   |      | a        | 595.75      | 8.07499      | YES             | YES   |
| 45                   |      | a        | 596.97      | 11.10642     | YES             | YES   |
| 46                   |      | a        | 599.05      | 1.56891      | YES             | YES   |
| 47                   |      | a        | 617.60      | 5.97295      | YES             | YES   |
| 48                   |      | a        | 682.81      | 27.18063     | YES             | YES   |
| 49                   |      | a        | 688.02      | 7.51186      | YES             | YES   |
| 50                   |      | a        | 746.72      | 16.05291     | YES             | YES   |

**TS<sub>AB</sub>-F<sub>4</sub>**

|                                            |                                                               |
|--------------------------------------------|---------------------------------------------------------------|
| SCF Energy (au) BP86/SV(P)                 | -1311.992624443                                               |
| SCF Energy (au) PBE0/def2-TZVPP            | -1311.913176859                                               |
| SCF Energy (au) PBE0/def2-TZVPP            | -1311.9223514022 (CH <sub>2</sub> Cl <sub>2</sub> Correction) |
| SCF Energy (au) PBE0/def2-TZVPP            | -1311.9178773435 (C <sub>6</sub> H <sub>6</sub> Correction)   |
| SCF Energy (au) PBE0/def2-TZVPP            | -1311.9172929213 (C <sub>6</sub> H <sub>12</sub> Correction)  |
| Zero Point Energy (au)                     | 0.3386967                                                     |
| Chemical Potential (kJ mol <sup>-1</sup> ) | 744.83                                                        |
| Dispersion Correction (au) PBE0/def2-TZVPP | -0.06592939                                                   |

xyz coordinates

46

|    |            |            |            |
|----|------------|------------|------------|
| Zr | -0.6288339 | -0.8214002 | -0.0773583 |
| F  | -2.5324319 | -0.6469800 | 3.0344225  |
| N  | -1.5885304 | 0.7002915  | 1.4566625  |
| C  | -0.4231886 | 2.2955570  | 3.4134581  |
| C  | -0.2527032 | 2.5982814  | 2.0748010  |
| F  | 0.4237532  | 3.6993019  | 1.7097505  |
| C  | -1.7818959 | 0.4276863  | 2.7543741  |
| C  | -1.2206840 | 1.1831516  | 3.7764782  |
| F  | -1.4535058 | 0.8937090  | 5.0687585  |
| C  | 0.8520221  | 1.0195603  | -0.5163231 |
| C  | 0.1555066  | -3.2022696 | 0.3733516  |
| H  | -0.1746552 | -3.9950703 | -0.3107786 |
| C  | 1.7497040  | 2.2318369  | -0.5474781 |
| H  | 2.1610058  | 2.4667356  | 0.4597387  |
| H  | 1.1618230  | 3.1324116  | -0.8415427 |
| C  | -0.8558165 | 1.7730383  | 1.0597972  |
| C  | 1.3525003  | -2.4311546 | 0.2404506  |
| H  | 2.0941797  | -2.5229817 | -0.5631483 |
| C  | 0.8971062  | 0.0258804  | -1.3946268 |
| C  | 1.4376182  | -1.5622407 | 1.3697541  |
| H  | 2.2328406  | -0.8297365 | 1.5605490  |
| C  | -3.1740742 | -1.0405181 | -0.5489916 |
| H  | -3.8748294 | -0.8538242 | 0.2754530  |
| C  | -0.5053025 | -2.8003947 | 1.5737355  |
| H  | -1.4399137 | -3.2126572 | 1.9760820  |
| C  | 1.8242947  | -0.0472399 | -2.5795507 |
| H  | 1.2959741  | -0.4239500 | -3.4873635 |
| H  | 2.6264502  | -0.7994042 | -2.3768613 |
| C  | -1.7262934 | -2.0880907 | -2.0076847 |
| H  | -1.1467923 | -2.8622034 | -2.5296415 |
| C  | 2.9182526  | 2.0035126  | -1.5415051 |
| H  | 3.4210119  | 2.9741192  | -1.7544559 |
| H  | 3.6840055  | 1.3505648  | -1.0593580 |
| C  | 0.2973135  | -1.7908143 | 2.1883538  |
| H  | 0.0883003  | -1.3015069 | 3.1485288  |
| C  | -2.6148934 | -2.2938259 | -0.9022203 |
| H  | -2.8116265 | -3.2511183 | -0.4008528 |
| C  | -2.6607860 | -0.0539379 | -1.4576368 |
| H  | -2.9047359 | 1.0154063  | -1.4512081 |
| C  | 2.4535255  | 1.3400959  | -2.8501151 |
| H  | 3.3048597  | 1.2461169  | -3.5621407 |
| H  | 1.6962288  | 1.9943659  | -3.3427858 |
| C  | -1.7890338 | -0.7072127 | -2.3706179 |
| H  | -1.2509136 | -0.2342722 | -3.2016328 |
| F  | -1.3307237 | 2.4596857  | -0.0289636 |
| H  | 0.0138873  | 2.9414948  | 4.1903424  |

| vibrational spectrum |      |          |             |              |                 |       |
|----------------------|------|----------|-------------|--------------|-----------------|-------|
| #                    | mode | symmetry | wave number | IR intensity | selection rules |       |
| #                    |      |          | cm**(-1)    | km/mol       | IR              | RAMAN |
| 1                    |      | a        | -105.80     | 0.00000      | YES             | YES   |
| 2                    |      |          | -0.00       | 0.00000      | -               | -     |
| 3                    |      |          | -0.00       | 0.00000      | -               | -     |
| 4                    |      |          | 0.00        | 0.00000      | -               | -     |
| 5                    |      |          | 0.00        | 0.00000      | -               | -     |
| 6                    |      |          | 0.00        | 0.00000      | -               | -     |
| 7                    |      |          | 0.00        | 0.00000      | -               | -     |
| 8                    |      | a        | 20.23       | 0.01853      | YES             | YES   |
| 9                    |      | a        | 26.56       | 0.01031      | YES             | YES   |
| 10                   |      | a        | 44.87       | 0.38872      | YES             | YES   |
| 11                   |      | a        | 51.01       | 0.59831      | YES             | YES   |
| 12                   |      | a        | 61.35       | 1.17018      | YES             | YES   |
| 13                   |      | a        | 81.45       | 0.62237      | YES             | YES   |
| 14                   |      | a        | 95.30       | 0.47231      | YES             | YES   |
| 15                   |      | a        | 114.98      | 0.77756      | YES             | YES   |
| 16                   |      | a        | 123.08      | 1.13732      | YES             | YES   |
| 17                   |      | a        | 129.60      | 0.53679      | YES             | YES   |
| 18                   |      | a        | 144.77      | 1.55230      | YES             | YES   |
| 19                   |      | a        | 154.01      | 0.17028      | YES             | YES   |
| 20                   |      | a        | 162.26      | 7.08097      | YES             | YES   |
| 21                   |      | a        | 204.28      | 14.54630     | YES             | YES   |
| 22                   |      | a        | 218.44      | 1.10001      | YES             | YES   |
| 23                   |      | a        | 221.61      | 9.02350      | YES             | YES   |
| 24                   |      | a        | 230.08      | 0.19995      | YES             | YES   |
| 25                   |      | a        | 240.32      | 1.86944      | YES             | YES   |
| 26                   |      | a        | 250.67      | 1.58374      | YES             | YES   |
| 27                   |      | a        | 263.78      | 0.96454      | YES             | YES   |
| 28                   |      | a        | 270.00      | 3.32536      | YES             | YES   |
| 29                   |      | a        | 278.88      | 2.99173      | YES             | YES   |
| 30                   |      | a        | 286.41      | 0.25941      | YES             | YES   |
| 31                   |      | a        | 293.75      | 5.28677      | YES             | YES   |
| 32                   |      | a        | 299.86      | 14.17004     | YES             | YES   |
| 33                   |      | a        | 306.98      | 2.83978      | YES             | YES   |
| 34                   |      | a        | 322.59      | 17.27529     | YES             | YES   |
| 35                   |      | a        | 352.56      | 25.65182     | YES             | YES   |
| 36                   |      | a        | 412.99      | 11.16734     | YES             | YES   |
| 37                   |      | a        | 416.39      | 4.66677      | YES             | YES   |
| 38                   |      | a        | 441.23      | 11.04835     | YES             | YES   |
| 39                   |      | a        | 461.82      | 1.18637      | YES             | YES   |
| 40                   |      | a        | 466.94      | 4.12465      | YES             | YES   |
| 41                   |      | a        | 488.18      | 24.97332     | YES             | YES   |
| 42                   |      | a        | 510.36      | 10.03111     | YES             | YES   |
| 43                   |      | a        | 591.77      | 0.77857      | YES             | YES   |
| 44                   |      | a        | 594.77      | 2.37939      | YES             | YES   |
| 45                   |      | a        | 595.47      | 0.48663      | YES             | YES   |
| 46                   |      | a        | 598.44      | 0.57935      | YES             | YES   |
| 47                   |      | a        | 614.25      | 40.85968     | YES             | YES   |
| 48                   |      | a        | 632.65      | 86.90961     | YES             | YES   |
| 49                   |      | a        | 648.89      | 14.21188     | YES             | YES   |
| 50                   |      | a        | 681.76      | 22.60950     | YES             | YES   |

**TS<sub>AB</sub>-F<sub>5</sub>**

|                                            |                                                               |
|--------------------------------------------|---------------------------------------------------------------|
| SCF Energy (au) BP86/SV(P)                 | -1411.149516407                                               |
| SCF Energy (au) PBE0/def2-TZVPP            | -1411.093659723                                               |
| SCF Energy (au) PBE0/def2-TZVPP            | -1411.1017374816 (CH <sub>2</sub> Cl <sub>2</sub> Correction) |
| SCF Energy (au) PBE0/def2-TZVPP            | -1411.0978185371 (C <sub>6</sub> H <sub>6</sub> Correction)   |
| SCF Energy (au) PBE0/def2-TZVPP            | -1411.0973037155 (C <sub>6</sub> H <sub>12</sub> Correction)  |
| Zero Point Energy (au)                     | 0.3308871                                                     |
| Chemical Potential (kJ mol <sup>-1</sup> ) | 721.10                                                        |
| Dispersion Correction (au) PBE0/def2-TZVPP | -0.06611996                                                   |

xyz coordinates

46

|    |            |            |            |
|----|------------|------------|------------|
| Zr | -0.6320770 | -0.8307687 | -0.0915999 |
| F  | -2.4808449 | -0.6691503 | 3.0575497  |
| N  | -1.5968684 | 0.6938909  | 1.4601692  |
| C  | -0.4212885 | 2.3010359  | 3.3905128  |
| C  | -0.2839062 | 2.6267052  | 2.0455150  |
| F  | 0.3548905  | 3.7496743  | 1.6922348  |
| C  | -1.7580333 | 0.4173167  | 2.7590104  |
| C  | -1.1947652 | 1.1721658  | 3.7803177  |
| F  | -1.3832551 | 0.8898668  | 5.0762953  |
| C  | 0.8310437  | 1.0114818  | -0.5203242 |
| C  | 0.1368785  | -3.2151782 | 0.3660160  |
| H  | -0.2118252 | -4.0105127 | -0.3056033 |
| C  | 1.7268401  | 2.2257502  | -0.5313170 |
| H  | 2.1215393  | 2.4564784  | 0.4840446  |
| H  | 1.1419523  | 3.1268478  | -0.8304683 |
| C  | -0.8909380 | 1.7830834  | 1.0578882  |
| C  | 1.3388386  | -2.4560417 | 0.2070265  |
| H  | 2.0663168  | -2.5611257 | -0.6078543 |
| C  | 0.8905839  | 0.0247122  | -1.4065574 |
| C  | 1.4528195  | -1.5823251 | 1.3298441  |
| H  | 2.2589907  | -0.8574889 | 1.5027653  |
| C  | -3.1818675 | -1.0122580 | -0.5696776 |
| H  | -3.8843962 | -0.7920509 | 0.2450228  |
| C  | -0.5000430 | -2.7982020 | 1.5733043  |
| H  | -1.4307585 | -3.2000786 | 1.9945549  |
| C  | 1.8328759  | -0.0368280 | -2.5798466 |
| H  | 1.3166926  | -0.4046124 | -3.4982860 |
| H  | 2.6321022  | -0.7912660 | -2.3739607 |
| C  | -1.7482744 | -2.1234008 | -1.9940696 |
| H  | -1.1837829 | -2.9215486 | -2.4957787 |
| C  | 2.9111289  | 2.0062087  | -1.5082228 |
| H  | 3.4169307  | 2.9783972  | -1.7060330 |
| H  | 3.6695233  | 1.3496399  | -1.0194155 |
| C  | 0.3236333  | -1.7924316 | 2.1676408  |
| H  | 0.1381613  | -1.2972772 | 3.1297419  |
| C  | -2.6463098 | -2.2847766 | -0.8885715 |
| H  | -2.8647720 | -3.2253893 | -0.3650160 |
| C  | -2.6426049 | -0.0578082 | -1.4971366 |
| H  | -2.8671245 | 1.0154767  | -1.5199972 |
| C  | 2.4659925  | 1.3530075  | -2.8289693 |
| H  | 3.3279114  | 1.2649391  | -3.5288433 |
| H  | 1.7162182  | 2.0113507  | -3.3276806 |
| C  | -1.7795611 | -0.7507483 | -2.3898039 |
| H  | -1.2299018 | -0.3099325 | -3.2307900 |
| F  | -1.3721421 | 2.4475339  | -0.0362407 |
| F  | 0.1134765  | 3.0756369  | 4.3326096  |

| vibrational spectrum |      |          |             |              |                 |       |
|----------------------|------|----------|-------------|--------------|-----------------|-------|
| #                    | mode | symmetry | wave number | IR intensity | selection rules |       |
| #                    |      |          | cm**(-1)    | km/mol       | IR              | RAMAN |
| 1                    |      | a        | -101.53     | 0.00000      | YES             | YES   |
| 2                    |      |          | -0.00       | 0.00000      | -               | -     |
| 3                    |      |          | 0.00        | 0.00000      | -               | -     |
| 4                    |      |          | 0.00        | 0.00000      | -               | -     |
| 5                    |      |          | 0.00        | 0.00000      | -               | -     |
| 6                    |      |          | 0.00        | 0.00000      | -               | -     |
| 7                    |      |          | 0.00        | 0.00000      | -               | -     |
| 8                    |      | a        | 21.02       | 0.06988      | YES             | YES   |
| 9                    |      | a        | 26.55       | 0.01414      | YES             | YES   |
| 10                   |      | a        | 44.17       | 0.52708      | YES             | YES   |
| 11                   |      | a        | 51.23       | 0.72574      | YES             | YES   |
| 12                   |      | a        | 54.79       | 0.27448      | YES             | YES   |
| 13                   |      | a        | 79.79       | 0.98405      | YES             | YES   |
| 14                   |      | a        | 91.30       | 0.02798      | YES             | YES   |
| 15                   |      | a        | 109.05      | 1.71590      | YES             | YES   |
| 16                   |      | a        | 113.74      | 0.41951      | YES             | YES   |
| 17                   |      | a        | 128.78      | 0.50648      | YES             | YES   |
| 18                   |      | a        | 144.04      | 1.74145      | YES             | YES   |
| 19                   |      | a        | 150.25      | 1.44517      | YES             | YES   |
| 20                   |      | a        | 154.42      | 1.74030      | YES             | YES   |
| 21                   |      | a        | 167.71      | 4.03376      | YES             | YES   |
| 22                   |      | a        | 205.02      | 18.48378     | YES             | YES   |
| 23                   |      | a        | 218.76      | 1.79746      | YES             | YES   |
| 24                   |      | a        | 227.75      | 5.32370      | YES             | YES   |
| 25                   |      | a        | 230.63      | 0.89914      | YES             | YES   |
| 26                   |      | a        | 241.24      | 1.91749      | YES             | YES   |
| 27                   |      | a        | 251.14      | 1.21925      | YES             | YES   |
| 28                   |      | a        | 257.47      | 0.18974      | YES             | YES   |
| 29                   |      | a        | 261.83      | 0.84847      | YES             | YES   |
| 30                   |      | a        | 279.48      | 4.34956      | YES             | YES   |
| 31                   |      | a        | 289.01      | 5.06817      | YES             | YES   |
| 32                   |      | a        | 292.67      | 2.27033      | YES             | YES   |
| 33                   |      | a        | 296.74      | 11.28436     | YES             | YES   |
| 34                   |      | a        | 307.33      | 0.11864      | YES             | YES   |
| 35                   |      | a        | 316.33      | 23.13386     | YES             | YES   |
| 36                   |      | a        | 322.97      | 2.19723      | YES             | YES   |
| 37                   |      | a        | 351.43      | 18.15799     | YES             | YES   |
| 38                   |      | a        | 411.07      | 1.78558      | YES             | YES   |
| 39                   |      | a        | 417.77      | 10.91793     | YES             | YES   |
| 40                   |      | a        | 443.40      | 4.14634      | YES             | YES   |
| 41                   |      | a        | 461.98      | 0.56017      | YES             | YES   |
| 42                   |      | a        | 464.01      | 0.09137      | YES             | YES   |
| 43                   |      | a        | 510.70      | 13.82530     | YES             | YES   |
| 44                   |      | a        | 552.29      | 70.67992     | YES             | YES   |
| 45                   |      | a        | 561.40      | 78.63164     | YES             | YES   |
| 46                   |      | a        | 591.28      | 1.11462      | YES             | YES   |
| 47                   |      | a        | 593.48      | 1.69775      | YES             | YES   |
| 48                   |      | a        | 595.45      | 0.10485      | YES             | YES   |
| 49                   |      | a        | 597.65      | 0.82507      | YES             | YES   |
| 50                   |      | a        | 603.31      | 18.77759     | YES             | YES   |

**B-F<sub>1</sub>**

|                                            |                                                               |
|--------------------------------------------|---------------------------------------------------------------|
| SCF Energy (au) BP86/SV(P)                 | -1014.537487476                                               |
| SCF Energy (au) PBE0/def2-TZVPP            | -1014.400645628                                               |
| SCF Energy (au) PBE0/def2-TZVPP            | -1014.4164403536 (CH <sub>2</sub> Cl <sub>2</sub> Correction) |
| SCF Energy (au) PBE0/def2-TZVPP            | -1014.4085402076 (C <sub>6</sub> H <sub>6</sub> Correction)   |
| SCF Energy (au) PBE0/def2-TZVPP            | -1014.4075382066 (C <sub>6</sub> H <sub>12</sub> Correction)  |
| Zero Point Energy (au)                     | 0.3631827                                                     |
| Chemical Potential (kJ mol <sup>-1</sup> ) | 815.96                                                        |
| Dispersion Correction (au) PBE0/def2-TZVPP | -0.06422355                                                   |

xyz coordinates

46

|    |            |            |            |
|----|------------|------------|------------|
| Zr | -0.6489998 | -1.1837001 | 0.0160034  |
| H  | -0.4462969 | 3.2232235  | 4.0838482  |
| H  | -2.2730520 | -0.4492931 | 2.6834086  |
| N  | -0.9657750 | 0.5083110  | 1.3427142  |
| C  | -0.6549568 | 2.5044106  | 3.2721175  |
| C  | 0.0052107  | 2.6194525  | 2.0767788  |
| H  | 0.7371928  | 3.4254038  | 1.9212634  |
| C  | -1.6667640 | 0.4630103  | 2.5207018  |
| C  | -1.5848138 | 1.4341132  | 3.4955836  |
| H  | -2.1554010 | 1.3421564  | 4.4314661  |
| C  | 0.7316499  | 1.5060707  | -0.1424821 |
| C  | 0.0281987  | -3.6494167 | 0.3666412  |
| H  | -0.4719982 | -4.4336788 | -0.2172369 |
| C  | 1.5376908  | 2.7281211  | -0.5640603 |
| H  | 1.9332382  | 3.2617559  | 0.3291129  |
| H  | 0.8345356  | 3.4480269  | -1.0476151 |
| C  | -0.3430012 | 1.7390603  | 0.9252289  |
| C  | 1.2280618  | -2.9723969 | 0.0041758  |
| H  | 1.8099198  | -3.1352353 | -0.9144584 |
| C  | 0.8502084  | 0.2927417  | -0.7630328 |
| C  | 1.5529346  | -2.0517467 | 1.0501585  |
| H  | 2.4228826  | -1.3836696 | 1.0767784  |
| C  | -3.1197811 | -1.1850828 | -0.6872273 |
| H  | -3.8793461 | -1.1238370 | 0.1064159  |
| C  | -0.4048159 | -3.1347250 | 1.6288930  |
| H  | -1.2918143 | -3.4654146 | 2.1894707  |
| C  | 1.8495320  | 0.0729900  | -1.8874321 |
| H  | 1.4311743  | -0.6253483 | -2.6510361 |
| H  | 2.7454638  | -0.4595962 | -1.4792638 |
| C  | -1.5974248 | -2.0147009 | -2.2138234 |
| H  | -1.0014270 | -2.7076875 | -2.8250748 |
| C  | 2.7095635  | 2.4038946  | -1.5059091 |
| H  | 3.0821020  | 3.3402265  | -1.9786691 |
| H  | 3.5593918  | 1.9908692  | -0.9125463 |
| C  | 0.5489409  | -2.1555415 | 2.0555805  |
| H  | 0.5079790  | -1.5736897 | 2.9863393  |
| C  | -2.5563840 | -2.3848667 | -1.2196500 |
| H  | -2.8282792 | -3.4092741 | -0.9302265 |
| C  | -2.5172132 | -0.0748780 | -1.3509755 |
| H  | -2.6805604 | 0.9859393  | -1.1213412 |
| C  | 2.3042405  | 1.3765372  | -2.5683981 |
| H  | 3.1458203  | 1.1747265  | -3.2696623 |
| H  | 1.4666778  | 1.7869948  | -3.1806187 |
| C  | -1.5796608 | -0.5863626 | -2.2969067 |
| H  | -0.9674006 | 0.0165901  | -2.9792820 |
| F  | -1.3874434 | 2.5155157  | 0.1442477  |

| vibrational spectrum |      |          |             |              | selection rules |       |
|----------------------|------|----------|-------------|--------------|-----------------|-------|
| #                    | mode | symmetry | wave number | IR intensity | IR              | RAMAN |
| #                    |      |          | cm**(-1)    | km/mol       |                 |       |
| 1                    |      |          | -0.00       | 0.00000      | -               | -     |
| 2                    |      |          | -0.00       | 0.00000      | -               | -     |
| 3                    |      |          | -0.00       | 0.00000      | -               | -     |
| 4                    |      |          | 0.00        | 0.00000      | -               | -     |
| 5                    |      |          | 0.00        | 0.00000      | -               | -     |
| 6                    |      |          | 0.00        | 0.00000      | -               | -     |
| 7                    |      | a        | 21.30       | 0.01194      | YES             | YES   |
| 8                    |      | a        | 30.98       | 0.02796      | YES             | YES   |
| 9                    |      | a        | 38.95       | 0.15733      | YES             | YES   |
| 10                   |      | a        | 54.34       | 0.33916      | YES             | YES   |
| 11                   |      | a        | 67.67       | 0.04404      | YES             | YES   |
| 12                   |      | a        | 80.78       | 0.30158      | YES             | YES   |
| 13                   |      | a        | 85.49       | 0.17878      | YES             | YES   |
| 14                   |      | a        | 110.69      | 0.30351      | YES             | YES   |
| 15                   |      | a        | 133.16      | 0.93381      | YES             | YES   |
| 16                   |      | a        | 142.64      | 2.10621      | YES             | YES   |
| 17                   |      | a        | 174.66      | 5.30391      | YES             | YES   |
| 18                   |      | a        | 181.60      | 5.81067      | YES             | YES   |
| 19                   |      | a        | 195.77      | 9.52206      | YES             | YES   |
| 20                   |      | a        | 214.88      | 2.67556      | YES             | YES   |
| 21                   |      | a        | 231.93      | 1.68389      | YES             | YES   |
| 22                   |      | a        | 243.13      | 11.30672     | YES             | YES   |
| 23                   |      | a        | 248.68      | 0.12907      | YES             | YES   |
| 24                   |      | a        | 261.66      | 0.47424      | YES             | YES   |
| 25                   |      | a        | 266.62      | 4.78979      | YES             | YES   |
| 26                   |      | a        | 285.22      | 0.58672      | YES             | YES   |
| 27                   |      | a        | 298.83      | 10.46536     | YES             | YES   |
| 28                   |      | a        | 328.39      | 15.45539     | YES             | YES   |
| 29                   |      | a        | 338.60      | 12.88475     | YES             | YES   |
| 30                   |      | a        | 367.94      | 14.96921     | YES             | YES   |
| 31                   |      | a        | 402.31      | 3.21509      | YES             | YES   |
| 32                   |      | a        | 428.10      | 19.05571     | YES             | YES   |
| 33                   |      | a        | 477.57      | 4.22659      | YES             | YES   |
| 34                   |      | a        | 482.84      | 3.39663      | YES             | YES   |
| 35                   |      | a        | 501.05      | 6.19387      | YES             | YES   |
| 36                   |      | a        | 540.23      | 42.63438     | YES             | YES   |
| 37                   |      | a        | 570.32      | 4.60364      | YES             | YES   |
| 38                   |      | a        | 589.13      | 0.32935      | YES             | YES   |
| 39                   |      | a        | 594.25      | 0.44894      | YES             | YES   |
| 40                   |      | a        | 597.72      | 0.21842      | YES             | YES   |
| 41                   |      | a        | 598.44      | 0.00538      | YES             | YES   |
| 42                   |      | a        | 644.68      | 13.40843     | YES             | YES   |
| 43                   |      | a        | 656.43      | 24.71647     | YES             | YES   |
| 44                   |      | a        | 700.49      | 1.57598      | YES             | YES   |
| 45                   |      | a        | 709.29      | 118.21191    | YES             | YES   |
| 46                   |      | a        | 740.49      | 6.35125      | YES             | YES   |
| 47                   |      | a        | 784.48      | 162.31793    | YES             | YES   |
| 48                   |      | a        | 786.35      | 79.81233     | YES             | YES   |
| 49                   |      | a        | 790.55      | 23.62093     | YES             | YES   |
| 50                   |      | a        | 792.49      | 54.11270     | YES             | YES   |



**B-F<sub>2</sub>**

|                                            |                                                               |
|--------------------------------------------|---------------------------------------------------------------|
| SCF Energy (au) BP86/SV(P)                 | -1113.720841777                                               |
| SCF Energy (au) PBE0/def2-TZVPP            | -1113.605921010                                               |
| SCF Energy (au) PBE0/def2-TZVPP            | -1113.6202357326 (CH <sub>2</sub> Cl <sub>2</sub> Correction) |
| SCF Energy (au) PBE0/def2-TZVPP            | -1113.6131472310 (C <sub>6</sub> H <sub>6</sub> Correction)   |
| SCF Energy (au) PBE0/def2-TZVPP            | -1113.6122379287 (C <sub>6</sub> H <sub>12</sub> Correction)  |
| Zero Point Energy (au)                     | 0.3558759                                                     |
| Chemical Potential (kJ mol <sup>-1</sup> ) | 796.54                                                        |
| Dispersion Correction (au) PBE0/def2-TZVPP | -0.06489287                                                   |

xyz coordinates

46

|    |            |            |            |
|----|------------|------------|------------|
| Zr | -0.6968773 | -1.1857787 | 0.0597286  |
| H  | -0.4304952 | 3.2332848  | 4.0988769  |
| F  | -2.3376974 | -0.6347835 | 2.5964583  |
| N  | -0.9503687 | 0.5858987  | 1.3162488  |
| C  | -0.6292079 | 2.5253218  | 3.2757932  |
| C  | 0.0184202  | 2.6791269  | 2.0772159  |
| H  | 0.7292897  | 3.5051014  | 1.9297700  |
| C  | -1.6185390 | 0.5333516  | 2.4809427  |
| C  | -1.5517433 | 1.4424160  | 3.5041940  |
| H  | -2.1219724 | 1.3152152  | 4.4336166  |
| C  | 0.7367217  | 1.5440177  | -0.1499798 |
| C  | 0.0761027  | -3.6319838 | 0.3271048  |
| H  | -0.3831530 | -4.4137922 | -0.2927757 |
| C  | 1.5754754  | 2.7331500  | -0.5932895 |
| H  | 1.9841955  | 3.2712344  | 0.2920692  |
| H  | 0.8959101  | 3.4652703  | -1.0925909 |
| C  | -0.3308300 | 1.8192662  | 0.9064099  |
| C  | 1.2500376  | -2.8906047 | 0.0047532  |
| H  | 1.8521069  | -2.9983045 | -0.9085146 |
| C  | 0.8105477  | 0.3098167  | -0.7332758 |
| C  | 1.5235428  | -1.9978567 | 1.0886644  |
| H  | 2.3637341  | -1.2949158 | 1.1510129  |
| C  | -3.1503411 | -1.2489858 | -0.6858336 |
| H  | -3.9177921 | -1.2467083 | 0.1018492  |
| C  | -0.3968422 | -3.1809263 | 1.5967381  |
| H  | -1.2824094 | -3.5568427 | 2.1290424  |
| C  | 1.8034786  | 0.0373592  | -1.8535798 |
| H  | 1.3672427  | -0.6668592 | -2.6017138 |
| H  | 2.6864171  | -0.5080623 | -1.4345240 |
| C  | -1.5667639 | -1.9634270 | -2.2085379 |
| H  | -0.9358199 | -2.6105481 | -2.8346877 |
| C  | 2.7351231  | 2.3521323  | -1.5289300 |
| H  | 3.1352453  | 3.2642367  | -2.0257394 |
| H  | 3.5733624  | 1.9268035  | -0.9278965 |
| C  | 0.5078643  | -2.1754643 | 2.0714578  |
| H  | 0.4327153  | -1.6357295 | 3.0252917  |
| C  | -2.5307147 | -2.4054614 | -1.2475873 |
| H  | -2.7685540 | -3.4485577 | -0.9981319 |
| C  | -2.5761653 | -0.0929215 | -1.2957074 |
| H  | -2.7916884 | 0.9531607  | -1.0431776 |
| C  | 2.2929246  | 1.3124659  | -2.5649887 |
| H  | 3.1242821  | 1.0694906  | -3.2654160 |
| H  | 1.4649930  | 1.7340187  | -3.1828848 |
| C  | -1.6036230 | -0.5336466 | -2.2422012 |
| H  | -1.0051856 | 0.1166964  | -2.8920520 |
| F  | -1.3629489 | 2.5933250  | 0.1367775  |

| vibrational spectrum |      |          |             |              |                 |       |
|----------------------|------|----------|-------------|--------------|-----------------|-------|
| #                    | mode | symmetry | wave number | IR intensity | selection rules |       |
| #                    |      |          | cm**(-1)    | km/mol       | IR              | RAMAN |
| 1                    |      |          | -0.00       | 0.00000      | -               | -     |
| 2                    |      |          | 0.00        | 0.00000      | -               | -     |
| 3                    |      |          | 0.00        | 0.00000      | -               | -     |
| 4                    |      |          | 0.00        | 0.00000      | -               | -     |
| 5                    |      |          | 0.00        | 0.00000      | -               | -     |
| 6                    |      |          | 0.00        | 0.00000      | -               | -     |
| 7                    |      | a        | 30.36       | 0.02701      | YES             | YES   |
| 8                    |      | a        | 37.06       | 0.04947      | YES             | YES   |
| 9                    |      | a        | 43.77       | 0.17586      | YES             | YES   |
| 10                   |      | a        | 56.88       | 0.13136      | YES             | YES   |
| 11                   |      | a        | 68.19       | 0.01027      | YES             | YES   |
| 12                   |      | a        | 88.07       | 0.22126      | YES             | YES   |
| 13                   |      | a        | 93.14       | 0.18912      | YES             | YES   |
| 14                   |      | a        | 101.01      | 2.30594      | YES             | YES   |
| 15                   |      | a        | 113.34      | 2.15716      | YES             | YES   |
| 16                   |      | a        | 142.54      | 0.44787      | YES             | YES   |
| 17                   |      | a        | 152.96      | 1.10859      | YES             | YES   |
| 18                   |      | a        | 180.82      | 5.36976      | YES             | YES   |
| 19                   |      | a        | 192.23      | 12.42106     | YES             | YES   |
| 20                   |      | a        | 198.99      | 1.68384      | YES             | YES   |
| 21                   |      | a        | 220.16      | 1.01332      | YES             | YES   |
| 22                   |      | a        | 237.30      | 2.21783      | YES             | YES   |
| 23                   |      | a        | 248.28      | 9.34982      | YES             | YES   |
| 24                   |      | a        | 251.56      | 0.17342      | YES             | YES   |
| 25                   |      | a        | 267.66      | 1.38336      | YES             | YES   |
| 26                   |      | a        | 269.93      | 3.81682      | YES             | YES   |
| 27                   |      | a        | 299.04      | 4.94564      | YES             | YES   |
| 28                   |      | a        | 309.20      | 2.93818      | YES             | YES   |
| 29                   |      | a        | 326.20      | 9.03974      | YES             | YES   |
| 30                   |      | a        | 334.13      | 18.22724     | YES             | YES   |
| 31                   |      | a        | 379.23      | 8.37435      | YES             | YES   |
| 32                   |      | a        | 389.50      | 11.64550     | YES             | YES   |
| 33                   |      | a        | 450.05      | 5.28417      | YES             | YES   |
| 34                   |      | a        | 480.16      | 0.79101      | YES             | YES   |
| 35                   |      | a        | 487.99      | 0.99413      | YES             | YES   |
| 36                   |      | a        | 497.54      | 4.50452      | YES             | YES   |
| 37                   |      | a        | 525.67      | 19.68415     | YES             | YES   |
| 38                   |      | a        | 567.09      | 19.22316     | YES             | YES   |
| 39                   |      | a        | 577.53      | 4.63310      | YES             | YES   |
| 40                   |      | a        | 589.38      | 0.37944      | YES             | YES   |
| 41                   |      | a        | 594.53      | 0.56028      | YES             | YES   |
| 42                   |      | a        | 598.44      | 0.15615      | YES             | YES   |
| 43                   |      | a        | 599.06      | 0.21261      | YES             | YES   |
| 44                   |      | a        | 618.87      | 15.26739     | YES             | YES   |
| 45                   |      | a        | 663.34      | 27.78177     | YES             | YES   |
| 46                   |      | a        | 685.47      | 20.70977     | YES             | YES   |
| 47                   |      | a        | 718.18      | 81.09649     | YES             | YES   |
| 48                   |      | a        | 733.77      | 9.37092      | YES             | YES   |
| 49                   |      | a        | 777.69      | 123.38243    | YES             | YES   |
| 50                   |      | a        | 788.86      | 115.40738    | YES             | YES   |

**B-F<sub>3</sub>**

|                                            |                                                               |
|--------------------------------------------|---------------------------------------------------------------|
| SCF Energy (au) BP86/SV(P)                 | -1212.891969484                                               |
| SCF Energy (au) PBE0/def2-TZVPP            | -1212.800579725                                               |
| SCF Energy (au) PBE0/def2-TZVPP            | -1212.8148894680 (CH <sub>2</sub> Cl <sub>2</sub> Correction) |
| SCF Energy (au) PBE0/def2-TZVPP            | -1212.8078085373 (C <sub>6</sub> H <sub>6</sub> Correction)   |
| SCF Energy (au) PBE0/def2-TZVPP            | -1212.8068996403 (C <sub>6</sub> H <sub>12</sub> Correction)  |
| Zero Point Energy (au)                     | 0.3480648                                                     |
| Chemical Potential (kJ mol <sup>-1</sup> ) | 772.82                                                        |
| Dispersion Correction (au) PBE0/def2-TZVPP | -0.06507800                                                   |

xyz coordinates

46

|    |            |            |            |
|----|------------|------------|------------|
| Zr | -0.6950309 | -1.1919341 | 0.0508554  |
| F  | -0.4131267 | 3.3818187  | 4.2656064  |
| F  | -2.3403873 | -0.6247372 | 2.6192793  |
| N  | -0.9526702 | 0.5771876  | 1.3192192  |
| C  | -0.6323175 | 2.5226058  | 3.2469462  |
| C  | 0.0342128  | 2.6753186  | 2.0632161  |
| H  | 0.7376723  | 3.5089854  | 1.9384453  |
| C  | -1.6162738 | 0.5323314  | 2.4840550  |
| C  | -1.5540013 | 1.4515157  | 3.5005273  |
| H  | -2.1142588 | 1.3579081  | 4.4383994  |
| C  | 0.7345635  | 1.5385032  | -0.1527881 |
| C  | 0.0722732  | -3.6369803 | 0.3176848  |
| H  | -0.3885312 | -4.4181749 | -0.3017353 |
| C  | 1.5724612  | 2.7289065  | -0.5935718 |
| H  | 1.9794571  | 3.2659161  | 0.2930579  |
| H  | 0.8931996  | 3.4608887  | -1.0934548 |
| C  | -0.3321487 | 1.8139942  | 0.9041875  |
| C  | 1.2473681  | -2.8975103 | -0.0055785 |
| H  | 1.8481228  | -3.0059133 | -0.9196583 |
| C  | 0.8094725  | 0.3051964  | -0.7377270 |
| C  | 1.5240890  | -2.0061865 | 1.0785246  |
| H  | 2.3662927  | -1.3057440 | 1.1411198  |
| C  | -3.1498075 | -1.2558107 | -0.6880931 |
| H  | -3.9168257 | -1.2544938 | 0.1001415  |
| C  | -0.3979050 | -3.1862939 | 1.5885154  |
| H  | -1.2828022 | -3.5620251 | 2.1221657  |
| C  | 1.8034693  | 0.0353629  | -1.8577759 |
| H  | 1.3680288  | -0.6674181 | -2.6076289 |
| H  | 2.6855643  | -0.5107525 | -1.4381247 |
| C  | -1.5681024 | -1.9684407 | -2.2135525 |
| H  | -0.9383472 | -2.6149849 | -2.8414413 |
| C  | 2.7338473  | 2.3498014  | -1.5277467 |
| H  | 3.1342041  | 3.2629428  | -2.0222325 |
| H  | 3.5711421  | 1.9241520  | -0.9257863 |
| C  | 0.5092872  | -2.1828349 | 2.0625061  |
| H  | 0.4382653  | -1.6456316 | 3.0180874  |
| C  | -2.5305163 | -2.4116093 | -1.2514235 |
| H  | -2.7675922 | -3.4550034 | -1.0025982 |
| C  | -2.5775840 | -0.0991287 | -1.2988399 |
| H  | -2.7935852 | 0.9467975  | -1.0458594 |
| C  | 2.2938350  | 1.3116781  | -2.5661905 |
| H  | 3.1265562  | 1.0695745  | -3.2651673 |
| H  | 1.4671772  | 1.7338005  | -3.1853190 |
| C  | -1.6064449 | -0.5386518 | -2.2471802 |
| H  | -1.0096464 | 0.1122359  | -2.8979886 |
| F  | -1.3726560 | 2.5728378  | 0.1349219  |

| vibrational spectrum |      |          |             |              |                 |       |
|----------------------|------|----------|-------------|--------------|-----------------|-------|
| #                    | mode | symmetry | wave number | IR intensity | selection rules |       |
| #                    |      |          | cm**(-1)    | km/mol       | IR              | RAMAN |
| 1                    |      |          | -0.00       | 0.00000      | -               | -     |
| 2                    |      |          | -0.00       | 0.00000      | -               | -     |
| 3                    |      |          | -0.00       | 0.00000      | -               | -     |
| 4                    |      |          | -0.00       | 0.00000      | -               | -     |
| 5                    |      |          | 0.00        | 0.00000      | -               | -     |
| 6                    |      |          | 0.00        | 0.00000      | -               | -     |
| 7                    |      | a        | 29.82       | 0.02326      | YES             | YES   |
| 8                    |      | a        | 35.61       | 0.05606      | YES             | YES   |
| 9                    |      | a        | 38.02       | 0.08134      | YES             | YES   |
| 10                   |      | a        | 54.73       | 0.05757      | YES             | YES   |
| 11                   |      | a        | 65.89       | 0.02973      | YES             | YES   |
| 12                   |      | a        | 86.85       | 0.10643      | YES             | YES   |
| 13                   |      | a        | 91.53       | 0.12022      | YES             | YES   |
| 14                   |      | a        | 97.78       | 1.44224      | YES             | YES   |
| 15                   |      | a        | 114.10      | 1.73214      | YES             | YES   |
| 16                   |      | a        | 132.11      | 1.50662      | YES             | YES   |
| 17                   |      | a        | 142.41      | 0.46055      | YES             | YES   |
| 18                   |      | a        | 176.71      | 6.25742      | YES             | YES   |
| 19                   |      | a        | 189.26      | 10.43894     | YES             | YES   |
| 20                   |      | a        | 195.53      | 2.77729      | YES             | YES   |
| 21                   |      | a        | 200.01      | 0.41545      | YES             | YES   |
| 22                   |      | a        | 217.57      | 2.37841      | YES             | YES   |
| 23                   |      | a        | 237.90      | 2.22910      | YES             | YES   |
| 24                   |      | a        | 248.49      | 9.37305      | YES             | YES   |
| 25                   |      | a        | 251.00      | 0.19388      | YES             | YES   |
| 26                   |      | a        | 261.69      | 1.33545      | YES             | YES   |
| 27                   |      | a        | 270.59      | 3.56524      | YES             | YES   |
| 28                   |      | a        | 303.04      | 9.02008      | YES             | YES   |
| 29                   |      | a        | 314.40      | 4.31773      | YES             | YES   |
| 30                   |      | a        | 333.15      | 15.86639     | YES             | YES   |
| 31                   |      | a        | 347.04      | 0.79776      | YES             | YES   |
| 32                   |      | a        | 360.65      | 6.31621      | YES             | YES   |
| 33                   |      | a        | 382.04      | 6.68945      | YES             | YES   |
| 34                   |      | a        | 398.73      | 5.63473      | YES             | YES   |
| 35                   |      | a        | 458.44      | 16.52468     | YES             | YES   |
| 36                   |      | a        | 481.20      | 0.98686      | YES             | YES   |
| 37                   |      | a        | 502.21      | 8.41392      | YES             | YES   |
| 38                   |      | a        | 519.26      | 10.15165     | YES             | YES   |
| 39                   |      | a        | 542.97      | 2.27153      | YES             | YES   |
| 40                   |      | a        | 567.80      | 18.84646     | YES             | YES   |
| 41                   |      | a        | 581.46      | 2.14134      | YES             | YES   |
| 42                   |      | a        | 589.29      | 0.37397      | YES             | YES   |
| 43                   |      | a        | 594.20      | 0.69765      | YES             | YES   |
| 44                   |      | a        | 598.33      | 0.09523      | YES             | YES   |
| 45                   |      | a        | 598.80      | 0.05095      | YES             | YES   |
| 46                   |      | a        | 618.87      | 2.81120      | YES             | YES   |
| 47                   |      | a        | 632.44      | 46.00318     | YES             | YES   |
| 48                   |      | a        | 686.38      | 24.12826     | YES             | YES   |
| 49                   |      | a        | 713.06      | 14.21208     | YES             | YES   |
| 50                   |      | a        | 734.13      | 29.57312     | YES             | YES   |

**B-F<sub>4</sub>**

|                                            |                                                               |
|--------------------------------------------|---------------------------------------------------------------|
| SCF Energy (au) BP86/SV(P)                 | -1312.042640290                                               |
| SCF Energy (au) PBE0/def2-TZVPP            | -1311.969507684                                               |
| SCF Energy (au) PBE0/def2-TZVPP            | -1311.9831616018 (CH <sub>2</sub> Cl <sub>2</sub> Correction) |
| SCF Energy (au) PBE0/def2-TZVPP            | -1311.9764007975 (C <sub>6</sub> H <sub>6</sub> Correction)   |
| SCF Energy (au) PBE0/def2-TZVPP            | -1311.9755335936 (C <sub>6</sub> H <sub>12</sub> Correction)  |
| Zero Point Energy (au)                     | 0.3402639                                                     |
| Chemical Potential (kJ mol <sup>-1</sup> ) | 747.88                                                        |
| Dispersion Correction (au) PBE0/def2-TZVPP | -0.06553122                                                   |

xyz coordinates

46

|    |            |            |            |
|----|------------|------------|------------|
| Zr | -0.6962389 | -1.1765099 | 0.0701957  |
| H  | -0.3872729 | 3.1004205  | 4.2091172  |
| F  | -2.4201907 | -0.6266791 | 2.4836607  |
| N  | -0.9430245 | 0.6167848  | 1.3000718  |
| C  | -0.5948897 | 2.4331958  | 3.3583513  |
| C  | 0.0645013  | 2.6043696  | 2.1728167  |
| F  | 0.9960265  | 3.5835777  | 2.0775906  |
| C  | -1.6615636 | 0.5159307  | 2.4409239  |
| C  | -1.5501862 | 1.3741433  | 3.5013477  |
| F  | -2.2731399 | 1.2432027  | 4.6356121  |
| C  | 0.7590409  | 1.5656231  | -0.1458564 |
| C  | 0.0597627  | -3.6233339 | 0.3681566  |
| H  | -0.3926620 | -4.4092783 | -0.2514535 |
| C  | 1.5471254  | 2.7570357  | -0.6756402 |
| H  | 1.9571365  | 3.3569517  | 0.1611553  |
| H  | 0.8232852  | 3.4339739  | -1.1900207 |
| C  | -0.2955739 | 1.8378489  | 0.9279657  |
| C  | 1.2408672  | -2.8884999 | 0.0566466  |
| H  | 1.8563709  | -3.0065947 | -0.8463523 |
| C  | 0.8271778  | 0.3164804  | -0.6981417 |
| C  | 1.5025350  | -1.9875985 | 1.1368735  |
| H  | 2.3465272  | -1.2900214 | 1.2068641  |
| C  | -3.1299273 | -1.2462397 | -0.7431314 |
| H  | -3.9196636 | -1.2546149 | 0.0220514  |
| C  | -0.4299204 | -3.1599696 | 1.6268292  |
| H  | -1.3241180 | -3.5286570 | 2.1497296  |
| C  | 1.8026930  | 0.0187809  | -1.8279687 |
| H  | 1.3750463  | -0.7353577 | -2.5305825 |
| H  | 2.7080687  | -0.4789329 | -1.3980391 |
| C  | -1.5009190 | -1.9399086 | -2.2271365 |
| H  | -0.8514276 | -2.5786944 | -2.8426651 |
| C  | 2.6838667  | 2.3641535  | -1.6332144 |
| H  | 3.0402592  | 3.2655218  | -2.1802767 |
| H  | 3.5538221  | 1.9901062  | -1.0432597 |
| C  | 0.4715057  | -2.1533634 | 2.1059112  |
| H  | 0.3855226  | -1.6071673 | 3.0554230  |
| C  | -2.4881886 | -2.3945825 | -1.2961665 |
| H  | -2.7277735 | -3.4407328 | -1.0618760 |
| C  | -2.5461445 | -0.0823326 | -1.3288561 |
| H  | -2.7835398 | 0.9606049  | -1.0822472 |
| C  | 2.2418420  | 1.2699172  | -2.6101232 |
| H  | 3.0598731  | 1.0130639  | -3.3211329 |
| H  | 1.3882063  | 1.6430576  | -3.2245024 |
| C  | -1.5464753 | -0.5101967 | -2.2521775 |
| H  | -0.9364907 | 0.1482816  | -2.8827228 |
| F  | -1.2917320 | 2.7062396  | 0.2262495  |

| vibrational spectrum |      |          |             |              |                 |       |
|----------------------|------|----------|-------------|--------------|-----------------|-------|
| #                    | mode | symmetry | wave number | IR intensity | selection rules |       |
| #                    |      |          | cm**(-1)    | km/mol       | IR              | RAMAN |
| 1                    |      |          | -0.00       | 0.00000      | -               | -     |
| 2                    |      |          | 0.00        | 0.00000      | -               | -     |
| 3                    |      |          | 0.00        | 0.00000      | -               | -     |
| 4                    |      |          | 0.00        | 0.00000      | -               | -     |
| 5                    |      |          | 0.00        | 0.00000      | -               | -     |
| 6                    |      |          | 0.00        | 0.00000      | -               | -     |
| 7                    |      | a        | 23.76       | 0.23095      | YES             | YES   |
| 8                    |      | a        | 31.65       | 0.01622      | YES             | YES   |
| 9                    |      | a        | 35.96       | 0.06220      | YES             | YES   |
| 10                   |      | a        | 44.92       | 0.07951      | YES             | YES   |
| 11                   |      | a        | 56.87       | 0.31223      | YES             | YES   |
| 12                   |      | a        | 72.22       | 0.19602      | YES             | YES   |
| 13                   |      | a        | 91.95       | 0.10882      | YES             | YES   |
| 14                   |      | a        | 98.03       | 1.18041      | YES             | YES   |
| 15                   |      | a        | 110.11      | 1.55805      | YES             | YES   |
| 16                   |      | a        | 122.66      | 1.20053      | YES             | YES   |
| 17                   |      | a        | 146.29      | 0.77345      | YES             | YES   |
| 18                   |      | a        | 163.10      | 0.70390      | YES             | YES   |
| 19                   |      | a        | 176.26      | 3.52452      | YES             | YES   |
| 20                   |      | a        | 191.86      | 10.07771     | YES             | YES   |
| 21                   |      | a        | 198.15      | 4.83818      | YES             | YES   |
| 22                   |      | a        | 224.79      | 1.26801      | YES             | YES   |
| 23                   |      | a        | 236.88      | 1.99060      | YES             | YES   |
| 24                   |      | a        | 246.57      | 2.61367      | YES             | YES   |
| 25                   |      | a        | 248.75      | 8.79839      | YES             | YES   |
| 26                   |      | a        | 254.46      | 0.32998      | YES             | YES   |
| 27                   |      | a        | 266.00      | 0.88792      | YES             | YES   |
| 28                   |      | a        | 272.61      | 1.28015      | YES             | YES   |
| 29                   |      | a        | 274.48      | 4.39864      | YES             | YES   |
| 30                   |      | a        | 300.24      | 9.02368      | YES             | YES   |
| 31                   |      | a        | 316.45      | 0.78776      | YES             | YES   |
| 32                   |      | a        | 327.67      | 10.93087     | YES             | YES   |
| 33                   |      | a        | 336.07      | 15.72454     | YES             | YES   |
| 34                   |      | a        | 364.44      | 5.71205      | YES             | YES   |
| 35                   |      | a        | 383.51      | 6.65346      | YES             | YES   |
| 36                   |      | a        | 401.42      | 0.58052      | YES             | YES   |
| 37                   |      | a        | 446.69      | 1.24157      | YES             | YES   |
| 38                   |      | a        | 476.18      | 5.23078      | YES             | YES   |
| 39                   |      | a        | 477.74      | 3.39617      | YES             | YES   |
| 40                   |      | a        | 490.51      | 3.62103      | YES             | YES   |
| 41                   |      | a        | 541.10      | 22.75002     | YES             | YES   |
| 42                   |      | a        | 567.92      | 27.10748     | YES             | YES   |
| 43                   |      | a        | 588.96      | 0.46654      | YES             | YES   |
| 44                   |      | a        | 593.69      | 14.76767     | YES             | YES   |
| 45                   |      | a        | 594.86      | 8.47400      | YES             | YES   |
| 46                   |      | a        | 596.31      | 4.59263      | YES             | YES   |
| 47                   |      | a        | 598.78      | 0.25135      | YES             | YES   |
| 48                   |      | a        | 600.06      | 10.47699     | YES             | YES   |
| 49                   |      | a        | 655.88      | 3.56989      | YES             | YES   |
| 50                   |      | a        | 716.35      | 64.05144     | YES             | YES   |

**B-F<sub>5</sub>**

|                                            |                                                               |
|--------------------------------------------|---------------------------------------------------------------|
| SCF Energy (au) BP86/SV(P)                 | -1411.200002083                                               |
| SCF Energy (au) PBE0/def2-TZVPP            | -1411.150408616                                               |
| SCF Energy (au) PBE0/def2-TZVPP            | -1411.1638207327 (CH <sub>2</sub> Cl <sub>2</sub> Correction) |
| SCF Energy (au) PBE0/def2-TZVPP            | -1411.1571597434 (C <sub>6</sub> H <sub>6</sub> Correction)   |
| SCF Energy (au) PBE0/def2-TZVPP            | -1411.1563083108 (C <sub>6</sub> H <sub>12</sub> Correction)  |
| Zero Point Energy (au)                     | 0.3325507                                                     |
| Chemical Potential (kJ mol <sup>-1</sup> ) | 724.02                                                        |
| Dispersion Correction (au) PBE0/def2-TZVPP | -0.06575765                                                   |

xyz coordinates

46

|    |            |            |            |
|----|------------|------------|------------|
| Zr | -0.6920019 | -1.1829691 | 0.0606765  |
| F  | -0.3530430 | 3.2248974  | 4.3936539  |
| F  | -2.4342070 | -0.6155301 | 2.4917241  |
| N  | -0.9449040 | 0.6085610  | 1.3011741  |
| C  | -0.5908500 | 2.4288521  | 3.3413796  |
| C  | 0.0910231  | 2.5934576  | 2.1621437  |
| F  | 1.0197111  | 3.5744161  | 2.0885178  |
| C  | -1.6621576 | 0.5137611  | 2.4394515  |
| C  | -1.5568737 | 1.3722517  | 3.5011532  |
| F  | -2.2872834 | 1.2746450  | 4.6277371  |
| C  | 0.7564158  | 1.5612431  | -0.1489968 |
| C  | 0.0554611  | -3.6285912 | 0.3649649  |
| H  | -0.3988725 | -4.4151037 | -0.2524665 |
| C  | 1.5395470  | 2.7555492  | -0.6796845 |
| H  | 1.9473522  | 3.3582198  | 0.1561842  |
| H  | 0.8126153  | 3.4286088  | -1.1947646 |
| C  | -0.2951105 | 1.8333498  | 0.9279263  |
| C  | 1.2384219  | -2.8972943 | 0.0512270  |
| H  | 1.8531909  | -3.0191941 | -0.8518039 |
| C  | 0.8276143  | 0.3122642  | -0.7011688 |
| C  | 1.5032809  | -1.9951063 | 1.1295032  |
| H  | 2.3495193  | -1.3001627 | 1.1984727  |
| C  | -3.1276150 | -1.2487387 | -0.7479063 |
| H  | -3.9172273 | -1.2557443 | 0.0174745  |
| C  | -0.4317427 | -3.1621062 | 1.6234009  |
| H  | -1.3260800 | -3.5283594 | 2.1478386  |
| C  | 1.8044077  | 0.0177010  | -1.8309331 |
| H  | 1.3797525  | -0.7382739 | -2.5333128 |
| H  | 2.7111162  | -0.4765406 | -1.3999543 |
| C  | -1.5012990 | -1.9454348 | -2.2334120 |
| H  | -0.8537990 | -2.5856197 | -2.8496057 |
| C  | 2.6776231  | 2.3663515  | -1.6371244 |
| H  | 3.0303118  | 3.2688117  | -2.1845963 |
| H  | 3.5489882  | 1.9961410  | -1.0469743 |
| C  | 0.4723425  | -2.1566281 | 2.0996202  |
| H  | 0.3901219  | -1.6101791 | 3.0493320  |
| C  | -2.4880975 | -2.3982914 | -1.3008778 |
| H  | -2.7290318 | -3.4440269 | -1.0662076 |
| C  | -2.5432519 | -0.0860179 | -1.3355319 |
| H  | -2.7794126 | 0.9574727  | -1.0898852 |
| C  | 2.2394972  | 1.2700397  | -2.6134075 |
| H  | 3.0586066  | 1.0152498  | -3.3238092 |
| H  | 1.3849460  | 1.6398138  | -3.2285219 |
| C  | -1.5455445 | -0.5157047 | -2.2600094 |
| H  | -0.9356401 | 0.1414258  | -2.8920618 |
| F  | -1.2978216 | 2.6925334  | 0.2294605  |

vibrational spectrum

| # | mode | symmetry | wave number | IR intensity | selection rules |
|---|------|----------|-------------|--------------|-----------------|
| # |      |          | cm** (-1)   | km/mol       | IR RAMAN        |

|    |   |        |          |     |     |
|----|---|--------|----------|-----|-----|
| 1  |   | -0.00  | 0.00000  | -   | -   |
| 2  |   | -0.00  | 0.00000  | -   | -   |
| 3  |   | -0.00  | 0.00000  | -   | -   |
| 4  |   | -0.00  | 0.00000  | -   | -   |
| 5  |   | 0.00   | 0.00000  | -   | -   |
| 6  |   | 0.00   | 0.00000  | -   | -   |
| 7  | a | 21.00  | 0.22653  | YES | YES |
| 8  | a | 30.72  | 0.01230  | YES | YES |
| 9  | a | 35.39  | 0.06358  | YES | YES |
| 10 | a | 43.76  | 0.12144  | YES | YES |
| 11 | a | 55.84  | 0.30394  | YES | YES |
| 12 | a | 70.77  | 0.16560  | YES | YES |
| 13 | a | 90.11  | 0.14989  | YES | YES |
| 14 | a | 97.53  | 0.75049  | YES | YES |
| 15 | a | 110.33 | 0.94250  | YES | YES |
| 16 | a | 112.39 | 1.21416  | YES | YES |
| 17 | a | 141.77 | 1.05711  | YES | YES |
| 18 | a | 148.45 | 0.38972  | YES | YES |
| 19 | a | 158.02 | 1.39513  | YES | YES |
| 20 | a | 176.86 | 4.47414  | YES | YES |
| 21 | a | 190.12 | 10.21309 | YES | YES |
| 22 | a | 204.08 | 3.41576  | YES | YES |
| 23 | a | 219.35 | 1.49793  | YES | YES |
| 24 | a | 237.54 | 2.21858  | YES | YES |
| 25 | a | 248.72 | 9.87829  | YES | YES |
| 26 | a | 249.52 | 0.76230  | YES | YES |
| 27 | a | 253.96 | 0.42329  | YES | YES |
| 28 | a | 257.35 | 0.68357  | YES | YES |
| 29 | a | 268.77 | 2.59403  | YES | YES |
| 30 | a | 283.01 | 3.82779  | YES | YES |
| 31 | a | 297.93 | 0.02769  | YES | YES |
| 32 | a | 301.11 | 7.22404  | YES | YES |
| 33 | a | 317.90 | 0.64136  | YES | YES |
| 34 | a | 328.84 | 13.02809 | YES | YES |
| 35 | a | 337.38 | 14.32548 | YES | YES |
| 36 | a | 352.60 | 3.74700  | YES | YES |
| 37 | a | 389.66 | 4.68996  | YES | YES |
| 38 | a | 416.18 | 0.89980  | YES | YES |
| 39 | a | 442.95 | 5.72994  | YES | YES |
| 40 | a | 471.07 | 5.21866  | YES | YES |
| 41 | a | 482.00 | 5.52119  | YES | YES |
| 42 | a | 502.68 | 15.84751 | YES | YES |
| 43 | a | 518.94 | 12.47929 | YES | YES |
| 44 | a | 564.91 | 9.53422  | YES | YES |
| 45 | a | 584.22 | 13.21433 | YES | YES |
| 46 | a | 589.05 | 1.22786  | YES | YES |
| 47 | a | 594.27 | 0.46081  | YES | YES |
| 48 | a | 597.43 | 0.11793  | YES | YES |
| 49 | a | 598.57 | 0.34557  | YES | YES |
| 50 | a | 610.15 | 13.37784 | YES | YES |



**C-F1**

|                                            |                                                               |
|--------------------------------------------|---------------------------------------------------------------|
| SCF Energy (au) BP86/SV(P)                 | -1014.624567931                                               |
| SCF Energy (au) PBE0/def2-TZVPP            | -1014.483718428                                               |
| SCF Energy (au) PBE0/def2-TZVPP            | -1014.4972651946 (CH <sub>2</sub> Cl <sub>2</sub> Correction) |
| SCF Energy (au) PBE0/def2-TZVPP            | -1014.4905623632 (C <sub>6</sub> H <sub>6</sub> Correction)   |
| SCF Energy (au) PBE0/def2-TZVPP            | -1014.4897019168 (C <sub>6</sub> H <sub>12</sub> Correction)  |
| Zero Point Energy (au)                     | 0.3651223                                                     |
| Chemical Potential (kJ mol <sup>-1</sup> ) | 823.78                                                        |
| Dispersion Correction (au) PBE0/def2-TZVPP | -0.06400448                                                   |

xyz coordinates

46

|    |            |            |            |
|----|------------|------------|------------|
| Zr | -0.2485412 | -1.3377647 | -0.5771007 |
| F  | 0.9345420  | -1.7667909 | -2.1411965 |
| H  | -1.8672538 | 2.9931087  | 3.8528596  |
| H  | -2.3925079 | -0.9169995 | 2.0395760  |
| N  | -0.9189233 | 0.2859553  | 1.1991978  |
| C  | -1.6006864 | 2.2241656  | 3.1086709  |
| C  | -0.5868272 | 2.4653414  | 2.1792102  |
| H  | -0.0528412 | 3.4260722  | 2.1841599  |
| C  | -1.8903071 | 0.0627362  | 2.1040016  |
| C  | -2.2731185 | 0.9884471  | 3.0812204  |
| H  | -3.0761390 | 0.7443879  | 3.7933689  |
| C  | 0.8083717  | 1.6546060  | 0.2112438  |
| C  | -0.4557737 | -2.9754733 | 1.4347704  |
| H  | -1.4248221 | -3.1125428 | 1.9342573  |
| C  | 1.6182384  | 2.9483107  | 0.2439057  |
| H  | 1.9233549  | 3.1827952  | 1.2907703  |
| H  | 0.9737204  | 3.8052092  | -0.0752544 |
| C  | -0.2410944 | 1.4757281  | 1.2167499  |
| C  | 0.0362847  | -3.7528637 | 0.3329900  |
| H  | -0.5020134 | -4.5630470 | -0.1778477 |
| C  | 0.9870105  | 0.6458776  | -0.7093957 |
| C  | 1.3566905  | -3.3180239 | 0.0440469  |
| H  | 1.9856446  | -3.6808826 | -0.7781417 |
| C  | -2.5866198 | -0.2319189 | -1.0652755 |
| H  | -2.9027433 | 0.6443095  | -0.4864378 |
| C  | 0.5725969  | -2.0680844 | 1.8169600  |
| H  | 0.5309140  | -1.3508492 | 2.6456138  |
| C  | 2.0175474  | 0.8190028  | -1.8049066 |
| H  | 1.6151257  | 0.4094352  | -2.7572670 |
| H  | 2.8724251  | 0.1353022  | -1.5752433 |
| C  | -2.2786820 | -2.4041160 | -1.7828892 |
| H  | -2.3232376 | -3.5000895 | -1.8451266 |
| C  | 2.8703715  | 2.8881182  | -0.6453149 |
| H  | 3.2977628  | 3.9085593  | -0.7672826 |
| H  | 3.6534768  | 2.2738553  | -0.1411368 |
| C  | 1.6807226  | -2.2509695 | 0.9331785  |
| H  | 2.6284907  | -1.6973178 | 0.9636708  |
| C  | -2.8300071 | -1.5945663 | -0.7334131 |
| H  | -3.3983416 | -1.9651466 | 0.1307959  |
| C  | -1.8554916 | -0.1949195 | -2.2929650 |
| H  | -1.5117414 | 0.7096233  | -2.8118731 |
| C  | 2.5347062  | 2.2550450  | -1.9995552 |
| H  | 3.4233485  | 2.2562032  | -2.6707251 |
| H  | 1.7531757  | 2.8687803  | -2.5079516 |
| C  | -1.7019305 | -1.5371922 | -2.7487787 |
| H  | -1.1548775 | -1.8514171 | -3.6461400 |

| vibrational spectrum |      |          |             |              | selection rules |       |
|----------------------|------|----------|-------------|--------------|-----------------|-------|
| #                    | mode | symmetry | wave number | IR intensity | IR              | RAMAN |
| #                    |      |          | cm**(-1)    | km/mol       |                 |       |
| 1                    |      |          | -0.00       | 0.00000      | -               | -     |
| 2                    |      |          | -0.00       | 0.00000      | -               | -     |
| 3                    |      |          | 0.00        | 0.00000      | -               | -     |
| 4                    |      |          | 0.00        | 0.00000      | -               | -     |
| 5                    |      |          | 0.00        | 0.00000      | -               | -     |
| 6                    |      |          | 0.00        | 0.00000      | -               | -     |
| 7                    |      | a        | 31.73       | 0.25192      | YES             | YES   |
| 8                    |      | a        | 38.64       | 0.26942      | YES             | YES   |
| 9                    |      | a        | 42.85       | 0.09980      | YES             | YES   |
| 10                   |      | a        | 47.94       | 0.02432      | YES             | YES   |
| 11                   |      | a        | 84.95       | 0.65565      | YES             | YES   |
| 12                   |      | a        | 91.73       | 0.68976      | YES             | YES   |
| 13                   |      | a        | 97.89       | 0.48804      | YES             | YES   |
| 14                   |      | a        | 128.88      | 0.48852      | YES             | YES   |
| 15                   |      | a        | 147.38      | 0.47265      | YES             | YES   |
| 16                   |      | a        | 153.26      | 0.61195      | YES             | YES   |
| 17                   |      | a        | 186.66      | 0.10790      | YES             | YES   |
| 18                   |      | a        | 191.04      | 0.28797      | YES             | YES   |
| 19                   |      | a        | 210.40      | 1.35989      | YES             | YES   |
| 20                   |      | a        | 212.51      | 3.66170      | YES             | YES   |
| 21                   |      | a        | 227.28      | 1.43651      | YES             | YES   |
| 22                   |      | a        | 233.61      | 3.80134      | YES             | YES   |
| 23                   |      | a        | 236.57      | 5.29216      | YES             | YES   |
| 24                   |      | a        | 256.84      | 0.10764      | YES             | YES   |
| 25                   |      | a        | 263.47      | 0.06304      | YES             | YES   |
| 26                   |      | a        | 272.27      | 7.80064      | YES             | YES   |
| 27                   |      | a        | 288.27      | 13.23472     | YES             | YES   |
| 28                   |      | a        | 297.40      | 4.44437      | YES             | YES   |
| 29                   |      | a        | 325.18      | 30.07247     | YES             | YES   |
| 30                   |      | a        | 338.93      | 0.95951      | YES             | YES   |
| 31                   |      | a        | 428.22      | 1.71203      | YES             | YES   |
| 32                   |      | a        | 442.70      | 1.06964      | YES             | YES   |
| 33                   |      | a        | 450.28      | 1.19373      | YES             | YES   |
| 34                   |      | a        | 479.21      | 3.10117      | YES             | YES   |
| 35                   |      | a        | 526.60      | 14.43068     | YES             | YES   |
| 36                   |      | a        | 529.17      | 41.20877     | YES             | YES   |
| 37                   |      | a        | 566.29      | 2.79945      | YES             | YES   |
| 38                   |      | a        | 590.95      | 0.45058      | YES             | YES   |
| 39                   |      | a        | 596.88      | 0.74469      | YES             | YES   |
| 40                   |      | a        | 597.56      | 2.94642      | YES             | YES   |
| 41                   |      | a        | 601.07      | 2.55519      | YES             | YES   |
| 42                   |      | a        | 627.23      | 2.51025      | YES             | YES   |
| 43                   |      | a        | 669.45      | 3.11864      | YES             | YES   |
| 44                   |      | a        | 738.46      | 31.31122     | YES             | YES   |
| 45                   |      | a        | 762.36      | 8.26769      | YES             | YES   |
| 46                   |      | a        | 776.03      | 70.09864     | YES             | YES   |
| 47                   |      | a        | 780.35      | 28.75106     | YES             | YES   |
| 48                   |      | a        | 783.36      | 108.17229    | YES             | YES   |
| 49                   |      | a        | 785.46      | 10.42729     | YES             | YES   |
| 50                   |      | a        | 787.96      | 59.85534     | YES             | YES   |

**C-F2**

|                                            |                                                               |
|--------------------------------------------|---------------------------------------------------------------|
| SCF Energy (au) BP86/SV(P)                 | -1113.799782527                                               |
| SCF Energy (au) PBE0/def2-TZVPP            | -1113.681271205                                               |
| SCF Energy (au) PBE0/def2-TZVPP            | -1113.6939685217 (CH <sub>2</sub> Cl <sub>2</sub> Correction) |
| SCF Energy (au) PBE0/def2-TZVPP            | -1113.6877236568 (C <sub>6</sub> H <sub>6</sub> Correction)   |
| SCF Energy (au) PBE0/def2-TZVPP            | -1113.6869164224 (C <sub>6</sub> H <sub>12</sub> Correction)  |
| Zero Point Energy (au)                     | 0.3571624                                                     |
| Chemical Potential (kJ mol <sup>-1</sup> ) | 799.93                                                        |
| Dispersion Correction (au) PBE0/def2-TZVPP | -0.06404460                                                   |

xyz coordinates

46

|    |            |            |            |
|----|------------|------------|------------|
| Zr | -0.2808389 | -1.3561181 | -0.5492469 |
| F  | 0.9008976  | -1.8102840 | -2.1034492 |
| H  | -1.7369761 | 3.1547058  | 3.8492730  |
| F  | -2.5586246 | -0.9473283 | 2.1428195  |
| N  | -0.9294205 | 0.3524382  | 1.2430183  |
| C  | -1.5089653 | 2.3618915  | 3.1178357  |
| C  | -0.4972164 | 2.5436512  | 2.1703488  |
| H  | 0.0722284  | 3.4822718  | 2.1491809  |
| C  | -1.8800634 | 0.2165101  | 2.1619366  |
| C  | -2.2347367 | 1.1604288  | 3.1315742  |
| H  | -3.0418386 | 0.9452981  | 3.8460419  |
| C  | 0.8295599  | 1.6488028  | 0.2011913  |
| C  | -0.5094698 | -3.1406870 | 1.3259266  |
| H  | -1.5101803 | -3.3972101 | 1.6964513  |
| C  | 1.6734820  | 2.9219875  | 0.2006213  |
| H  | 2.0135355  | 3.1541761  | 1.2370143  |
| H  | 1.0413087  | 3.7921868  | -0.1059548 |
| C  | -0.2049462 | 1.5228793  | 1.2257692  |
| C  | 0.1827630  | -3.7795213 | 0.2431221  |
| H  | -0.2048141 | -4.5957818 | -0.3821575 |
| C  | 0.9648507  | 0.6233395  | -0.7092736 |
| C  | 1.4707120  | -3.1901489 | 0.1362643  |
| H  | 2.2201811  | -3.4260691 | -0.6291689 |
| C  | -2.6923078 | -0.3848303 | -0.9409658 |
| H  | -3.1089335 | 0.3714124  | -0.2657179 |
| C  | 0.3592392  | -2.1575480 | 1.8727546  |
| H  | 0.1541358  | -1.5230415 | 2.7428498  |
| C  | 1.9740134  | 0.7638988  | -1.8293816 |
| H  | 1.5446391  | 0.3476076  | -2.7666980 |
| H  | 2.8205559  | 0.0676077  | -1.6074889 |
| C  | -2.1873694 | -2.3982395 | -1.9452585 |
| H  | -2.1250170 | -3.4749326 | -2.1556822 |
| C  | 2.8989981  | 2.8271584  | -0.7214914 |
| H  | 3.3420722  | 3.8377900  | -0.8662382 |
| H  | 3.6837941  | 2.2026666  | -0.2327600 |
| C  | 1.5728900  | -2.1562384 | 1.1115080  |
| H  | 2.4468894  | -1.5157535 | 1.2899118  |
| C  | -2.8253612 | -1.7934489 | -0.8104237 |
| H  | -3.3609525 | -2.3212550 | -0.0110977 |
| C  | -1.9447796 | -0.1118076 | -2.1322336 |
| H  | -1.6823204 | 0.8830343  | -2.5158249 |
| C  | 2.5128025  | 2.1864069  | -2.0578728 |
| H  | 3.3815607  | 2.1611106  | -2.7541048 |
| H  | 1.7287996  | 2.8088157  | -2.5517501 |
| C  | -1.6754639 | -1.3586607 | -2.7673145 |
| H  | -1.0893127 | -1.4991719 | -3.6838581 |

| vibrational spectrum |      |          |             |              |                 |       |
|----------------------|------|----------|-------------|--------------|-----------------|-------|
| #                    | mode | symmetry | wave number | IR intensity | selection rules |       |
| #                    |      |          | cm**(-1)    | km/mol       | IR              | RAMAN |
| 1                    |      |          | -0.00       | 0.00000      | -               | -     |
| 2                    |      |          | -0.00       | 0.00000      | -               | -     |
| 3                    |      |          | -0.00       | 0.00000      | -               | -     |
| 4                    |      |          | -0.00       | 0.00000      | -               | -     |
| 5                    |      |          | 0.00        | 0.00000      | -               | -     |
| 6                    |      |          | 0.00        | 0.00000      | -               | -     |
| 7                    |      | a        | 30.50       | 0.06886      | YES             | YES   |
| 8                    |      | a        | 36.56       | 0.02915      | YES             | YES   |
| 9                    |      | a        | 41.46       | 0.07568      | YES             | YES   |
| 10                   |      | a        | 46.36       | 0.62555      | YES             | YES   |
| 11                   |      | a        | 81.98       | 0.94198      | YES             | YES   |
| 12                   |      | a        | 87.84       | 0.94919      | YES             | YES   |
| 13                   |      | a        | 95.15       | 0.71241      | YES             | YES   |
| 14                   |      | a        | 111.70      | 1.64843      | YES             | YES   |
| 15                   |      | a        | 132.76      | 0.07731      | YES             | YES   |
| 16                   |      | a        | 143.99      | 0.29623      | YES             | YES   |
| 17                   |      | a        | 179.48      | 0.07109      | YES             | YES   |
| 18                   |      | a        | 186.89      | 0.33102      | YES             | YES   |
| 19                   |      | a        | 202.35      | 0.28844      | YES             | YES   |
| 20                   |      | a        | 210.93      | 2.11986      | YES             | YES   |
| 21                   |      | a        | 217.36      | 11.28731     | YES             | YES   |
| 22                   |      | a        | 220.86      | 0.86498      | YES             | YES   |
| 23                   |      | a        | 229.27      | 1.43179      | YES             | YES   |
| 24                   |      | a        | 252.69      | 0.04317      | YES             | YES   |
| 25                   |      | a        | 254.03      | 0.18749      | YES             | YES   |
| 26                   |      | a        | 270.45      | 0.90173      | YES             | YES   |
| 27                   |      | a        | 277.22      | 5.38177      | YES             | YES   |
| 28                   |      | a        | 286.27      | 7.99787      | YES             | YES   |
| 29                   |      | a        | 300.71      | 22.80202     | YES             | YES   |
| 30                   |      | a        | 325.75      | 2.98854      | YES             | YES   |
| 31                   |      | a        | 337.39      | 12.90394     | YES             | YES   |
| 32                   |      | a        | 391.37      | 3.51020      | YES             | YES   |
| 33                   |      | a        | 441.99      | 0.62249      | YES             | YES   |
| 34                   |      | a        | 470.94      | 3.28022      | YES             | YES   |
| 35                   |      | a        | 485.14      | 1.38726      | YES             | YES   |
| 36                   |      | a        | 495.24      | 2.10801      | YES             | YES   |
| 37                   |      | a        | 528.93      | 52.04467     | YES             | YES   |
| 38                   |      | a        | 540.04      | 0.94142      | YES             | YES   |
| 39                   |      | a        | 562.35      | 0.90092      | YES             | YES   |
| 40                   |      | a        | 590.51      | 0.00810      | YES             | YES   |
| 41                   |      | a        | 596.18      | 0.77323      | YES             | YES   |
| 42                   |      | a        | 597.82      | 2.25931      | YES             | YES   |
| 43                   |      | a        | 601.25      | 2.41503      | YES             | YES   |
| 44                   |      | a        | 646.56      | 4.05061      | YES             | YES   |
| 45                   |      | a        | 655.67      | 0.66318      | YES             | YES   |
| 46                   |      | a        | 728.11      | 13.61497     | YES             | YES   |
| 47                   |      | a        | 745.42      | 10.59866     | YES             | YES   |
| 48                   |      | a        | 777.85      | 12.23189     | YES             | YES   |
| 49                   |      | a        | 782.00      | 192.92097    | YES             | YES   |
| 50                   |      | a        | 785.64      | 13.21535     | YES             | YES   |

**C-F<sub>3</sub>**

|                                            |                                                               |
|--------------------------------------------|---------------------------------------------------------------|
| SCF Energy (au) BP86/SV(P)                 | -1212.970134290                                               |
| SCF Energy (au) PBE0/def2-TZVPP            | -1212.874791258                                               |
| SCF Energy (au) PBE0/def2-TZVPP            | -1212.8868982252 (CH <sub>2</sub> Cl <sub>2</sub> Correction) |
| SCF Energy (au) PBE0/def2-TZVPP            | -1212.8809726815 (C <sub>6</sub> H <sub>6</sub> Correction)   |
| SCF Energy (au) PBE0/def2-TZVPP            | -1212.8802024829 (C <sub>6</sub> H <sub>12</sub> Correction)  |
| Zero Point Energy (au)                     | 0.3492332                                                     |
| Chemical Potential (kJ mol <sup>-1</sup> ) | 775.97                                                        |
| Dispersion Correction (au) PBE0/def2-TZVPP | -0.06423972                                                   |

xyz coordinates

46

|    |            |            |            |
|----|------------|------------|------------|
| Zr | -0.2770061 | -1.3624886 | -0.5553411 |
| F  | 0.8931106  | -1.8053803 | -2.1202324 |
| F  | -1.8129879 | 3.3180847  | 3.9613971  |
| F  | -2.5293507 | -0.9678060 | 2.1686135  |
| N  | -0.9173642 | 0.3379090  | 1.2474357  |
| C  | -1.5179616 | 2.3498139  | 3.0847966  |
| C  | -0.5031811 | 2.5480846  | 2.1490883  |
| H  | 0.0419680  | 3.5002272  | 2.1395642  |
| C  | -1.8659514 | 0.2022701  | 2.1681475  |
| C  | -2.2395859 | 1.1493388  | 3.1268778  |
| H  | -3.0411507 | 0.9583190  | 3.8524022  |
| C  | 0.8303364  | 1.6461141  | 0.2004726  |
| C  | -0.5011764 | -3.1604628 | 1.3079185  |
| H  | -1.4995254 | -3.4249975 | 1.6796869  |
| C  | 1.6671542  | 2.9232352  | 0.2000780  |
| H  | 1.9995937  | 3.1610314  | 1.2376877  |
| H  | 1.0324983  | 3.7888728  | -0.1142801 |
| C  | -0.2053989 | 1.5169275  | 1.2210489  |
| C  | 0.1900676  | -3.7874328 | 0.2173939  |
| H  | -0.1971828 | -4.5992162 | -0.4137977 |
| C  | 0.9711235  | 0.6180841  | -0.7066879 |
| C  | 1.4767027  | -3.1946501 | 0.1131744  |
| H  | 2.2250651  | -3.4235517 | -0.6554525 |
| C  | -2.6739250 | -0.3607046 | -0.9449158 |
| H  | -3.0695000 | 0.4144635  | -0.2778844 |
| C  | 0.3668908  | -2.1809962 | 1.8617100  |
| H  | 0.1626240  | -1.5553415 | 2.7384181  |
| C  | 1.9831283  | 0.7605293  | -1.8231540 |
| H  | 1.5585491  | 0.3405180  | -2.7608734 |
| H  | 2.8302934  | 0.0662287  | -1.5967746 |
| C  | -2.2116862 | -2.3987030 | -1.9198312 |
| H  | -2.1714759 | -3.4795995 | -2.1134968 |
| C  | 2.8980607  | 2.8290479  | -0.7149302 |
| H  | 3.3397073  | 3.8402117  | -0.8598971 |
| H  | 3.6811402  | 2.2075351  | -0.2199628 |
| C  | 1.5787712  | -2.1694882 | 1.0977546  |
| H  | 2.4523241  | -1.5299920 | 1.2816671  |
| C  | -2.8284808 | -1.7649334 | -0.7890767 |
| H  | -3.3650816 | -2.2709523 | 0.0233699  |
| C  | -1.9333309 | -0.1202806 | -2.1472569 |
| H  | -1.6580292 | 0.8632330  | -2.5504067 |
| C  | 2.5198510  | 2.1838372  | -2.0515447 |
| H  | 3.3916713  | 2.1589898  | -2.7437055 |
| H  | 1.7372561  | 2.8032082  | -2.5510845 |
| C  | -1.6908891 | -1.3817678 | -2.7638396 |
| H  | -1.1176655 | -1.5473699 | -3.6842766 |

| vibrational spectrum |      |          |             |              |                 |       |
|----------------------|------|----------|-------------|--------------|-----------------|-------|
| #                    | mode | symmetry | wave number | IR intensity | selection rules |       |
| #                    |      |          | cm**(-1)    | km/mol       | IR              | RAMAN |
| 1                    |      |          | -0.00       | 0.00000      | -               | -     |
| 2                    |      |          | -0.00       | 0.00000      | -               | -     |
| 3                    |      |          | 0.00        | 0.00000      | -               | -     |
| 4                    |      |          | 0.00        | 0.00000      | -               | -     |
| 5                    |      |          | 0.00        | 0.00000      | -               | -     |
| 6                    |      |          | 0.00        | 0.00000      | -               | -     |
| 7                    |      | a        | 29.05       | 0.24455      | YES             | YES   |
| 8                    |      | a        | 34.61       | 0.00515      | YES             | YES   |
| 9                    |      | a        | 40.86       | 0.07312      | YES             | YES   |
| 10                   |      | a        | 43.97       | 0.40713      | YES             | YES   |
| 11                   |      | a        | 72.89       | 0.16338      | YES             | YES   |
| 12                   |      | a        | 86.36       | 1.05233      | YES             | YES   |
| 13                   |      | a        | 95.16       | 0.89605      | YES             | YES   |
| 14                   |      | a        | 105.67      | 1.26825      | YES             | YES   |
| 15                   |      | a        | 129.64      | 0.30041      | YES             | YES   |
| 16                   |      | a        | 143.72      | 0.28786      | YES             | YES   |
| 17                   |      | a        | 169.64      | 0.38824      | YES             | YES   |
| 18                   |      | a        | 181.79      | 0.10099      | YES             | YES   |
| 19                   |      | a        | 188.03      | 0.49983      | YES             | YES   |
| 20                   |      | a        | 207.34      | 0.80804      | YES             | YES   |
| 21                   |      | a        | 212.48      | 1.51615      | YES             | YES   |
| 22                   |      | a        | 216.47      | 11.36513     | YES             | YES   |
| 23                   |      | a        | 225.03      | 0.87195      | YES             | YES   |
| 24                   |      | a        | 229.54      | 1.53613      | YES             | YES   |
| 25                   |      | a        | 252.05      | 0.05019      | YES             | YES   |
| 26                   |      | a        | 263.01      | 0.47193      | YES             | YES   |
| 27                   |      | a        | 270.41      | 2.86959      | YES             | YES   |
| 28                   |      | a        | 280.16      | 3.82354      | YES             | YES   |
| 29                   |      | a        | 289.69      | 6.34272      | YES             | YES   |
| 30                   |      | a        | 308.94      | 11.65896     | YES             | YES   |
| 31                   |      | a        | 315.17      | 20.57413     | YES             | YES   |
| 32                   |      | a        | 341.06      | 6.34158      | YES             | YES   |
| 33                   |      | a        | 361.89      | 1.27847      | YES             | YES   |
| 34                   |      | a        | 381.78      | 2.72699      | YES             | YES   |
| 35                   |      | a        | 452.77      | 1.50926      | YES             | YES   |
| 36                   |      | a        | 480.01      | 3.19264      | YES             | YES   |
| 37                   |      | a        | 509.81      | 3.56914      | YES             | YES   |
| 38                   |      | a        | 521.60      | 1.90412      | YES             | YES   |
| 39                   |      | a        | 530.63      | 55.11346     | YES             | YES   |
| 40                   |      | a        | 549.21      | 0.63114      | YES             | YES   |
| 41                   |      | a        | 590.33      | 0.01667      | YES             | YES   |
| 42                   |      | a        | 596.05      | 0.75282      | YES             | YES   |
| 43                   |      | a        | 597.62      | 2.30139      | YES             | YES   |
| 44                   |      | a        | 600.29      | 1.29754      | YES             | YES   |
| 45                   |      | a        | 602.14      | 1.31122      | YES             | YES   |
| 46                   |      | a        | 619.22      | 3.46385      | YES             | YES   |
| 47                   |      | a        | 644.24      | 0.10226      | YES             | YES   |
| 48                   |      | a        | 713.01      | 9.39664      | YES             | YES   |
| 49                   |      | a        | 739.23      | 1.59901      | YES             | YES   |
| 50                   |      | a        | 779.13      | 10.67122     | YES             | YES   |

**C-F<sub>4</sub>**

|                                            |                                                               |
|--------------------------------------------|---------------------------------------------------------------|
| SCF Energy (au) BP86/SV(P)                 | -1312.120393689                                               |
| SCF Energy (au) PBE0/def2-TZVPP            | -1312.044561486                                               |
| SCF Energy (au) PBE0/def2-TZVPP            | -1312.0568156621 (CH <sub>2</sub> Cl <sub>2</sub> Correction) |
| SCF Energy (au) PBE0/def2-TZVPP            | -1312.0508218692 (C <sub>6</sub> H <sub>6</sub> Correction)   |
| SCF Energy (au) PBE0/def2-TZVPP            | -1312.0500420769 (C <sub>6</sub> H <sub>12</sub> Correction)  |
| Zero Point Energy (au)                     | 0.3410881                                                     |
| Chemical Potential (kJ mol <sup>-1</sup> ) | 750.83                                                        |
| Dispersion Correction (au) PBE0/def2-TZVPP | -0.06456193                                                   |

xyz coordinates

46

|    |            |            |            |
|----|------------|------------|------------|
| Zr | -0.2739751 | -1.3566203 | -0.5580564 |
| F  | 0.8998575  | -1.8253110 | -2.1074981 |
| H  | -1.8065084 | 3.1280304  | 3.8673614  |
| F  | -2.5495864 | -0.9815699 | 2.1300379  |
| N  | -0.9305198 | 0.3740462  | 1.2575451  |
| C  | -1.5635957 | 2.3404081  | 3.1386739  |
| C  | -0.5610154 | 2.5394283  | 2.1870828  |
| F  | 0.0586066  | 3.7349110  | 2.2082244  |
| C  | -1.8858266 | 0.1844721  | 2.1563724  |
| C  | -2.2495789 | 1.1250164  | 3.1318105  |
| F  | -3.2255690 | 0.8586535  | 4.0093318  |
| C  | 0.8299991  | 1.6683671  | 0.1978521  |
| C  | -0.4886252 | -3.1276532 | 1.3363211  |
| H  | -1.4846240 | -3.3900554 | 1.7153475  |
| C  | 1.7199023  | 2.9147935  | 0.1850249  |
| H  | 2.0691518  | 3.1422855  | 1.2148954  |
| H  | 1.1205069  | 3.8047000  | -0.1214523 |
| C  | -0.2098773 | 1.5443021  | 1.2255151  |
| C  | 0.2035432  | -3.7726056 | 0.2575267  |
| H  | -0.1814361 | -4.5978620 | -0.3575125 |
| C  | 0.9440368  | 0.6344235  | -0.7089616 |
| C  | 1.4876632  | -3.1769025 | 0.1404874  |
| H  | 2.2363862  | -3.4166842 | -0.6244737 |
| C  | -2.6841129 | -0.3797381 | -0.9404358 |
| H  | -3.1040999 | 0.3720097  | -0.2620017 |
| C  | 0.3770640  | -2.1347373 | 1.8711363  |
| H  | 0.1743509  | -1.4970775 | 2.7396553  |
| C  | 1.9404503  | 0.7539408  | -1.8449098 |
| H  | 1.4824732  | 0.3544635  | -2.7761445 |
| H  | 2.7713018  | 0.0336977  | -1.6430359 |
| C  | -2.1815560 | -2.3853124 | -1.9609089 |
| H  | -2.1213496 | -3.4602553 | -2.1807528 |
| C  | 2.9348600  | 2.7741128  | -0.7429150 |
| H  | 3.4140181  | 3.7690515  | -0.8804809 |
| H  | 3.6985569  | 2.1164502  | -0.2639216 |
| C  | 1.5878067  | -2.1333830 | 1.1056550  |
| H  | 2.4593540  | -1.4873554 | 1.2758020  |
| C  | -2.8192901 | -1.7894988 | -0.8214994 |
| H  | -3.3590293 | -2.3236343 | -0.0291010 |
| C  | -1.9362120 | -0.0975568 | -2.1294061 |
| H  | -1.6732575 | 0.9000932  | -2.5051981 |
| C  | 2.5154658  | 2.1596351  | -2.0794648 |
| H  | 3.3722708  | 2.1109899  | -2.7889572 |
| H  | 1.7429801  | 2.8079062  | -2.5578753 |
| C  | -1.6681625 | -1.3393791 | -2.7742815 |
| H  | -1.0827980 | -1.4729961 | -3.6924134 |

| vibrational spectrum |      |          |             |              |                 |       |
|----------------------|------|----------|-------------|--------------|-----------------|-------|
| #                    | mode | symmetry | wave number | IR intensity | selection rules |       |
| #                    |      |          | cm** (-1)   | km/mol       | IR              | RAMAN |
| 1                    |      |          | 0.00        | 0.00000      | -               | -     |
| 2                    |      |          | 0.00        | 0.00000      | -               | -     |
| 3                    |      |          | 0.00        | 0.00000      | -               | -     |
| 4                    |      |          | 0.00        | 0.00000      | -               | -     |
| 5                    |      |          | 0.00        | 0.00000      | -               | -     |
| 6                    |      |          | 0.00        | 0.00000      | -               | -     |
| 7                    |      | a        | 23.29       | 0.09071      | YES             | YES   |
| 8                    |      | a        | 34.06       | 0.00685      | YES             | YES   |
| 9                    |      | a        | 40.46       | 0.10062      | YES             | YES   |
| 10                   |      | a        | 44.18       | 0.40038      | YES             | YES   |
| 11                   |      | a        | 60.53       | 0.01952      | YES             | YES   |
| 12                   |      | a        | 79.85       | 0.92617      | YES             | YES   |
| 13                   |      | a        | 85.59       | 1.04245      | YES             | YES   |
| 14                   |      | a        | 98.16       | 1.08171      | YES             | YES   |
| 15                   |      | a        | 128.35      | 0.67350      | YES             | YES   |
| 16                   |      | a        | 138.41      | 0.03974      | YES             | YES   |
| 17                   |      | a        | 142.54      | 0.32545      | YES             | YES   |
| 18                   |      | a        | 179.06      | 0.70264      | YES             | YES   |
| 19                   |      | a        | 186.97      | 0.44739      | YES             | YES   |
| 20                   |      | a        | 191.96      | 1.58600      | YES             | YES   |
| 21                   |      | a        | 212.63      | 11.66937     | YES             | YES   |
| 22                   |      | a        | 214.39      | 0.52215      | YES             | YES   |
| 23                   |      | a        | 226.81      | 0.28068      | YES             | YES   |
| 24                   |      | a        | 229.71      | 1.65211      | YES             | YES   |
| 25                   |      | a        | 247.99      | 0.09039      | YES             | YES   |
| 26                   |      | a        | 250.21      | 0.39043      | YES             | YES   |
| 27                   |      | a        | 268.23      | 0.66457      | YES             | YES   |
| 28                   |      | a        | 271.46      | 2.60636      | YES             | YES   |
| 29                   |      | a        | 285.04      | 3.85324      | YES             | YES   |
| 30                   |      | a        | 287.34      | 4.71738      | YES             | YES   |
| 31                   |      | a        | 298.47      | 22.11341     | YES             | YES   |
| 32                   |      | a        | 317.84      | 5.96604      | YES             | YES   |
| 33                   |      | a        | 336.07      | 2.06181      | YES             | YES   |
| 34                   |      | a        | 339.75      | 11.75744     | YES             | YES   |
| 35                   |      | a        | 385.76      | 3.47639      | YES             | YES   |
| 36                   |      | a        | 412.15      | 0.03209      | YES             | YES   |
| 37                   |      | a        | 457.86      | 0.14194      | YES             | YES   |
| 38                   |      | a        | 467.05      | 0.78432      | YES             | YES   |
| 39                   |      | a        | 476.88      | 1.85025      | YES             | YES   |
| 40                   |      | a        | 501.79      | 2.62732      | YES             | YES   |
| 41                   |      | a        | 533.80      | 51.67195     | YES             | YES   |
| 42                   |      | a        | 535.14      | 4.59504      | YES             | YES   |
| 43                   |      | a        | 589.47      | 7.19411      | YES             | YES   |
| 44                   |      | a        | 591.31      | 15.06449     | YES             | YES   |
| 45                   |      | a        | 595.34      | 0.18381      | YES             | YES   |
| 46                   |      | a        | 597.33      | 1.58425      | YES             | YES   |
| 47                   |      | a        | 600.73      | 3.54997      | YES             | YES   |
| 48                   |      | a        | 649.26      | 2.50917      | YES             | YES   |
| 49                   |      | a        | 650.11      | 1.93910      | YES             | YES   |
| 50                   |      | a        | 707.03      | 8.09318      | YES             | YES   |



**C-F<sub>5</sub>**

|                                            |                                                               |
|--------------------------------------------|---------------------------------------------------------------|
| SCF Energy (au) BP86/SV(P)                 | -1411.277222419                                               |
| SCF Energy (au) PBE0/def2-TZVPP            | -1411.224747450                                               |
| SCF Energy (au) PBE0/def2-TZVPP            | -1411.2360606990 (CH <sub>2</sub> Cl <sub>2</sub> Correction) |
| SCF Energy (au) PBE0/def2-TZVPP            | -1411.2305455972 (C <sub>6</sub> H <sub>6</sub> Correction)   |
| SCF Energy (au) PBE0/def2-TZVPP            | -1411.2298253809 (C <sub>6</sub> H <sub>12</sub> Correction)  |
| Zero Point Energy (au)                     | 0.3332158                                                     |
| Chemical Potential (kJ mol <sup>-1</sup> ) | 727.00                                                        |
| Dispersion Correction (au) PBE0/def2-TZVPP | -0.06479271                                                   |

xyz coordinates

46

|    |            |            |            |
|----|------------|------------|------------|
| Zr | -0.2733425 | -1.3589029 | -0.5648616 |
| F  | 0.8946406  | -1.8192570 | -2.1200036 |
| F  | -1.8729957 | 3.2847602  | 3.9950908  |
| F  | -2.5336646 | -0.9892612 | 2.1339999  |
| N  | -0.9230815 | 0.3681790  | 1.2505438  |
| C  | -1.5673025 | 2.3344465  | 3.1159234  |
| C  | -0.5573186 | 2.5473967  | 2.1642725  |
| F  | 0.0389107  | 3.7501537  | 2.1977076  |
| C  | -1.8763669 | 0.1795694  | 2.1508904  |
| C  | -2.2562172 | 1.1122044  | 3.1258018  |
| F  | -3.2260010 | 0.8609037  | 4.0091337  |
| C  | 0.8328153  | 1.6691244  | 0.1915063  |
| C  | -0.4870337 | -3.1292985 | 1.3313386  |
| H  | -1.4815570 | -3.3924709 | 1.7139317  |
| C  | 1.7247347  | 2.9136436  | 0.1840737  |
| H  | 2.0669755  | 3.1415878  | 1.2165603  |
| H  | 1.1301361  | 3.8044119  | -0.1292964 |
| C  | -0.2089442 | 1.5438938  | 1.2163808  |
| C  | 0.2003645  | -3.7722884 | 0.2482575  |
| H  | -0.1884656 | -4.5958385 | -0.3667517 |
| C  | 0.9458025  | 0.6353636  | -0.7154714 |
| C  | 1.4854100  | -3.1786344 | 0.1289264  |
| H  | 2.2320280  | -3.4193998 | -0.6377574 |
| C  | -2.6890291 | -0.3910217 | -0.9342156 |
| H  | -3.1073449 | 0.3592087  | -0.2528321 |
| C  | 0.3818409  | -2.1393331 | 1.8657569  |
| H  | 0.1829532  | -1.5031051 | 2.7364528  |
| C  | 1.9435761  | 0.7563106  | -1.8497788 |
| H  | 1.4824123  | 0.3658797  | -2.7833343 |
| H  | 2.7680142  | 0.0275558  | -1.6532139 |
| C  | -2.1826381 | -2.3945296 | -1.9563751 |
| H  | -2.1172938 | -3.4692874 | -2.1754895 |
| C  | 2.9457344  | 2.7670730  | -0.7351919 |
| H  | 3.4326472  | 3.7589367  | -0.8672746 |
| H  | 3.7013218  | 2.1031957  | -0.2521493 |
| C  | 1.5901341  | -2.1378020 | 1.0967066  |
| H  | 2.4633612  | -1.4942234 | 1.2679012  |
| C  | -2.8169434 | -1.8013210 | -0.8137366 |
| H  | -3.3482706 | -2.3379307 | -0.0173754 |
| C  | -1.9492758 | -0.1057794 | -2.1275420 |
| H  | -1.6949825 | 0.8929162  | -2.5062281 |
| C  | 2.5310836  | 2.1585311  | -2.0760294 |
| H  | 3.3929390  | 2.1043314  | -2.7789175 |
| H  | 1.7684154  | 2.8146864  | -2.5592782 |
| C  | -1.6791686 | -1.3465477 | -2.7732044 |
| H  | -1.0990137 | -1.4780313 | -3.6948478 |

| vibrational spectrum |      |          |             |              |                 |       |
|----------------------|------|----------|-------------|--------------|-----------------|-------|
| #                    | mode | symmetry | wave number | IR intensity | selection rules |       |
| #                    |      |          | cm**(-1)    | km/mol       | IR              | RAMAN |
| 1                    |      |          | -0.00       | 0.00000      | -               | -     |
| 2                    |      |          | -0.00       | 0.00000      | -               | -     |
| 3                    |      |          | -0.00       | 0.00000      | -               | -     |
| 4                    |      |          | -0.00       | 0.00000      | -               | -     |
| 5                    |      |          | 0.00        | 0.00000      | -               | -     |
| 6                    |      |          | 0.00        | 0.00000      | -               | -     |
| 7                    |      | a        | 22.13       | 0.26575      | YES             | YES   |
| 8                    |      | a        | 34.53       | 0.00342      | YES             | YES   |
| 9                    |      | a        | 40.83       | 0.10205      | YES             | YES   |
| 10                   |      | a        | 43.95       | 0.32029      | YES             | YES   |
| 11                   |      | a        | 56.98       | 0.00462      | YES             | YES   |
| 12                   |      | a        | 79.19       | 0.94810      | YES             | YES   |
| 13                   |      | a        | 84.87       | 0.96923      | YES             | YES   |
| 14                   |      | a        | 97.05       | 0.92087      | YES             | YES   |
| 15                   |      | a        | 125.22      | 0.34447      | YES             | YES   |
| 16                   |      | a        | 130.15      | 0.42214      | YES             | YES   |
| 17                   |      | a        | 142.71      | 0.35153      | YES             | YES   |
| 18                   |      | a        | 154.15      | 0.09026      | YES             | YES   |
| 19                   |      | a        | 172.98      | 1.01695      | YES             | YES   |
| 20                   |      | a        | 184.03      | 0.47059      | YES             | YES   |
| 21                   |      | a        | 193.33      | 1.56778      | YES             | YES   |
| 22                   |      | a        | 212.87      | 11.65026     | YES             | YES   |
| 23                   |      | a        | 215.10      | 0.45971      | YES             | YES   |
| 24                   |      | a        | 229.72      | 1.83951      | YES             | YES   |
| 25                   |      | a        | 231.98      | 0.53839      | YES             | YES   |
| 26                   |      | a        | 248.55      | 0.07019      | YES             | YES   |
| 27                   |      | a        | 261.32      | 0.54109      | YES             | YES   |
| 28                   |      | a        | 266.35      | 0.70057      | YES             | YES   |
| 29                   |      | a        | 270.72      | 1.73231      | YES             | YES   |
| 30                   |      | a        | 273.48      | 2.29166      | YES             | YES   |
| 31                   |      | a        | 288.31      | 6.16219      | YES             | YES   |
| 32                   |      | a        | 292.99      | 0.93849      | YES             | YES   |
| 33                   |      | a        | 309.68      | 13.29755     | YES             | YES   |
| 34                   |      | a        | 320.52      | 25.66550     | YES             | YES   |
| 35                   |      | a        | 336.72      | 0.84521      | YES             | YES   |
| 36                   |      | a        | 362.42      | 1.36146      | YES             | YES   |
| 37                   |      | a        | 372.12      | 3.23316      | YES             | YES   |
| 38                   |      | a        | 399.27      | 0.14531      | YES             | YES   |
| 39                   |      | a        | 457.62      | 1.21029      | YES             | YES   |
| 40                   |      | a        | 470.75      | 1.50115      | YES             | YES   |
| 41                   |      | a        | 472.40      | 1.71636      | YES             | YES   |
| 42                   |      | a        | 500.30      | 2.19490      | YES             | YES   |
| 43                   |      | a        | 535.43      | 50.61034     | YES             | YES   |
| 44                   |      | a        | 544.81      | 0.39050      | YES             | YES   |
| 45                   |      | a        | 573.61      | 0.05459      | YES             | YES   |
| 46                   |      | a        | 589.99      | 0.02078      | YES             | YES   |
| 47                   |      | a        | 595.47      | 0.85802      | YES             | YES   |
| 48                   |      | a        | 597.02      | 1.49615      | YES             | YES   |
| 49                   |      | a        | 600.46      | 2.32216      | YES             | YES   |
| 50                   |      | a        | 627.34      | 1.20033      | YES             | YES   |

**Cyclohexene**

SCF Energy (au) BP86/SV(P) -234.4613676966  
Zero Point Energy (au) 0.1417302  
Chemical Potential (kJ mol<sup>-1</sup>) 296.61

xyz coordinates

16

|   |            |            |            |
|---|------------|------------|------------|
| C | -0.8095563 | 0.5212374  | 1.2332968  |
| C | 0.3013951  | 1.3465953  | 0.6248658  |
| H | 0.9200046  | 1.8005729  | 1.4341388  |
| H | -0.1403426 | 2.2160882  | 0.0767200  |
| C | -1.1616040 | -0.7011053 | 0.7793858  |
| C | -0.5096995 | -1.3657651 | -0.4117567 |
| H | -1.2902805 | -1.8351374 | -1.0552712 |
| H | 0.1249667  | -2.2172920 | -0.0599695 |
| C | 1.1895896  | 0.5186312  | -0.3232375 |
| H | 1.8388451  | 1.1910140  | -0.9273486 |
| H | 1.8726786  | -0.1227267 | 0.2819610  |
| C | 0.3380698  | -0.3791734 | -1.2371178 |
| H | 0.9830814  | -0.9333221 | -1.9550798 |
| H | -0.3389558 | 0.2627158  | -1.8485067 |
| H | -1.3490482 | 0.9547701  | 2.0962249  |
| H | -1.9691439 | -1.2571028 | 1.2916949  |

vibrational spectrum

| #  | mode | symmetry | wave number<br>cm** (-1) | IR intensity<br>km/mol | selection rules<br>IR | RAMAN |
|----|------|----------|--------------------------|------------------------|-----------------------|-------|
| #  |      |          |                          |                        |                       |       |
| 1  |      |          | -0.00                    | 0.00000                | -                     | -     |
| 2  |      |          | -0.00                    | 0.00000                | -                     | -     |
| 3  |      |          | -0.00                    | 0.00000                | -                     | -     |
| 4  |      |          | -0.00                    | 0.00000                | -                     | -     |
| 5  |      |          | 0.00                     | 0.00000                | -                     | -     |
| 6  |      |          | 0.00                     | 0.00000                | -                     | -     |
| 7  |      | a        | 164.78                   | 0.50480                | YES                   | YES   |
| 8  |      | a        | 272.03                   | 0.05489                | YES                   | YES   |
| 9  |      | a        | 383.77                   | 0.02006                | YES                   | YES   |
| 10 |      | a        | 444.25                   | 1.53272                | YES                   | YES   |
| 11 |      | a        | 488.49                   | 0.04790                | YES                   | YES   |
| 12 |      | a        | 633.46                   | 25.13734               | YES                   | YES   |
| 13 |      | a        | 708.32                   | 7.11031                | YES                   | YES   |
| 14 |      | a        | 805.54                   | 0.95221                | YES                   | YES   |
| 15 |      | a        | 818.94                   | 0.00157                | YES                   | YES   |
| 16 |      | a        | 874.40                   | 6.42958                | YES                   | YES   |
| 17 |      | a        | 901.42                   | 0.51784                | YES                   | YES   |
| 18 |      | a        | 905.89                   | 3.76783                | YES                   | YES   |
| 19 |      | a        | 957.62                   | 0.01199                | YES                   | YES   |
| 20 |      | a        | 985.69                   | 1.11438                | YES                   | YES   |
| 21 |      | a        | 1030.30                  | 5.55745                | YES                   | YES   |
| 22 |      | a        | 1057.78                  | 0.01423                | YES                   | YES   |
| 23 |      | a        | 1062.07                  | 0.04037                | YES                   | YES   |
| 24 |      | a        | 1124.86                  | 0.47433                | YES                   | YES   |
| 25 |      | a        | 1124.93                  | 3.55498                | YES                   | YES   |
| 26 |      | a        | 1207.51                  | 0.39963                | YES                   | YES   |
| 27 |      | a        | 1232.64                  | 0.52492                | YES                   | YES   |
| 28 |      | a        | 1253.34                  | 2.23808                | YES                   | YES   |
| 29 |      | a        | 1306.27                  | 1.00520                | YES                   | YES   |
| 30 |      | a        | 1337.07                  | 2.01721                | YES                   | YES   |
| 31 |      | a        | 1337.84                  | 0.40045                | YES                   | YES   |
| 32 |      | a        | 1346.41                  | 0.74296                | YES                   | YES   |
| 33 |      | a        | 1376.69                  | 0.22431                | YES                   | YES   |
| 34 |      | a        | 1408.03                  | 0.00655                | YES                   | YES   |

|    |   |         |          |     |     |
|----|---|---------|----------|-----|-----|
| 35 | a | 1415.35 | 10.83691 | YES | YES |
| 36 | a | 1426.77 | 5.48237  | YES | YES |
| 37 | a | 1437.75 | 2.71807  | YES | YES |
| 38 | a | 1679.45 | 3.17054  | YES | YES |
| 39 | a | 2903.78 | 1.72341  | YES | YES |
| 40 | a | 2904.14 | 61.79097 | YES | YES |
| 41 | a | 2933.09 | 19.61626 | YES | YES |
| 42 | a | 2937.01 | 17.68285 | YES | YES |
| 43 | a | 2958.18 | 20.52489 | YES | YES |
| 44 | a | 2958.30 | 53.79486 | YES | YES |
| 45 | a | 2989.27 | 42.37227 | YES | YES |
| 46 | a | 2993.70 | 44.08803 | YES | YES |
| 47 | a | 3051.86 | 7.92471  | YES | YES |
| 48 | a | 3073.36 | 39.62142 | YES | YES |

**Cyclohexyne**

SCF Energy (au) BP86/SV(P) -233.1566380815  
Zero Point Energy (au) 0.1178449  
Chemical Potential (kJ mol<sup>-1</sup>) 234.22

xyz coordinates

14

|   |            |            |            |
|---|------------|------------|------------|
| C | -0.9655376 | 0.4312543  | 1.3851041  |
| C | 0.0570245  | 1.4008703  | 0.9275614  |
| H | 0.7047599  | 1.8202855  | 1.7296632  |
| H | -0.4148513 | 2.2687114  | 0.4109686  |
| C | -1.3179369 | -0.6626521 | 0.9271330  |
| C | -0.7843699 | -1.4745742 | -0.1913730 |
| H | -1.5520814 | -1.9056458 | -0.8722985 |
| H | -0.1760553 | -2.3288782 | 0.1865600  |
| C | 0.9203889  | 0.5353415  | -0.0722765 |
| H | 1.5124053  | 1.2227090  | -0.7193835 |
| H | 1.6528702  | -0.0526355 | 0.5268385  |
| C | 0.1094793  | -0.4310024 | -0.9701517 |
| H | 0.8115679  | -0.9873548 | -1.6329209 |
| H | -0.5576635 | 0.1635707  | -1.6354247 |

vibrational spectrum

| #  | mode | symmetry | wave number<br>cm** (-1) | IR intensity<br>km/mol | selection rules<br>IR | RAMAN |
|----|------|----------|--------------------------|------------------------|-----------------------|-------|
| 1  |      |          | -0.00                    | 0.00000                | -                     | -     |
| 2  |      |          | 0.00                     | 0.00000                | -                     | -     |
| 3  |      |          | 0.00                     | 0.00000                | -                     | -     |
| 4  |      |          | 0.00                     | 0.00000                | -                     | -     |
| 5  |      |          | 0.00                     | 0.00000                | -                     | -     |
| 6  |      |          | 0.00                     | 0.00000                | -                     | -     |
| 7  |      | a        | 212.95                   | 7.27920                | YES                   | YES   |
| 8  |      | a        | 263.16                   | 0.12011                | YES                   | YES   |
| 9  |      | a        | 291.39                   | 0.76000                | YES                   | YES   |
| 10 |      | a        | 391.30                   | 72.40311               | YES                   | YES   |
| 11 |      | a        | 477.38                   | 1.68166                | YES                   | YES   |
| 12 |      | a        | 498.86                   | 17.87423               | YES                   | YES   |
| 13 |      | a        | 779.75                   | 1.58605                | YES                   | YES   |
| 14 |      | a        | 805.49                   | 0.04129                | YES                   | YES   |
| 15 |      | a        | 823.47                   | 11.42455               | YES                   | YES   |
| 16 |      | a        | 872.59                   | 6.01721                | YES                   | YES   |
| 17 |      | a        | 903.07                   | 0.02330                | YES                   | YES   |
| 18 |      | a        | 906.96                   | 21.60128               | YES                   | YES   |
| 19 |      | a        | 999.61                   | 2.84762                | YES                   | YES   |
| 20 |      | a        | 1040.77                  | 1.54538                | YES                   | YES   |
| 21 |      | a        | 1095.81                  | 1.43493                | YES                   | YES   |
| 22 |      | a        | 1117.64                  | 0.74527                | YES                   | YES   |
| 23 |      | a        | 1124.87                  | 5.08968                | YES                   | YES   |
| 24 |      | a        | 1191.93                  | 1.18645                | YES                   | YES   |
| 25 |      | a        | 1193.84                  | 0.10987                | YES                   | YES   |
| 26 |      | a        | 1256.76                  | 11.51663               | YES                   | YES   |
| 27 |      | a        | 1295.45                  | 2.55805                | YES                   | YES   |
| 28 |      | a        | 1296.19                  | 0.71251                | YES                   | YES   |
| 29 |      | a        | 1332.40                  | 5.08753                | YES                   | YES   |
| 30 |      | a        | 1408.00                  | 1.95440                | YES                   | YES   |
| 31 |      | a        | 1409.40                  | 5.33202                | YES                   | YES   |
| 32 |      | a        | 1420.70                  | 2.46469                | YES                   | YES   |
| 33 |      | a        | 1429.83                  | 0.24051                | YES                   | YES   |
| 34 |      | a        | 2129.12                  | 6.66746                | YES                   | YES   |
| 35 |      | a        | 2942.24                  | 21.23109               | YES                   | YES   |
| 36 |      | a        | 2944.18                  | 3.27379                | YES                   | YES   |
| 37 |      | a        | 2945.66                  | 78.40894               | YES                   | YES   |

|    |   |         |          |     |     |
|----|---|---------|----------|-----|-----|
| 38 | a | 2947.27 | 20.43573 | YES | YES |
| 39 | a | 2987.43 | 8.32226  | YES | YES |
| 40 | a | 2988.98 | 26.46513 | YES | YES |
| 41 | a | 2996.99 | 3.37600  | YES | YES |
| 42 | a | 3006.49 | 47.76601 | YES | YES |

#### 4 References

- 1 A. M. Borys, *Organometallics*, **2023**, *42*, 182.
- 2 R. K Harris, E. D. Becker, S. M. Cabral De Menezes, R. Goodfellow and P. Granger, *Pure Appl. Chem.*, **2001**, *73*, 1795.
- 3 R. K. Harris, E. D. Becker, S. M. C. de Menezes, P. Granger, R. E. Hoffman and K. W. Zilm, *Pure Appl. Chem.*, **2008**, *80*, 59.
- 4 A. Spaggiari, D. Vaccari, P. Davoli, G. Torre and F. Prati, *J. Org. Chem.*, **2007**, *72*, 2216.
- 5 K. Garrec and S. P. Fletcher, *Org. Lett.*, **2016**, *18*, 3814.
- 6 S. L. Buchwald, R. Y. Lum and J. C. Dewan, *J. Am. Chem. Soc.*, **1986**, *108*, 7441.
- 7 J. Skotnitzki, A. Kremsmair, D. Keefer, Y. Gong, R. de Vivie-Riedle and P. Knochel, *Angew. Chem. Int. Ed.*, **2020**, *59*, 320.
- 8 J. Schwabedissen, P. C. Trapp, H. G. Stammler, B. Neumann, J. H. Lamm, Y. V. Vishnevskiy, L. A. Körte and N. W. Mitzel, *Chem. Eur. J.*, **2019**, *25*, 7339.
- 9 H. Bauer, M. Alonso, C. Fischer, B. Rösch, H. Elsen and S. Harder, *Angew. Chem. Int. Ed.*, **2018**, *57*, 15177.
- 10 K. M. Doxsee, E. M. Hanawalt and T. J. R. Weakley, *Inorg. Chem.*, **2002**, *31*, 4420.
- 11 M. Wiesemann, H.-G. Stammler, B. Neumann and B. Hoge, *Eur. J. Inorg. Chem.*, **2017**, 4733.
- 12 P. Császár and P. Pulay, *J. Mol. Struct.*, **1984**, *114*, 31.
- 13 R. Ahlrichs, M. Bär, M. Häser, H. Horn and C. Kölmel, *Chem. Phys. Lett.*, **1989**, *162*, 165.
- 14 P. Deglmann, F. Furche and R. Ahlrichs, *Chem. Phys. Lett.*, **2002**, *362*, 511.
- 15 P. Deglmann, K. May, F. Furche and R. Ahlrichs, *Chem. Phys. Lett.*, **2004**, *384*, 103.
- 16 K. Eichkorn, O. Treutler, H. Öhm, M. Häser and R. Ahlrichs, *Chem. Phys. Lett.*, **1995**, *242*, 652.
- 17 K. Eichkorn, F. Weigend, O. Treutler and R. Ahlrichs, *Theor. Chem. Acc.*, **1997**, *97*, 119.
- 18 O. Treutler and R. Ahlrichs, *J. Chem. Phys.*, **1995**, *102*, 346.

- 19 M. von Arnim and R. Ahlrichs, *J. Chem. Phys.*, **1999**, *111*, 9183.
- 20 A. Klamt and G. Schuurmann, *J. Chem. Soc., Perkin Trans. 2*, **1993**, 799.
- 21 S. Grimme, J. Antony, S. Ehrlich and Helge Krieg, *J. Chem. Phys.*, **2010**, *132*, 154104.
- 22 S. Grimme, S. Ehrlich and L. Goerigk, *J. Comput. Chem.*, **2011**, *32*, 1456.
